# Supplementary material
Source: publisher figshare collection journal article supplement (https://acs.figshare.com/ndownloader/files/5695563)
Supplement: Supplementary file 1 [file 5695563]

# ic025617r.cif

data_General


_audit_creation_date                  '19100-09-01'

_audit_creation_method                'by teXsan for Windows v1.0'

_audit_update_record

;

?

;


#==============================================================================


# SUBMISSION DETAILS


_publ_requested_journal               ' ENTER JOURNAL NAME HERE'


_publ_requested_category            ' CHOOSE FI FM FO CI CM CO or AD'


_publ_contact_author_name           ' ENTER CONTACT NAME HERE'


_publ_contact_author_address

;

      ENTER ADDRESS

;

_publ_contact_letter

;

      ENTER TEXT OF LETTER

;


_publ_requested_coeditor_name          ?

_publ_contact_author_phone            ' ENTER PHONE NUMBER '

_publ_contact_author_fax              ' ENTER FAX NUMBER '

_publ_contact_author_email            ' ENTER EMAIL ADDRESS '


#==============================================================================


# PROCESSING SUMMARY (IUCr Office Use Only)


_journal_date_recd_electronic     ?

_journal_date_to_coeditor         ?

_journal_date_from_coeditor       ?

_journal_date_accepted            ?

_journal_date_printers_first      ?

_journal_date_printers_final      ?

_journal_date_proofs_out          ?

_journal_date_proofs_in           ?

_journal_coeditor_name            ?

_journal_coeditor_code            ?

_journal_coeditor_notes

; ?

;

_journal_techeditor_code          ?

_journal_techeditor_notes

; ?

;

_journal_coden_ASTM               ?

_journal_name_full                ?

_journal_year                     ?

_journal_volume                   ?

_journal_issue                    ?

_journal_page_first               ?

_journal_page_last                ?

_journal_suppl_publ_number        ?

_journal_suppl_publ_pages         ?


#==============================================================================


# TITLE AND AUTHOR LIST


_publ_section_title

;

      ENTER SECTION TITLE

;


_publ_section_title_footnote

;

      ENTER ANY FOOTNOTES TO TITLE

;

loop_

_publ_author_name

_publ_author_footnote

_publ_author_address

' FIRST AUTHORS NAME '

;

    FIRST AUTHORS FOOTNOTES

;

;

    FIRST AUTHORS ADDRESS

;


#==============================================================================


# TEXT


_publ_section_abstract

;

      ENTER ABSTRACT

;


_publ_section_exptl_refinement

;

      ENTER EXPERIMENTAL SECTION

;


_publ_section_comment

;

      ENTER TEXT

;


_publ_section_references

;

      ENTER OTHER REFERENCES


Molecular Structure Corporation. (1997-1998). teXsan for Windows version 1.03.

Single Crystal Structure Analysis Software. Version 1.04.

MSC, 3200 Research Forest Drive, The Woodlands, TX 77381, USA.


North, A.C.T., Phillips, D. C. & Mathews, F. S. (1968).

Acta Cryst. A24, 351-359.

;


_publ_section_acknowledgements

;

      ENTER ACKNOWLEDGEMENTS

;


_publ_section_table_legends

;

      ENTER TABLE LEGENDS

;


_publ_section_figure_captions

;

      ENTER FIGURE CAPTIONS

;


#==============================================================================


data__RTJII178


#==============================================================================


_computing_data_collection            'MSC/AFC Diffractometer Control'

_computing_cell_refinement            'MSC/AFC Diffractometer Control'

_computing_data_reduction             'teXsan for Windows (MSC, 1997)'

_computing_structure_solution          ?

_computing_structure_refinement       'teXsan for Windows (MSC, 1997)'

_computing_publication_material       'teXsan for Windows (MSC, 1997)'

#------------------------------------------------------------------------------

_cell_length_a                         12.7975

_cell_length_b                         14.4174

_cell_length_c                         16.5256

_cell_angle_alpha                      90

_cell_angle_beta                       100

_cell_angle_gamma                      90

_cell_volume                           2993.1(0)

_cell_formula_units_Z                  4

_cell_measurement_temperature          273.2

_cell_measurement_reflns_used          0

_cell_measurement_theta_min            0.0

_cell_measurement_theta_max            0.0

#------------------------------------------------------------------------------

_symmetry_cell_setting                 monoclinic

_symmetry_space_group_name_H-M        'P 21/n     '

_symmetry_Int_Tables_number            14

_symmetry_space_group_name_Hall        ?

loop_

_symmetry_equiv_pos_as_xyz

    '   +x,   +y,   +z'

    '1/2-x,1/2+y,1/2-z'

    '   -x,   -y,   -z'

    '1/2+x,1/2-y,1/2+z'

#------------------------------------------------------------------------------


_publ_section_exptl_prep

;

      ENTER EXPERIMENTAL SECTION

;

_exptl_crystal_description            'unknown'

_exptl_crystal_colour                 'unknown'

_exptl_crystal_size_max                0.00

_exptl_crystal_size_mid                0.00

_exptl_crystal_size_min                0.00

_exptl_crystal_density_diffrn          1.481

_exptl_crystal_density_meas            'not measured'

_chemical_formula_weight               667.46

_chemical_formula_analytical           ?

_chemical_formula_sum                  'C31 H31 Cl2 Co N5 O4 '

_chemical_formula_moiety               '?'

_chemical_formula_structural           ?

_chemical_compound_source              ?

_exptl_crystal_F_000                   1380.00

_exptl_absorpt_coefficient_mu          0.798

_exptl_absorpt_correction_type

;

\y scans (North,Phillips & Matthews, 1968)

;

_exptl_absorpt_correction_T_max        1.000

_exptl_absorpt_correction_T_min        0.886

_exptl_special_details

;

   ?

;


#==============================================================================


# EXPERIMENTAL DATA


_diffrn_special_details

;

   ?

;

_diffrn_ambient_temperature            273.2

_diffrn_radiation_wavelength           0.7109

_diffrn_radiation_type                 'Mo K\a'

_diffrn_radiation_source              'X-ray tube'

_diffrn_radiation_monochromator        graphite

_diffrn_radiation_detector            'scintillation counter'

_diffrn_measurement_device            'unknown'

_diffrn_measurement_method            ?


_diffrn_standards_number              0

_diffrn_standards_interval_count      0

_diffrn_standards_decay_%             -1.58

loop_

_diffrn_standard_refln_index_h

_diffrn_standard_refln_index_k

_diffrn_standard_refln_index_l

_diffrn_reflns_number                  5732

_reflns_number_total                   5475

_reflns_number_gt                      5238

_reflns_threshold_expression           I>0.00\s(I)

_diffrn_reflns_av_R_equivalents        0.06583

_diffrn_reflns_av_sigmaI/netI          0.099

_diffrn_reflns_limit_h_min             -15

_diffrn_reflns_limit_h_max             0

_diffrn_reflns_limit_k_min             -17

_diffrn_reflns_limit_k_max             0

_diffrn_reflns_limit_l_min             -19

_diffrn_reflns_limit_l_max             19

_diffrn_reflns_theta_min               2.23

_diffrn_reflns_theta_max               24.98

_diffrn_reflns_reduction_process      'Lp corrections applied'

_diffrn_orient_matrix_UB_11           -0.00563

_diffrn_orient_matrix_UB_12           -0.06355

_diffrn_orient_matrix_UB_13           -0.02470

_diffrn_orient_matrix_UB_21            0.05304

_diffrn_orient_matrix_UB_22           -0.02342

_diffrn_orient_matrix_UB_23            0.04806

_diffrn_orient_matrix_UB_31           -0.05909

_diffrn_orient_matrix_UB_32           -0.01498

_diffrn_orient_matrix_UB_33            48065.00000

#------------------------------------------------------------------------------

loop_

_atom_type_symbol

_atom_type_oxidation_number

_atom_type_number_in_cell

_atom_type_scat_dispersion_real

_atom_type_scat_dispersion_imag

_atom_type_scat_source

    C  0   124 0.002 0.002

;International Tables for Crystallography

(1992, Vol. C, Table 6.1.1.2)

;

    H  0   124 0.000 0.000

;International Tables for Crystallography

(1992, Vol. C, Table 6.1.1.2)

;

    N  0    20 0.004 0.003

;International Tables for Crystallography

(1992, Vol. C, Table 6.1.1.2)

;

    O  0    16 0.008 0.006

;International Tables for Crystallography

(1992, Vol. C, Table 6.1.1.2)

;

    Cl 0     8 0.132 0.159

;International Tables for Crystallography

(1992, Vol. C, Tables 4.2.6.8 and 6.1.1.1)

;

    Co 0     4 0.299 0.973

;International Tables for Crystallography

(1992, Vol. C, Tables 4.2.6.8 and 6.1.1.1)

;


#==============================================================================


# ATOMIC COORDINATES AND THERMAL PARAMETERS


loop_

_atom_site_label

_atom_site_fract_x

_atom_site_fract_y

_atom_site_fract_z

_atom_site_U_iso_or_equiv

_atom_site_occupancy

_atom_site_refinement_flags

_atom_site_adp_type

_atom_site_calc_flag

_atom_site_calc_attached_atom

Co(0) 0.29848(3) 0.14097(3) 0.63563(3) 0.0213(1) 1.000   .  Uani d ?

Cl(1) 0.43604(7) 0.24131(6) 0.61946(5) 0.0310(3) 1.000   .  Uani d ?

Cl(2) 0.70759(8) 0.05008(9) 0.78728(7) 0.0669(4) 1.000   .  Uani d ?

O(1) 0.0878(2) 0.1452(2) 0.8329(1) 0.0286(7) 1.000   .  Uani d ?

O(2) 0.1724(2) -0.1210(2) 0.4892(1) 0.0286(7) 1.000   .  Uani d ?

O(3) 0.2531(3) 0.4416(3) 0.4712(2) 0.100(2) 1.000   .  Uani d ?

O(4) 0.7561(4) 0.2882(4) 0.6539(3) 0.172(2) 1.000   .  Uiso d ?

N(1) 0.1746(2) 0.0485(2) 0.6526(2) 0.0194(8) 1.000   .  Uani d ?

N(2) 0.1941(2) 0.2456(2) 0.6626(2) 0.0219(8) 1.000   .  Uani d ?

N(3) 0.3445(2) 0.1393(2) 0.7743(2) 0.0237(8) 1.000   .  Uani d ?

N(4) 0.3831(2) 0.0165(2) 0.6060(2) 0.0213(8) 1.000   .  Uani d ?

N(5) 0.2274(2) 0.1287(2) 0.5063(2) 0.0234(8) 1.000   .  Uani d ?

C(1) 0.1412(2) 0.0528(2) 0.7258(2) 0.0197(9) 1.000   .  Uani d ?

C(2) 0.1087(3) -0.0251(2) 0.7619(2) 0.027(1) 1.000   .  Uani d ?

C(3) 0.1083(3) -0.1097(2) 0.7226(2) 0.031(1) 1.000   .  Uani d ?

C(4) 0.1374(3) -0.1135(2) 0.6468(2) 0.026(1) 1.000   .  Uani d ?

C(5) 0.1690(2) -0.0333(2) 0.6127(2) 0.0187(9) 1.000   .  Uani d ?

C(6) 0.1540(2) 0.1454(2) 0.7732(2) 0.0222(9) 1.000   .  Uani d ?

C(7) -0.0250(3) 0.1336(3) 0.8039(2) 0.041(1) 1.000   .  Uani d ?

C(8) 0.1367(2) 0.2355(2) 0.7227(2) 0.0205(9) 1.000   .  Uani d ?

C(9) 0.0721(3) 0.3045(3) 0.7418(2) 0.031(1) 1.000   .  Uani d ?

C(10) 0.0605(3) 0.3866(3) 0.6963(2) 0.041(1) 1.000   .  Uani d ?

C(11) 0.1190(3) 0.3979(2) 0.6352(2) 0.034(1) 1.000   .  Uani d ?

C(12) 0.1862(3) 0.3279(2) 0.6222(2) 0.026(1) 1.000   .  Uani d ?

C(13) 0.2684(2) 0.1443(2) 0.8206(2) 0.0211(9) 1.000   .  Uani d ?

C(14) 0.2941(3) 0.1467(2) 0.9065(2) 0.027(1) 1.000   .  Uani d ?

C(15) 0.3990(3) 0.1421(3) 0.9454(2) 0.033(1) 1.000   .  Uani d ?

C(16) 0.4780(3) 0.1378(2) 0.8983(2) 0.031(1) 1.000   .  Uani d ?

C(17) 0.4471(2) 0.1376(2) 0.8134(2) 0.025(1) 1.000   .  Uani d ?

C(18) 0.2123(2) -0.0396(2) 0.5325(2) 0.0223(9) 1.000   .  Uani d ?

C(19) 0.0602(3) -0.1272(3) 0.4636(2) 0.034(1) 1.000   .  Uani d ?

C(20) 0.3337(2) -0.0520(2) 0.5589(2) 0.0204(9) 1.000   .  Uani d ?

C(21) 0.3860(3) -0.1259(2) 0.5322(2) 0.027(1) 1.000   .  Uani d ?

C(22) 0.4953(3) -0.1319(3) 0.5564(2) 0.032(1) 1.000   .  Uani d ?

C(23) 0.5477(2) -0.0629(3) 0.6063(2) 0.029(1) 1.000   .  Uani d ?

C(24) 0.4899(3) 0.0101(2) 0.6284(2) 0.026(1) 1.000   .  Uani d ?

C(25) 0.1958(2) 0.0451(2) 0.4740(2) 0.022(1) 1.000   .  Uani d ?

C(26) 0.1657(2) 0.0321(2) 0.3892(2) 0.027(1) 1.000   .  Uani d ?

C(27) 0.1601(3) 0.1075(3) 0.3371(2) 0.034(1) 1.000   .  Uani d ?

C(28) 0.1892(3) 0.1939(3) 0.3701(2) 0.036(1) 1.000   .  Uani d ?

C(29) 0.2231(3) 0.2002(2) 0.4534(2) 0.030(1) 1.000   .  Uani d ?

C(30) 0.3591(5) 0.4671(4) 0.4919(3) 0.083(2) 1.000   .  Uani d ?

C(31) 0.8217(8) 0.3410(7) 0.7070(6) 0.049(3) 0.400   S Uiso d ?

C(32) 0.8089(5) 0.3480(5) 0.6186(4) 0.055(2) 0.600   S Uiso d ?

H(1) 0.0869 -0.0209 0.8135 0.032 1.000   .  Uiso c ?

H(2) 0.0880 -0.1645 0.7477 0.037 1.000   .  Uiso c ?

H(3) 0.1359 -0.1708 0.6181 0.031 1.000   .  Uiso c ?

H(4) -0.0620 0.1825 0.8250 0.050 1.000   .  Uiso c ?

H(5) -0.0402 0.1355 0.7454 0.050 1.000   .  Uiso c ?

H(6) -0.0468 0.0758 0.8224 0.050 1.000   .  Uiso c ?

H(7) 0.0351 0.2965 0.7861 0.038 1.000   .  Uiso c ?

H(8) 0.0137 0.4339 0.7076 0.049 1.000   .  Uiso c ?

H(9) 0.1130 0.4529 0.6029 0.041 1.000   .  Uiso c ?

H(10) 0.2298 0.3375 0.5828 0.032 1.000   .  Uiso c ?

H(11) 0.5006 0.1361 0.7810 0.031 1.000   .  Uiso c ?

H(12) 0.5509 0.1349 0.9238 0.037 1.000   .  Uiso c ?

H(13) 0.4171 0.1422 1.0038 0.039 1.000   .  Uiso c ?

H(14) 0.2394 0.1513 0.9380 0.033 1.000   .  Uiso c ?

H(15) 0.0322 -0.0678 0.4464 0.041 1.000   .  Uiso c ?

H(16) 0.0294 -0.1481 0.5084 0.041 1.000   .  Uiso c ?

H(17) 0.0435 -0.1697 0.4192 0.041 1.000   .  Uiso c ?

H(18) 0.3476 -0.1722 0.4978 0.032 1.000   .  Uiso c ?

H(19) 0.5335 -0.1825 0.5391 0.039 1.000   .  Uiso c ?

H(20) 0.6223 -0.0659 0.6250 0.035 1.000   .  Uiso c ?

H(21) 0.5269 0.0584 0.6609 0.031 1.000   .  Uiso c ?

H(22) 0.1492 -0.0283 0.3675 0.033 1.000   .  Uiso c ?

H(23) 0.1364 0.1004 0.2794 0.041 1.000   .  Uiso c ?

H(24) 0.1865 0.2472 0.3358 0.043 1.000   .  Uiso c ?

H(25) 0.2447 0.2596 0.4759 0.035 1.000   .  Uiso c ?

H(26) 0.3766 0.4821 0.5488 0.100 1.000   .  Uiso c ?

H(27) 0.3721 0.5192 0.4600 0.100 1.000   .  Uiso c ?

H(28) 0.4028 0.4166 0.4809 0.100 1.000   .  Uiso c ?


loop_

_atom_site_aniso_label

_atom_site_aniso_U_11

_atom_site_aniso_U_22

_atom_site_aniso_U_33

_atom_site_aniso_U_12

_atom_site_aniso_U_13

_atom_site_aniso_U_23

   Co(0)  0.0221(2)   0.0215(3)   0.0209(2)   0.0005(2)   0.0058(2)   -0.0012(2)

   Cl(1)  0.0305(5)   0.0325(5)   0.0325(5)   -0.0059(4)  0.0123(4)   -0.0046(4)

   Cl(2)  0.0430(7)   0.098(1)    0.0538(7)   0.0106(7)   -0.0054(5)  -0.0209(7)

   O(1)   0.030(1)    0.038(2)    0.022(1)    -0.002(1)   0.015(1)    -0.004(1)

   O(2)   0.031(1)    0.026(2)    0.028(1)    -0.000(1)   0.004(1)    -0.011(1)

   O(3)   0.103(3)    0.125(4)    0.079(3)    -0.044(3)   0.032(2)    0.016(2)

   N(1)   0.017(1)    0.025(2)    0.016(1)    0.000(1)    0.001(1)    0.001(1)

   N(2)   0.019(1)    0.024(2)    0.021(2)    -0.000(1)   -0.000(1)   -0.004(1)

   N(3)   0.027(2)    0.019(2)    0.025(2)    -0.001(1)   0.004(1)    -0.004(1)

   N(4)   0.020(2)    0.022(2)    0.021(2)    0.005(1)    0.003(1)    0.000(1)

   N(5)   0.027(2)    0.023(2)    0.022(2)    0.004(1)    0.009(1)    -0.001(1)

   C(1)   0.014(2)    0.023(2)    0.023(2)    -0.001(2)   0.005(1)    -0.001(2)

   C(2)   0.029(2)    0.032(2)    0.021(2)    -0.001(2)   0.009(2)    0.001(2)

   C(3)   0.035(2)    0.024(2)    0.036(2)    -0.000(2)   0.013(2)    0.007(2)

   C(4)   0.028(2)    0.019(2)    0.028(2)    -0.001(2)   -0.000(2)   -0.003(2)

   C(5)   0.015(2)    0.021(2)    0.018(2)    0.005(2)    -0.004(1)   -0.000(2)

   C(6)   0.025(2)    0.024(2)    0.020(2)    -0.002(2)   0.011(1)    -0.004(2)

   C(7)   0.032(2)    0.051(3)    0.044(2)    -0.004(2)   0.020(2)    -0.002(2)

   C(8)   0.018(2)    0.022(2)    0.019(2)    -0.003(2)   -0.000(1)   -0.003(2)

   C(9)   0.027(2)    0.037(2)    0.030(2)    0.008(2)    0.009(2)    -0.005(2)

   C(10)  0.044(3)    0.027(2)    0.054(3)    0.012(2)    0.015(2)    -0.006(2)

   C(11)  0.046(2)    0.025(2)    0.032(2)    0.009(2)    0.009(2)    0.003(2)

   C(12)  0.032(2)    0.027(2)    0.020(2)    -0.002(2)   0.006(2)    -0.003(2)

   C(13)  0.026(2)    0.018(2)    0.020(2)    -0.002(2)   0.004(1)    -0.002(2)

   C(14)  0.032(2)    0.024(2)    0.026(2)    -0.003(2)   0.007(2)    -0.000(2)

   C(15)  0.046(2)    0.025(2)    0.025(2)    -0.006(2)   0.003(2)    -0.002(2)

   C(16)  0.027(2)    0.027(2)    0.034(2)    -0.000(2)   -0.004(2)   -0.001(2)

   C(17)  0.020(2)    0.024(2)    0.029(2)    -0.001(2)   -0.002(2)   -0.005(2)

   C(18)  0.021(2)    0.020(2)    0.025(2)    0.001(2)    0.002(1)    -0.005(2)

   C(19)  0.028(2)    0.039(3)    0.030(2)    -0.007(2)   -0.010(2)   -0.005(2)

   C(20)  0.024(2)    0.021(2)    0.017(2)    0.003(2)    0.005(1)    0.001(2)

   C(21)  0.026(2)    0.029(2)    0.023(2)    0.003(2)    0.002(2)    -0.003(2)

   C(22)  0.036(2)    0.036(2)    0.030(2)    0.018(2)    0.019(2)    0.008(2)

   C(23)  0.018(2)    0.041(2)    0.028(2)    0.007(2)    0.003(2)    0.006(2)

   C(24)  0.024(2)    0.032(2)    0.021(2)    -0.001(2)   0.003(2)    -0.001(2)

   C(25)  0.016(2)    0.028(2)    0.021(2)    0.006(2)    0.005(1)    -0.003(2)

   C(26)  0.027(2)    0.035(2)    0.021(2)    0.001(2)    0.005(2)    -0.001(2)

   C(27)  0.026(2)    0.057(3)    0.019(2)    0.003(2)    0.001(2)    0.002(2)

   C(28)  0.041(2)    0.041(3)    0.029(2)    0.011(2)    0.014(2)    0.014(2)

   C(29)  0.031(2)    0.030(2)    0.028(2)    0.005(2)    0.006(2)    -0.001(2)

   C(30)  0.137(5)    0.079(4)    0.034(3)    0.001(4)    0.018(3)    -0.004(3)


#==============================================================================


# REFINEMENT DATA


_refine_special_details

;

   ?

;

_refine_ls_structure_factor_coef       Fsqd

_refine_ls_matrix_type                 full

_refine_ls_weighting_scheme            sigma

_refine_ls_weighting_details           'w = 1/[\s^2^(Fo)]

'_refine_ls_hydrogen_treatment          noref

_refine_ls_extinction_method           none

_refine_ls_extinction_coef             ?

_refine_ls_abs_structure_details       ?

_refine_ls_abs_structure_Flack         ?

_refine_ls_number_reflns               5238

_refine_ls_number_parameters           382

_refine_ls_number_restraints           0

_refine_ls_number_constraints          0

_refine_ls_R_factor_all                0.0948

_refine_ls_R_factor_gt                 ?

_refine_ls_wR_factor_all               0.1140

_refine_ls_wR_factor_ref               ?

_refine_ls_goodness_of_fit_all         1.969

_refine_ls_goodness_of_fit_ref         1.970

_refine_ls_shift/su_max                0.0500

_refine_ls_shift/su_mean               0.0016

_refine_diff_density_min               -0.84

_refine_diff_density_max               0.99


#==============================================================================


# MOLECULAR GEOMETRY


_geom_special_details

;

   ?

;

loop_

_geom_bond_atom_site_label_1

_geom_bond_atom_site_label_2

_geom_bond_distance

_geom_bond_site_symmetry_1

_geom_bond_site_symmetry_2

_geom_bond_publ_flag

   Co Cl(1) 2.333(1) . . ?

   Co N(1) 2.131(4) . . ?

   Co N(2) 2.118(4) . . ?

   Co N(3) 2.254(4) . . ?

   Co N(4) 2.199(4) . . ?

   Co N(5) 2.165(4) . . ?

   O(1) C(6) 1.417(5) . . ?

   O(1) C(7) 1.442(5) . . ?

   O(2) C(18) 1.418(5) . . ?

   O(2) C(19) 1.421(5) . . ?

   O(3) C(30) 1.384(8) . . ?

   O(4) C(31) 1.33(1) . . ?

   O(4) C(32) 1.30(1) . . ?

   N(1) C(1) 1.358(5) . . ?

   N(1) C(5) 1.347(5) . . ?

   N(2) C(8) 1.352(5) . . ?

   N(2) C(12) 1.356(6) . . ?

   N(3) C(13) 1.351(5) . . ?

   N(3) C(17) 1.348(5) . . ?

   N(4) C(20) 1.339(5) . . ?

   N(4) C(24) 1.349(5) . . ?

   N(5) C(25) 1.349(5) . . ?

   N(5) C(29) 1.346(6) . . ?

   C(1) C(2) 1.372(6) . . ?

   C(1) C(6) 1.541(6) . . ?

   C(2) C(3) 1.381(7) . . ?

   C(2) H(1) 0.95 . . no

   C(3) C(4) 1.376(6) . . ?

   C(3) H(2) 0.95 . . no

   C(4) C(5) 1.380(6) . . ?

   C(4) H(3) 0.95 . . no

   C(5) C(18) 1.534(6) . . ?

   C(6) C(8) 1.537(6) . . ?

   C(6) C(13) 1.523(6) . . ?

   C(7) H(4) 0.95 . . no

   C(7) H(5) 0.95 . . no

   C(7) H(6) 0.95 . . no

   C(8) C(9) 1.369(6) . . ?

   C(9) C(10) 1.395(7) . . ?

   C(9) H(7) 0.95 . . no

   C(10) C(11) 1.377(7) . . ?

   C(10) H(8) 0.95 . . no

   C(11) C(12) 1.369(6) . . ?

   C(11) H(9) 0.95 . . no

   C(12) H(10) 0.95 . . no

   C(13) C(14) 1.395(6) . . ?

   C(14) C(15) 1.375(6) . . ?

   C(14) H(14) 0.95 . . no

   C(15) C(16) 1.390(6) . . ?

   C(15) H(13) 0.95 . . no

   C(16) C(17) 1.382(6) . . ?

   C(16) H(12) 0.95 . . no

   C(17) H(11) 0.95 . . no

   C(18) C(20) 1.541(6) . . ?

   C(18) C(25) 1.547(6) . . ?

   C(19) H(15) 0.95 . . no

   C(19) H(16) 0.95 . . no

   C(19) H(17) 0.95 . . no

   C(20) C(21) 1.376(6) . . ?

   C(21) C(22) 1.383(6) . . ?

   C(21) H(18) 0.95 . . no

   C(22) C(23) 1.382(7) . . ?

   C(22) H(19) 0.95 . . no

   C(23) C(24) 1.375(6) . . ?

   C(23) H(20) 0.95 . . no

   C(24) H(21) 0.95 . . no

   C(25) C(26) 1.392(6) . . ?

   C(26) C(27) 1.381(7) . . ?

   C(26) H(22) 0.95 . . no

   C(27) C(28) 1.383(7) . . ?

   C(27) H(23) 0.95 . . no

   C(28) C(29) 1.365(6) . . ?

   C(28) H(24) 0.95 . . no

   C(29) H(25) 0.95 . . no

   C(30) H(26) 0.95 . . no

   C(30) H(27) 0.95 . . no

   C(30) H(28) 0.96 . . no

   C(31) C(32) 1.44(2) . . ?

#------------------------------------------------------------------------------

loop_

_geom_angle_atom_site_label_1

_geom_angle_atom_site_label_2

_geom_angle_atom_site_label_3

_geom_angle

_geom_angle_site_symmetry_1

_geom_angle_site_symmetry_2

_geom_angle_site_symmetry_3

_geom_angle_publ_flag

   Cl(1) Co  N(1) 178.9(1) . . . ?

   Cl(1) Co  N(2) 95.9(1) . . . ?

   Cl(1) Co  N(3) 93.8(1) . . . ?

   Cl(1) Co  N(4) 93.8(1) . . . ?

   Cl(1) Co  N(5) 97.0(1) . . . ?

   N(1) Co  N(2) 84.4(1) . . . ?

   N(1) Co  N(3) 85.2(1) . . . ?

   N(1) Co  N(4) 86.0(1) . . . ?

   N(1) Co  N(5) 84.0(1) . . . ?

   N(2) Co  N(3) 81.2(1) . . . ?

   N(2) Co  N(4) 170.2(1) . . . ?

   N(2) Co  N(5) 95.9(1) . . . ?

   N(3) Co  N(4) 100.0(1) . . . ?

   N(3) Co  N(5) 169.1(1) . . . ?

   N(4) Co  N(5) 81.1(1) . . . ?

   C(6) O(1)  C(7) 117.5(3) . . . ?

   C(18) O(2)  C(19) 116.7(3) . . . ?

   C(31) O(4)  C(32) 66.5(8) . . . ?

   Co N(1)  C(1) 117.2(3) . . . ?

   Co N(1)  C(5) 117.0(3) . . . ?

   C(1) N(1)  C(5) 118.7(4) . . . ?

   Co N(2)  C(8) 122.1(3) . . . ?

   Co N(2)  C(12) 120.7(3) . . . ?

   C(8) N(2)  C(12) 117.2(4) . . . ?

   Co N(3)  C(13) 119.9(3) . . . ?

   Co N(3)  C(17) 122.0(3) . . . ?

   C(13) N(3)  C(17) 118.0(4) . . . ?

   Co N(4)  C(20) 122.2(3) . . . ?

   Co N(4)  C(24) 120.8(3) . . . ?

   C(20) N(4)  C(24) 116.8(4) . . . ?

   Co N(5)  C(25) 120.1(3) . . . ?

   Co N(5)  C(29) 122.4(3) . . . ?

   C(25) N(5)  C(29) 117.1(4) . . . ?

   N(1) C(1)  C(2) 121.5(4) . . . ?

   N(1) C(1)  C(6) 118.1(4) . . . ?

   C(2) C(1)  C(6) 119.9(4) . . . ?

   C(1) C(2)  C(3) 119.6(4) . . . ?

   C(1) C(2)  H(1) 120.3 . . . no

   C(3) C(2)  H(1) 120.2 . . . no

   C(2) C(3)  C(4) 119.0(4) . . . ?

   C(2) C(3)  H(2) 120.5 . . . no

   C(4) C(3)  H(2) 120.5 . . . no

   C(3) C(4)  C(5) 119.3(4) . . . ?

   C(3) C(4)  H(3) 120.4 . . . no

   C(5) C(4)  H(3) 120.3 . . . no

   N(1) C(5)  C(4) 121.8(4) . . . ?

   N(1) C(5)  C(18) 118.8(4) . . . ?

   C(4) C(5)  C(18) 119.0(4) . . . ?

   O(1) C(6)  C(1) 109.4(4) . . . ?

   O(1) C(6)  C(8) 109.6(4) . . . ?

   O(1) C(6)  C(13) 106.6(3) . . . ?

   C(1) C(6)  C(8) 117.8(3) . . . ?

   C(1) C(6)  C(13) 104.6(4) . . . ?

   C(8) C(6)  C(13) 108.2(4) . . . ?

   O(1) C(7)  H(4) 109.2 . . . no

   O(1) C(7)  H(5) 109.5 . . . no

   O(1) C(7)  H(6) 109.4 . . . no

   H(4) C(7)  H(5) 109.5 . . . no

   H(4) C(7)  H(6) 109.5 . . . no

   H(5) C(7)  H(6) 109.8 . . . no

   N(2) C(8)  C(6) 116.6(4) . . . ?

   N(2) C(8)  C(9) 121.9(4) . . . ?

   C(6) C(8)  C(9) 121.3(4) . . . ?

   C(8) C(9)  C(10) 119.9(4) . . . ?

   C(8) C(9)  H(7) 120.0 . . . no

   C(10) C(9)  H(7) 120.1 . . . no

   C(9) C(10)  C(11) 118.7(5) . . . ?

   C(9) C(10)  H(8) 120.5 . . . no

   C(11) C(10)  H(8) 120.8 . . . no

   C(10) C(11)  C(12) 118.2(5) . . . ?

   C(10) C(11)  H(9) 120.9 . . . no

   C(12) C(11)  H(9) 120.8 . . . no

   N(2) C(12)  C(11) 123.9(4) . . . ?

   N(2) C(12)  H(10) 118.0 . . . no

   C(11) C(12)  H(10) 118.1 . . . no

   N(3) C(13)  C(6) 115.8(4) . . . ?

   N(3) C(13)  C(14) 121.5(4) . . . ?

   C(6) C(13)  C(14) 122.7(4) . . . ?

   C(13) C(14)  C(15) 119.6(4) . . . ?

   C(13) C(14)  H(14) 120.2 . . . no

   C(15) C(14)  H(14) 120.2 . . . no

   C(14) C(15)  C(16) 119.4(4) . . . ?

   C(14) C(15)  H(13) 120.1 . . . no

   C(16) C(15)  H(13) 120.5 . . . no

   C(15) C(16)  C(17) 118.1(4) . . . ?

   C(15) C(16)  H(12) 120.8 . . . no

   C(17) C(16)  H(12) 121.2 . . . no

   N(3) C(17)  C(16) 123.4(4) . . . ?

   N(3) C(17)  H(11) 118.1 . . . no

   C(16) C(17)  H(11) 118.4 . . . no

   O(2) C(18)  C(5) 109.3(4) . . . ?

   O(2) C(18)  C(20) 107.1(4) . . . ?

   O(2) C(18)  C(25) 110.1(4) . . . ?

   C(5) C(18)  C(20) 105.8(3) . . . ?

   C(5) C(18)  C(25) 117.7(4) . . . ?

   C(20) C(18)  C(25) 106.2(3) . . . ?

   O(2) C(19)  H(15) 109.5 . . . no

   O(2) C(19)  H(16) 109.5 . . . no

   O(2) C(19)  H(17) 109.7 . . . no

   H(15) C(19)  H(16) 109.2 . . . no

   H(15) C(19)  H(17) 109.5 . . . no

   H(16) C(19)  H(17) 109.5 . . . no

   N(4) C(20)  C(18) 114.7(4) . . . ?

   N(4) C(20)  C(21) 123.5(4) . . . ?

   C(18) C(20)  C(21) 121.6(4) . . . ?

   C(20) C(21)  C(22) 118.9(4) . . . ?

   C(20) C(21)  H(18) 120.6 . . . no

   C(22) C(21)  H(18) 120.5 . . . no

   C(21) C(22)  C(23) 118.5(4) . . . ?

   C(21) C(22)  H(19) 120.7 . . . no

   C(23) C(22)  H(19) 120.9 . . . no

   C(22) C(23)  C(24) 119.0(4) . . . ?

   C(22) C(23)  H(20) 120.4 . . . no

   C(24) C(23)  H(20) 120.6 . . . no

   N(4) C(24)  C(23) 123.2(4) . . . ?

   N(4) C(24)  H(21) 118.3 . . . no

   C(23) C(24)  H(21) 118.4 . . . no

   N(5) C(25)  C(18) 117.6(4) . . . ?

   N(5) C(25)  C(26) 121.5(4) . . . ?

   C(18) C(25)  C(26) 120.1(4) . . . ?

   C(25) C(26)  C(27) 119.6(5) . . . ?

   C(25) C(26)  H(22) 120.1 . . . no

   C(27) C(26)  H(22) 120.3 . . . no

   C(26) C(27)  C(28) 119.0(4) . . . ?

   C(26) C(27)  H(23) 120.7 . . . no

   C(28) C(27)  H(23) 120.3 . . . no

   C(27) C(28)  C(29) 117.9(5) . . . ?

   C(27) C(28)  H(24) 121.0 . . . no

   C(29) C(28)  H(24) 121.1 . . . no

   N(5) C(29)  C(28) 124.7(5) . . . ?

   N(5) C(29)  H(25) 117.6 . . . no

   C(28) C(29)  H(25) 117.7 . . . no

   O(3) C(30)  H(26) 110.0 . . . no

   O(3) C(30)  H(27) 109.8 . . . no

   O(3) C(30)  H(28) 109.4 . . . no

   H(26) C(30)  H(27) 109.6 . . . no

   H(26) C(30)  H(28) 109.1 . . . no

   H(27) C(30)  H(28) 108.9 . . . no

   O(4) C(31)  C(32) 55.7(7) . . . ?

   O(4) C(32)  C(31) 57.8(7) . . . ?

#------------------------------------------------------------------------------

loop_

_geom_contact_atom_site_label_1

_geom_contact_atom_site_label_2

_geom_contact_distance

_geom_contact_site_symmetry_1

_geom_contact_site_symmetry_2

_geom_contact_publ_flag

#------------------------------------------------------------------------------

loop_

_geom_torsion_atom_site_label_1

_geom_torsion_atom_site_label_2

_geom_torsion_atom_site_label_3

_geom_torsion_atom_site_label_4

_geom_torsion_site_symmetry_1

_geom_torsion_site_symmetry_2

_geom_torsion_site_symmetry_3

_geom_torsion_site_symmetry_4

_geom_torsion

_geom_torsion_publ_flag

   Co N(1) C(1) C(2) . . . . -145.4(4) no

   Co N(1) C(1) C(6) . . . . 26.8(5) no

   Co N(1) C(5) C(4) . . . . 145.2(3) no

   Co N(1) C(5) C(18) . . . . -27.0(5) no

   Co N(2) C(8) C(6) . . . . 2.2(5) no

   Co N(2) C(8) C(9) . . . . 177.7(3) no

   Co N(2) C(12) C(11) . . . . 178.7(4) no

   Co N(3) C(13) C(6) . . . . 3.2(5) no

   Co N(3) C(13) C(14) . . . . -177.7(3) no

   Co N(3) C(17) C(16) . . . . 179.1(4) no

   Co N(4) C(20) C(18) . . . . -4.0(5) no

   Co N(4) C(20) C(21) . . . . 173.0(3) no

   Co N(4) C(24) C(23) . . . . -175.0(3) no

   Co N(5) C(25) C(18) . . . . 0.0(5) no

   Co N(5) C(25) C(26) . . . . -169.6(3) no

   Co N(5) C(29) C(28) . . . . 173.0(4) no

   Cl(1) Co N(1) C(1) . . . . 50(6) no

   Cl(1) Co N(1) C(5) . . . . -101(6) no

   Cl(1) Co N(2) C(8) . . . . -137.7(3) no

   Cl(1) Co N(2) C(12) . . . . 39.0(3) no

   Cl(1) Co N(3) C(13) . . . . 137.8(3) no

   Cl(1) Co N(3) C(17) . . . . -39.2(4) no

   Cl(1) Co N(4) C(20) . . . . -139.2(3) no

   Cl(1) Co N(4) C(24) . . . . 34.5(3) no

   Cl(1) Co N(5) C(25) . . . . 136.6(3) no

   Cl(1) Co N(5) C(29) . . . . -36.3(3) no

   O(1) C(6) C(1) N(1) . . . . 162.6(4) no

   O(1) C(6) C(1) C(2) . . . . -25.0(6) no

   O(1) C(6) C(8) N(2) . . . . -179.5(4) no

   O(1) C(6) C(8) C(9) . . . . 4.9(6) no

   O(1) C(6) C(13) N(3) . . . . 176.6(4) no

   O(1) C(6) C(13) C(14) . . . . -2.4(6) no

   O(2) C(18) C(5) N(1) . . . . -163.5(3) no

   O(2) C(18) C(5) C(4) . . . . 24.1(5) no

   O(2) C(18) C(20) N(4) . . . . -175.4(4) no

   O(2) C(18) C(20) C(21) . . . . 7.5(6) no

   O(2) C(18) C(25) N(5) . . . . 178.5(4) no

   O(2) C(18) C(25) C(26) . . . . -11.6(5) no

   N(1) Co N(2) C(8) . . . . 41.2(3) no

   N(1) Co N(2) C(12) . . . . -142.1(3) no

   N(1) Co N(3) C(13) . . . . -42.7(3) no

   N(1) Co N(3) C(17) . . . . 140.3(4) no

   N(1) Co N(4) C(20) . . . . 41.9(3) no

   N(1) Co N(4) C(24) . . . . -144.4(3) no

   N(1) Co N(5) C(25) . . . . -43.0(3) no

   N(1) Co N(5) C(29) . . . . 144.2(4) no

   N(1) C(1) C(2) C(3) . . . . -1.1(7) no

   N(1) C(1) C(6) C(8) . . . . 36.6(5) no

   N(1) C(1) C(6) C(13) . . . . -83.5(4) no

   N(1) C(5) C(4) C(3) . . . . 1.6(7) no

   N(1) C(5) C(18) C(20) . . . . 81.5(5) no

   N(1) C(5) C(18) C(25) . . . . -36.9(5) no

   N(2) Co N(1) C(1) . . . . -56.1(3) no

   N(2) Co N(1) C(5) . . . . 153.7(3) no

   N(2) Co N(3) C(13) . . . . 42.4(3) no

   N(2) Co N(3) C(17) . . . . -134.6(4) no

   N(2) Co N(4) C(20) . . . . 30(1) no

   N(2) Co N(4) C(24) . . . . -156.0(7) no

   N(2) Co N(5) C(25) . . . . -126.7(3) no

   N(2) Co N(5) C(29) . . . . 60.4(4) no

   N(2) C(8) C(6) C(1) . . . . -53.6(5) no

   N(2) C(8) C(6) C(13) . . . . 64.6(5) no

   N(2) C(8) C(9) C(10) . . . . 2.7(7) no

   N(2) C(12) C(11) C(10) . . . . 4.1(8) no

   N(3) Co N(1) C(1) . . . . 25.5(3) no

   N(3) Co N(1) C(5) . . . . -124.7(3) no

   N(3) Co N(2) C(8) . . . . -44.8(3) no

   N(3) Co N(2) C(12) . . . . 131.9(3) no

   N(3) Co N(4) C(20) . . . . 126.3(3) no

   N(3) Co N(4) C(24) . . . . -60.0(3) no

   N(3) Co N(5) C(25) . . . . -52.7(9) no

   N(3) Co N(5) C(29) . . . . 134.4(7) no

   N(3) C(13) C(6) C(1) . . . . 60.8(5) no

   N(3) C(13) C(6) C(8) . . . . -65.5(5) no

   N(3) C(13) C(14) C(15) . . . . -1.3(8) no

   N(3) C(17) C(16) C(15) . . . . -1.5(8) no

   N(4) Co N(1) C(1) . . . . 125.9(3) no

   N(4) Co N(1) C(5) . . . . -24.4(3) no

   N(4) Co N(2) C(8) . . . . 53(1) no

   N(4) Co N(2) C(12) . . . . -130.4(8) no

   N(4) Co N(3) C(13) . . . . -127.7(3) no

   N(4) Co N(3) C(17) . . . . 55.3(4) no

   N(4) Co N(5) C(25) . . . . 43.9(3) no

   N(4) Co N(5) C(29) . . . . -129.0(4) no

   N(4) C(20) C(18) C(5) . . . . -58.9(5) no

   N(4) C(20) C(18) C(25) . . . . 66.9(5) no

   N(4) C(20) C(21) C(22) . . . . 1.6(7) no

   N(4) C(24) C(23) C(22) . . . . 2.3(7) no

   N(5) Co N(1) C(1) . . . . -152.7(3) no

   N(5) Co N(1) C(5) . . . . 57.1(3) no

   N(5) Co N(2) C(8) . . . . 124.6(3) no

   N(5) Co N(2) C(12) . . . . -58.7(3) no

   N(5) Co N(3) C(13) . . . . -32.9(9) no

   N(5) Co N(3) C(17) . . . . 150.0(7) no

   N(5) Co N(4) C(20) . . . . -42.7(3) no

   N(5) Co N(4) C(24) . . . . 131.0(3) no

   N(5) C(25) C(18) C(5) . . . . 52.3(5) no

   N(5) C(25) C(18) C(20) . . . . -65.9(5) no

   N(5) C(25) C(26) C(27) . . . . -5.1(7) no

   N(5) C(29) C(28) C(27) . . . . -1.9(8) no

   C(1) N(1) C(5) C(4) . . . . -4.5(6) no

   C(1) N(1) C(5) C(18) . . . . -176.7(4) no

   C(1) C(2) C(3) C(4) . . . . -1.9(7) no

   C(1) C(6) O(1) C(7) . . . . -59.4(5) no

   C(1) C(6) C(8) C(9) . . . . 130.8(5) no

   C(1) C(6) C(13) C(14) . . . . -118.3(5) no

   C(2) C(1) N(1) C(5) . . . . 4.3(6) no

   C(2) C(1) C(6) C(8) . . . . -151.1(4) no

   C(2) C(1) C(6) C(13) . . . . 88.8(5) no

   C(2) C(3) C(4) C(5) . . . . 1.7(7) no

   C(3) C(2) C(1) C(6) . . . . -173.2(4) no

   C(3) C(4) C(5) C(18) . . . . 173.7(4) no

   C(4) C(5) C(18) C(20) . . . . -90.9(5) no

   C(4) C(5) C(18) C(25) . . . . 150.7(4) no

   C(5) N(1) C(1) C(6) . . . . 176.5(4) no

   C(5) C(18) O(2) C(19) . . . . 61.8(5) no

   C(5) C(18) C(20) C(21) . . . . 124.0(4) no

   C(5) C(18) C(25) C(26) . . . . -137.8(4) no

   C(6) C(8) N(2) C(12) . . . . -174.7(4) no

   C(6) C(8) C(9) C(10) . . . . 178.1(4) no

   C(6) C(13) N(3) C(17) . . . . -179.6(4) no

   C(6) C(13) C(14) C(15) . . . . 177.7(5) no

   C(7) O(1) C(6) C(8) . . . . 71.2(5) no

   C(7) O(1) C(6) C(13) . . . . -171.9(4) no

   C(8) N(2) C(12) C(11) . . . . -4.4(7) no

   C(8) C(6) C(13) C(14) . . . . 115.4(5) no

   C(8) C(9) C(10) C(11) . . . . -3.0(8) no

   C(9) C(8) N(2) C(12) . . . . 0.9(6) no

   C(9) C(8) C(6) C(13) . . . . -111.0(5) no

   C(9) C(10) C(11) C(12) . . . . -0.2(8) no

   C(13) N(3) C(17) C(16) . . . . 2.0(7) no

   C(13) C(14) C(15) C(16) . . . . 1.8(8) no

   C(14) C(13) N(3) C(17) . . . . -0.6(7) no

   C(14) C(15) C(16) C(17) . . . . -0.5(8) no

   C(18) C(20) N(4) C(24) . . . . -177.9(4) no

   C(18) C(20) C(21) C(22) . . . . 178.4(4) no

   C(18) C(25) N(5) C(29) . . . . 173.3(4) no

   C(18) C(25) C(26) C(27) . . . . -174.5(4) no

   C(19) O(2) C(18) C(20) . . . . 176.0(4) no

   C(19) O(2) C(18) C(25) . . . . -69.0(5) no

   C(20) N(4) C(24) C(23) . . . . -1.0(7) no

   C(20) C(18) C(25) C(26) . . . . 103.9(5) no

   C(20) C(21) C(22) C(23) . . . . -0.3(7) no

   C(21) C(20) N(4) C(24) . . . . -1.0(6) no

   C(21) C(20) C(18) C(25) . . . . -110.1(5) no

   C(21) C(22) C(23) C(24) . . . . -1.5(7) no

   C(25) N(5) C(29) C(28) . . . . -0.1(7) no

   C(25) C(26) C(27) C(28) . . . . 2.9(7) no

   C(26) C(25) N(5) C(29) . . . . 3.6(6) no

   C(26) C(27) C(28) C(29) . . . . 0.4(7) no

#------------------------------------------------------------------------------


#==============================================================================

# Additional structures and associated data_? identifiers

# should be added at this point if there is more than one

# structure analysis in the CIF.

#===END


data_General


#==============================================================================


_audit_creation_date                  '1998-12-03'

_audit_creation_method                'by teXsan for Windows v1.0'

_audit_update_record

;

?

;


#==============================================================================


# SUBMISSION DETAILS


_publ_requested_journal               ' ENTER JOURNAL NAME HERE'


_publ_requested_category            ' CHOOSE FI FM FO CI CM CO or AD'


_publ_contact_author_name           ' ENTER CONTACT NAME HERE'


_publ_contact_author_address

;

      ENTER ADDRESS

;

_publ_contact_letter

;

      ENTER TEXT OF LETTER

;


_publ_requested_coeditor_name          ?

_publ_contact_author_phone            ' ENTER PHONE NUMBER '

_publ_contact_author_fax              ' ENTER FAX NUMBER '

_publ_contact_author_email            ' ENTER EMAIL ADDRESS '


#==============================================================================


# PROCESSING SUMMARY (IUCr Office Use Only)


_journal_date_recd_electronic     ?

_journal_date_to_coeditor         ?

_journal_date_from_coeditor       ?

_journal_date_accepted            ?

_journal_date_printers_first      ?

_journal_date_printers_final      ?

_journal_date_proofs_out          ?

_journal_date_proofs_in           ?

_journal_coeditor_name            ?

_journal_coeditor_code            ?

_journal_coeditor_notes

; ?

;

_journal_techeditor_code          ?

_journal_techeditor_notes

; ?

;

_journal_coden_ASTM               ?

_journal_name_full                ?

_journal_year                     ?

_journal_volume                   ?

_journal_issue                    ?

_journal_page_first               ?

_journal_page_last                ?

_journal_suppl_publ_number        ?

_journal_suppl_publ_pages         ?


#==============================================================================


# TITLE AND AUTHOR LIST


_publ_section_title

;

      ENTER SECTION TITLE

;


_publ_section_title_footnote

;

      ENTER ANY FOOTNOTES TO TITLE

;

loop_

_publ_author_name

_publ_author_footnote

_publ_author_address

' FIRST AUTHORS NAME '

;

    FIRST AUTHORS FOOTNOTES

;

;

    FIRST AUTHORS ADDRESS

;


#==============================================================================


# TEXT


_publ_section_abstract

;

      ENTER ABSTRACT

;


_publ_section_exptl_refinement

;

      ENTER EXPERIMENTAL SECTION

;


_publ_section_comment

;

      ENTER TEXT

;


_publ_section_references

;

      ENTER OTHER REFERENCES


Molecular Structure Corporation. (1997-1998). teXsan for Windows version 1.03.

Single Crystal Structure Analysis Software. Version 1.04.

MSC, 3200 Research Forest Drive, The Woodlands, TX 77381, USA.


Sheldrick, G.M. (1985). In: "Crystallographic

Computing 3" (Eds G.M. Sheldrick, C. Kruger and

R. Goddard) Oxford University Press, pp. 175-189.

;


_publ_section_acknowledgements

;

      ENTER ACKNOWLEDGEMENTS

;


_publ_section_table_legends

;

      ENTER TABLE LEGENDS

;


_publ_section_figure_captions

;

      ENTER FIGURE CAPTIONS

;


#==============================================================================


data__rt65a


#==============================================================================


_computing_data_collection            'MSC/AFC Diffractometer Control'

_computing_cell_refinement            'MSC/AFC Diffractometer Control'

_computing_data_reduction             'teXsan for Windows (MSC, 1997)'

_computing_structure_solution

;

SHELXS86 (Sheldrick, 1985)

;

_computing_structure_refinement       'teXsan for Windows (MSC, 1997)'

_computing_publication_material       'teXsan for Windows (MSC, 1997)'

#------------------------------------------------------------------------------

_cell_length_a                         23.542(1)

_cell_length_b                         14.288(0)

_cell_length_c                         19.713(1)

_cell_angle_alpha                      90

_cell_angle_beta                       112.66(0)

_cell_angle_gamma                      90

_cell_volume                           6119(0)

_cell_formula_units_Z                  8

_cell_measurement_temperature          273.2

_cell_measurement_reflns_used          0

_cell_measurement_theta_min            0.0

_cell_measurement_theta_max            0.0

#------------------------------------------------------------------------------

_symmetry_cell_setting                 monoclinic

_symmetry_space_group_name_H-M        'C 2/c      '

_symmetry_Int_Tables_number            15

_symmetry_space_group_name_Hall        ?

loop_

_symmetry_equiv_pos_as_xyz

    '   +x,   +y,   +z'

    '   +x,   +y,   +z'

    '   -x,   +y,1/2-z'

    '   -x,   +y,1/2-z'

    '   -x,   -y,   -z'

    '   -x,   -y,   -z'

    '   +x,   -y,1/2+z'

    '   +x,   -y,1/2+z'

    '1/2+x,1/2+y,   +z'

    '1/2+x,1/2+y,   +z'

    '1/2-x,1/2+y,1/2-z'

    '1/2-x,1/2+y,1/2-z'

    '1/2-x,1/2-y,   -z'

    '1/2-x,1/2-y,   -z'

    '1/2+x,1/2-y,1/2+z'

    '1/2+x,1/2-y,1/2+z'

#------------------------------------------------------------------------------


_publ_section_exptl_prep

;

      ENTER EXPERIMENTAL SECTION

;

_exptl_crystal_description            'unknown'

_exptl_crystal_colour                 'unknown'

_exptl_crystal_size_max                0.00

_exptl_crystal_size_mid                0.00

_exptl_crystal_size_min                0.00

_exptl_crystal_density_diffrn          1.459

_exptl_crystal_density_meas            'not measured'

_chemical_formula_weight               672.03

_chemical_formula_analytical           ?

_chemical_formula_sum                  'C31.50 H25 Cl2 Cu N5 O4 '

_chemical_formula_moiety               '?'

_chemical_formula_structural           ?

_chemical_compound_source              ?

_exptl_crystal_F_000                   2752.00

_exptl_absorpt_coefficient_mu          0.933

_exptl_absorpt_correction_type         none

_exptl_special_details

;

   ?

;


#==============================================================================


# EXPERIMENTAL DATA


_diffrn_special_details

;

   ?

;

_diffrn_ambient_temperature            273.2

_diffrn_radiation_wavelength           0.7107

_diffrn_radiation_type                 'Mo K\a'

_diffrn_radiation_source              'X-ray tube'

_diffrn_radiation_monochromator        graphite

_diffrn_radiation_detector            'scintillation counter'

_diffrn_measurement_device            'unknown'

_diffrn_measurement_method            ?


_diffrn_standards_number              0

_diffrn_standards_interval_count      0

_diffrn_standards_decay_%             0.00

loop_

_diffrn_standard_refln_index_h

_diffrn_standard_refln_index_k

_diffrn_standard_refln_index_l


_diffrn_reflns_number                  14676

_reflns_number_total                   5640

_reflns_number_gt                      3213

_reflns_threshold_expression           I>3.00\s(I)

_diffrn_reflns_av_R_equivalents        0.04824

_diffrn_reflns_av_sigmaI/netI          ?

_diffrn_reflns_limit_h_min             0

_diffrn_reflns_limit_h_max             29

_diffrn_reflns_limit_k_min             -17

_diffrn_reflns_limit_k_max             17

_diffrn_reflns_limit_l_min             -23

_diffrn_reflns_limit_l_max             21

_diffrn_reflns_theta_min               1.12

_diffrn_reflns_theta_max               26.08

_diffrn_reflns_reduction_process      'Lp corrections applied'

_diffrn_orient_matrix_UB_11            0.00000

_diffrn_orient_matrix_UB_12            0.00000

_diffrn_orient_matrix_UB_13            0.00000

_diffrn_orient_matrix_UB_21            0.00000

_diffrn_orient_matrix_UB_22            0.00000

_diffrn_orient_matrix_UB_23            0.00000

_diffrn_orient_matrix_UB_31            0.00000

_diffrn_orient_matrix_UB_32            0.00000

_diffrn_orient_matrix_UB_33            0.00000

#------------------------------------------------------------------------------

loop_

_atom_type_symbol

_atom_type_oxidation_number

_atom_type_number_in_cell

_atom_type_scat_dispersion_real

_atom_type_scat_dispersion_imag

_atom_type_scat_source

    C  0   252 0.002 0.002

;International Tables for Crystallography

(1992, Vol. C, Table 6.1.1.2)

;

    H  0   200 0.000 0.000

;International Tables for Crystallography

(1992, Vol. C, Table 6.1.1.2)

;

    N  0    40 0.004 0.003

;International Tables for Crystallography

(1992, Vol. C, Table 6.1.1.2)

;

    O  0    32 0.008 0.006

;International Tables for Crystallography

(1992, Vol. C, Table 6.1.1.2)

;

    Cl 0    16 0.132 0.159

;International Tables for Crystallography

(1992, Vol. C, Tables 4.2.6.8 and 6.1.1.1)

;

    Cu 0     8 0.263 1.266

;International Tables for Crystallography

(1992, Vol. C, Tables 4.2.6.8 and 6.1.1.1)

;


#==============================================================================


# ATOMIC COORDINATES AND THERMAL PARAMETERS


loop_

_atom_site_label

_atom_site_fract_x

_atom_site_fract_y

_atom_site_fract_z

_atom_site_U_iso_or_equiv

_atom_site_occupancy

_atom_site_refinement_flags

_atom_site_adp_type

_atom_site_calc_flag

_atom_site_calc_attached_atom

Cu(0) 0.1654(0) 0.8025(0) 0.2524(0) 0.025(0) 1   .  Uani d ?

Cl(1) 0.0913(1) 0.9067(1) 0.1946(1) 0.036(0) 1   .  Uani d ?

Cl(2) 0.0772(1) 0.310(0) 0.4622(1) 0.049(0) 1   .  Uani d ?

O(1) 0.372(0) 0.815(0) 0.323(0) 0.039(1) 1   .  Uani d ?

O(2) 0.133(0) 0.544(0) 0.364(0) 0.030(1) 1   .  Uani d ?

O(3) 0 0.206(1) 0 0.16(0) 1   S Uiso d ?

O(4) 0.484(1) 0.45(0) 0.513(1) 0.18(1) 1   S Uiso d ?

O(5) 0.108(0) 0.121(1) 0.404(0) 0.13(0) 1   .  Uiso d ?

N(1) 0.229(0) 0.709(0) 0.314(0) 0.022(1) 1   .  Uani d ?

N(2) 0.223(0) 0.901(0) 0.314(0) 0.03(0) 1   .  Uani d ?

N(3) 0.222(0) 0.811(0) 0.179(0) 0.03(0) 1   .  Uani d ?

N(4) 0.107(0) 0.693(0) 0.209(0) 0.03(0) 1   .  Uani d ?

N(5) 0.182(0) 0.745(0) 0.429(0) 0.03(0) 1   .  Uani d ?

C(1) 0.287(0) 0.717(0) 0.317(0) 0.03(0) 1   .  Uani d ?

C(2) 0.325(0) 0.640(0) 0.333(0) 0.04(0) 1   .  Uani d ?

C(3) 0.306(0) 0.557(0) 0.352(0) 0.03(0) 1   .  Uani d ?

C(4) 0.248(0) 0.551(0) 0.355(0) 0.03(0) 1   .  Uani d ?

C(5) 0.211(0) 0.628(0) 0.336(0) 0.02(0) 1   .  Uani d ?

C(6) 0.307(0) 0.811(0) 0.298(0) 0.03(0) 1   .  Uani d ?

C(7) 0.407(0) 0.807(0) 0.402(0) 0.05(0) 1   .  Uani d ?

C(8) 0.283(0) 0.898(0) 0.324(0) 0.03(0) 1   .  Uani d ?

C(9) 0.321(0) 0.976(0) 0.353(0) 0.04(0) 1   .  Uani d ?

C(10) 0.299(0) 1.053(0) 0.377(0) 0.04(0) 1   .  Uani d ?

C(11) 0.239(0) 1.051(0) 0.371(0) 0.04(0) 1   .  Uani d ?

C(12) 0.202(0) 0.975(0) 0.339(0) 0.04(0) 1   .  Uani d ?

C(13) 0.283(0) 0.813(0) 0.213(0) 0.03(0) 1   .  Uani d ?

C(14) 0.322(0) 0.817(0) 0.175(0) 0.04(0) 1   .  Uani d ?

C(15) 0.296(0) 0.819(0) 0.099(0) 0.04(0) 1   .  Uani d ?

C(16) 0.233(0) 0.819(0) 0.064(0) 0.03(0) 1   .  Uani d ?

C(17) 0.198(0) 0.814(0) 0.106(0) 0.03(0) 1   .  Uani d ?

C(18) 0.145(0) 0.628(0) 0.332(0) 0.02(0) 1   .  Uani d ?

C(19) 0.152(0) 0.540(0) 0.442(0) 0.04(0) 1   .  Uani d ?

C(20) 0.102(0) 0.622(0) 0.251(0) 0.03(0) 1   .  Uani d ?

C(21) 0.062(0) 0.548(0) 0.223(0) 0.03(0) 1   .  Uani d ?

C(22) 0.026(0) 0.546(0) 0.148(0) 0.03(0) 1   .  Uani d ?

C(23) 0.032(0) 0.618(0) 0.104(0) 0.03(0) 1   .  Uani d ?

C(24) 0.073(0) 0.690(0) 0.137(0) 0.03(0) 1   .  Uani d ?

C(25) 0.133(0) 0.715(0) 0.371(0) 0.02(0) 1   .  Uani d ?

C(26) 0.075(0) 0.756(0) 0.349(0) 0.03(0) 1   .  Uani d ?

C(27) 0.067(0) 0.829(0) 0.389(0) 0.04(0) 1   .  Uani d ?

C(28) 0.118(0) 0.860(0) 0.449(0) 0.04(0) 1   .  Uani d ?

C(29) 0.173(0) 0.817(0) 0.466(0) 0.03(0) 1   .  Uani d ?

C(30) 0.471(0) 0.132(1) 0.699(0) 0.08(0) 1   .  Uiso d ?

C(31) 0.515(1) 0.36(0) 0.537(1) 0.10(1) 1   S Uiso d ?

C(32) 0.054(1) 0.090(1) 0.341(1) 0.15(0) 1   .  Uiso d ?

H(1) 0 0 0 0 1   .  Uiso c ?

H(2) 0 0 0 0 1   .  Uiso c ?

H(3) 0 0 0 0 1   .  Uiso c ?

H(4) 0 0 0 0 1   .  Uiso c ?

H(5) 0 0 0 0 1   .  Uiso c ?

H(6) 0 0 0 0 1   .  Uiso c ?

H(7) 0 0 0 0 1   .  Uiso c ?

H(8) 0 1 0 0 1   .  Uiso c ?

H(9) 0 1 0 0 1   .  Uiso c ?

H(10) 0 0 0 0 1   .  Uiso c ?

H(11) 0 0 0 0 1   .  Uiso c ?

H(12) 0 0 0 0 1   .  Uiso c ?

H(13) 0 0 0 0 1   .  Uiso c ?

H(14) 0 0 0 0 1   .  Uiso c ?

H(15) 0 0 0 0 1   .  Uiso c ?

H(16) 0 0 0 0 1   .  Uiso c ?

H(17) 0 0 0 0 1   .  Uiso c ?

H(18) 0 0 0 0 1   .  Uiso c ?

H(19) 0 0 0 0 1   .  Uiso c ?

H(20) 0 0 0 0 1   .  Uiso c ?

H(21) 0 0 0 0 1   .  Uiso c ?

H(22) 0 0 0 0 1   .  Uiso c ?

H(23) 0 0 0 0 1   .  Uiso c ?

H(24) 0 0 0 0 1   .  Uiso c ?

H(25) 0 0 0 0 1   .  Uiso c ?


loop_

_atom_site_aniso_label

_atom_site_aniso_U_11

_atom_site_aniso_U_22

_atom_site_aniso_U_33

_atom_site_aniso_U_12

_atom_site_aniso_U_13

_atom_site_aniso_U_23

   Cu(0)  0.018(0)    0.027(0)    0.029(0)    -0.001(0)   0.009(0)    0.001(0)

   Cl(1)  0.024(1)    0.034(1)    0.047(1)    0.002(1)    0.009(1)    0.006(1)

   Cl(2)  0.030(1)    0.08(0)     0.036(1)    -0.003(1)   0.014(1)    -0.003(1)

   O(1)   0.02(0)     0.06(0)     0.04(0)     -0.01(0)    0.01(0)     0.00(0)

   O(2)   0.03(0)     0.03(0)     0.03(0)     -0.00(0)    0.01(0)     0.00(0)

   N(1)   0.01(0)     0.03(0)     0.02(0)     -0.00(0)    0.01(0)     0.00(0)

   N(2)   0.03(0)     0.03(0)     0.03(0)     -0.00(0)    0.01(0)     -0.00(0)

   N(3)   0.03(0)     0.03(0)     0.02(0)     -0.01(0)    0.01(0)     -0.00(0)

   N(4)   0.02(0)     0.04(0)     0.02(0)     -0.00(0)    0.01(0)     -0.01(0)

   N(5)   0.02(0)     0.04(0)     0.03(0)     0.00(0)     0.01(0)     -0.00(0)

   C(1)   0.02(0)     0.03(0)     0.03(0)     -0.00(0)    0.01(0)     0.00(0)

   C(2)   0.02(0)     0.05(0)     0.04(0)     0.01(0)     0.01(0)     0.00(0)

   C(3)   0.03(0)     0.03(0)     0.04(0)     0.01(0)     0.02(0)     -0.00(0)

   C(4)   0.03(0)     0.03(0)     0.03(0)     0.01(0)     0.01(0)     0.00(0)

   C(5)   0.02(0)     0.03(0)     0.02(0)     0.00(0)     0.01(0)     -0.00(0)

   C(6)   0.01(0)     0.04(0)     0.03(0)     -0.00(0)    0.01(0)     -0.00(0)

   C(7)   0.03(0)     0.06(0)     0.05(0)     -0.01(0)    0.00(0)     0.00(0)

   C(8)   0.03(0)     0.04(0)     0.02(0)     -0.01(0)    0.01(0)     0.00(0)

   C(9)   0.04(0)     0.04(0)     0.03(0)     -0.02(0)    0.02(0)     -0.00(0)

   C(10)  0.06(0)     0.03(0)     0.04(0)     -0.02(0)    0.02(0)     -0.01(0)

   C(11)  0.06(0)     0.02(0)     0.04(0)     0.00(0)     0.02(0)     0.00(0)

   C(12)  0.04(0)     0.03(0)     0.04(0)     -0.00(0)    0.01(0)     -0.01(0)

   C(13)  0.02(0)     0.03(0)     0.03(0)     -0.00(0)    0.01(0)     -0.00(0)

   C(14)  0.04(0)     0.03(0)     0.05(0)     -0.00(0)    0.02(0)     -0.00(0)

   C(15)  0.05(0)     0.03(0)     0.04(0)     -0.01(0)    0.03(0)     -0.01(0)

   C(16)  0.05(0)     0.03(0)     0.03(0)     -0.01(0)    0.02(0)     -0.00(0)

   C(17)  0.03(0)     0.04(0)     0.03(0)     -0.01(0)    0.01(0)     -0.02(0)

   C(18)  0.03(0)     0.02(0)     0.02(0)     0.00(0)     0.01(0)     0.00(0)

   C(19)  0.05(0)     0.04(0)     0.04(0)     0.00(0)     0.02(0)     0.01(0)

   C(20)  0.03(0)     0.03(0)     0.03(0)     -0.00(0)    0.02(0)     -0.00(0)

   C(21)  0.02(0)     0.03(0)     0.03(0)     -0.00(0)    0.01(0)     -0.00(0)

   C(22)  0.02(0)     0.04(0)     0.04(0)     -0.01(0)    0.01(0)     -0.01(0)

   C(23)  0.03(0)     0.05(0)     0.03(0)     -0.00(0)    0.01(0)     -0.00(0)

   C(24)  0.03(0)     0.04(0)     0.03(0)     -0.01(0)    0.01(0)     0.00(0)

   C(25)  0.02(0)     0.03(0)     0.02(0)     0.00(0)     0.01(0)     0.00(0)

   C(26)  0.02(0)     0.05(0)     0.03(0)     0.00(0)     0.01(0)     -0.00(0)

   C(27)  0.02(0)     0.05(0)     0.04(0)     0.02(0)     0.01(0)     -0.00(0)

   C(28)  0.04(0)     0.04(0)     0.04(0)     0.01(0)     0.01(0)     -0.01(0)

   C(29)  0.03(0)     0.04(0)     0.03(0)     -0.00(0)    0.01(0)     -0.01(0)


#==============================================================================


# REFINEMENT DATA


_refine_special_details

;

   ?

;

_refine_ls_structure_factor_coef       F

_refine_ls_matrix_type                 full

_refine_ls_weighting_scheme            sigma

_refine_ls_weighting_details           'w = 1/[\s^2^(Fo) + 0.00022|Fo|^2^]'

_refine_ls_hydrogen_treatment          noref

_refine_ls_extinction_method           none

_refine_ls_extinction_coef             ?

_refine_ls_abs_structure_details       ?

_refine_ls_abs_structure_Flack         ?

_refine_ls_number_reflns               3213

_refine_ls_number_parameters           374

_refine_ls_number_restraints           0

_refine_ls_number_constraints          0

_refine_ls_R_factor_all                0.0555

_refine_ls_R_factor_gt                 0.0550

_refine_ls_wR_factor_all               0.0690

_refine_ls_wR_factor_ref               0.0690

_refine_ls_goodness_of_fit_all         2.174

_refine_ls_goodness_of_fit_ref         2.170

_refine_ls_shift/su_max                0.2800

_refine_ls_shift/su_mean               0.0130

_refine_diff_density_min               -0.68

_refine_diff_density_max               0.99


#==============================================================================


# MOLECULAR GEOMETRY


_geom_special_details

;

   ?

;

loop_

_geom_bond_atom_site_label_1

_geom_bond_atom_site_label_2

_geom_bond_distance

_geom_bond_site_symmetry_1

_geom_bond_site_symmetry_2

_geom_bond_publ_flag

   Cu Cl(1) 2.25(0) . . ?

   Cu N(1) 2.02(1) . . ?

   Cu N(2) 2.04(1) . . ?

   Cu N(4) 2.00(1) . . ?

   Cu N(5) 2.30(1) . . ?

   O(1) C(6) 1.4(0) . . ?

   O(1) C(7) 1.4(0) . . ?

   O(2) C(18) 1.43(1) . . ?

   O(2) C(19) 1.4(0) . . ?

   N(1) C(1) 1.3(0) . . ?

   N(1) C(5) 1.3(0) . . ?

   N(2) C(8) 1.4(0) . . ?

   N(2) C(12) 1.33(1) . . ?

   N(3) C(13) 1.33(1) . . ?

   N(3) C(17) 1.3(0) . . ?

   N(4) C(20) 1.4(0) . . ?

   N(4) C(24) 1.3(0) . . ?

   N(5) C(25) 1.34(1) . . ?

   N(5) C(29) 1.3(0) . . ?

   C(1) C(2) 1.4(0) . . ?

   C(1) C(6) 1.5(0) . . ?

   C(2) C(3) 1.4(0) . . ?

   C(2) H(1) 0.95 . . no

   C(3) C(4) 1.3(0) . . ?

   C(3) H(2) 0.95 . . no

   C(4) C(5) 1.4(0) . . ?

   C(4) H(3) 0.95 . . no

   C(5) C(18) 1.5(0) . . ?

   C(6) C(8) 1.52(1) . . ?

   C(6) C(13) 1.5(0) . . ?

   C(7) H(4) 0.95 . . no

   C(7) H(5) 0.95 . . no

   C(7) H(6) 0.95 . . no

   C(8) C(9) 1.4(0) . . ?

   C(9) C(10) 1.4(0) . . ?

   C(9) H(7) 0.95 . . no

   C(10) C(11) 1.4(0) . . ?

   C(10) H(8) 0.95 . . no

   C(11) C(12) 1.4(0) . . ?

   C(11) H(9) 0.95 . . no

   C(12) H(10) 0.95 . . no

   C(13) C(14) 1.4(0) . . ?

   C(14) C(15) 1.4(0) . . ?

   C(14) H(11) 0.95 . . no

   C(15) C(16) 1.4(0) . . ?

   C(15) H(12) 0.95 . . no

   C(16) C(17) 1.4(0) . . ?

   C(16) H(13) 0.95 . . no

   C(17) H(14) 0.95 . . no

   C(18) C(20) 1.5(0) . . ?

   C(18) C(25) 1.6(0) . . ?

   C(19) H(15) 0.95 . . no

   C(19) H(16) 0.95 . . no

   C(19) H(17) 0.95 . . no

   C(20) C(21) 1.4(0) . . ?

   C(21) C(22) 1.4(0) . . ?

   C(21) H(18) 0.95 . . no

   C(22) C(23) 1.4(0) . . ?

   C(22) H(19) 0.95 . . no

   C(23) C(24) 1.4(0) . . ?

   C(23) H(20) 0.95 . . no

   C(24) H(21) 0.95 . . no

   C(25) C(26) 1.4(0) . . ?

   C(26) C(27) 1.4(0) . . ?

   C(26) H(22) 0.95 . . no

   C(27) C(28) 1.4(0) . . ?

   C(27) H(23) 0.95 . . no

   C(28) C(29) 1.4(0) . . ?

   C(28) H(24) 0.95 . . no

   C(29) H(25) 0.95 . . no

   C(30) C(31) 1.4(0) . . ?

   C(30) C(31) 1.4(0) . . ?

   C(32) C(33) 1.3(0) . . ?

#------------------------------------------------------------------------------

loop_

_geom_angle_atom_site_label_1

_geom_angle_atom_site_label_2

_geom_angle_atom_site_label_3

_geom_angle

_geom_angle_site_symmetry_1

_geom_angle_site_symmetry_2

_geom_angle_site_symmetry_3

_geom_angle_publ_flag

   Cl(1) Cu  N(1) 173(0) . . . ?

   Cl(1) Cu  N(2) 91(0) . . . ?

   Cl(1) Cu  N(4) 93(0) . . . ?

   Cl(1) Cu  N(5) 100(0) . . . ?

   N(1) Cu  N(2) 88(0) . . . ?

   N(1) Cu  N(4) 87(0) . . . ?

   N(1) Cu  N(5) 87(0) . . . ?

   N(2) Cu  N(4) 169(0) . . . ?

   N(2) Cu  N(5) 104(0) . . . ?

   N(4) Cu  N(5) 85(0) . . . ?

   C(6) O(1)  C(7) 119(1) . . . ?

   C(18) O(2)  C(19) 118(1) . . . ?

   Cu N(1)  C(1) 121(1) . . . ?

   Cu N(1)  C(5) 119(1) . . . ?

   C(1) N(1)  C(5) 118(1) . . . ?

   Cu N(2)  C(8) 121(1) . . . ?

   Cu N(2)  C(12) 120(1) . . . ?

   C(8) N(2)  C(12) 118(1) . . . ?

   C(13) N(3)  C(17) 118(1) . . . ?

   Cu N(4)  C(20) 119(1) . . . ?

   Cu N(4)  C(24) 121(1) . . . ?

   C(20) N(4)  C(24) 119(1) . . . ?

   Cu N(5)  C(25) 119(1) . . . ?

   Cu N(5)  C(29) 125(1) . . . ?

   C(25) N(5)  C(29) 117(1) . . . ?

   N(1) C(1)  C(2) 122(1) . . . ?

   N(1) C(1)  C(6) 115(1) . . . ?

   C(2) C(1)  C(6) 122(1) . . . ?

   C(1) C(2)  C(3) 118(1) . . . ?

   C(1) C(2)  H(1) 120.7 . . . no

   C(3) C(2)  H(1) 120.8 . . . no

   C(2) C(3)  C(4) 119(1) . . . ?

   C(2) C(3)  H(2) 120.2 . . . no

   C(4) C(3)  H(2) 120.4 . . . no

   C(3) C(4)  C(5) 120(1) . . . ?

   C(3) C(4)  H(3) 120.2 . . . no

   C(5) C(4)  H(3) 120.3 . . . no

   N(1) C(5)  C(4) 122(1) . . . ?

   N(1) C(5)  C(18) 117(1) . . . ?

   C(4) C(5)  C(18) 121(1) . . . ?

   O(1) C(6)  C(1) 111(1) . . . ?

   O(1) C(6)  C(8) 105(1) . . . ?

   O(1) C(6)  C(13) 111(1) . . . ?

   C(1) C(6)  C(8) 107(1) . . . ?

   C(1) C(6)  C(13) 110(1) . . . ?

   C(8) C(6)  C(13) 113(1) . . . ?

   O(1) C(7)  H(4) 109.3 . . . no

   O(1) C(7)  H(5) 109.4 . . . no

   O(1) C(7)  H(6) 109.4 . . . no

   H(4) C(7)  H(5) 109.5 . . . no

   H(4) C(7)  H(6) 109.5 . . . no

   H(5) C(7)  H(6) 109.7 . . . no

   N(2) C(8)  C(6) 115(1) . . . ?

   N(2) C(8)  C(9) 122(1) . . . ?

   C(6) C(8)  C(9) 123(1) . . . ?

   C(8) C(9)  C(10) 119(1) . . . ?

   C(8) C(9)  H(7) 120.4 . . . no

   C(10) C(9)  H(7) 120.5 . . . no

   C(9) C(10)  C(11) 119(1) . . . ?

   C(9) C(10)  H(8) 120.6 . . . no

   C(11) C(10)  H(8) 120.6 . . . no

   C(10) C(11)  C(12) 120(1) . . . ?

   C(10) C(11)  H(9) 120.2 . . . no

   C(12) C(11)  H(9) 120.2 . . . no

   N(2) C(12)  C(11) 122(1) . . . ?

   N(2) C(12)  H(10) 118.9 . . . no

   C(11) C(12)  H(10) 119.0 . . . no

   N(3) C(13)  C(6) 115(1) . . . ?

   N(3) C(13)  C(14) 123(1) . . . ?

   C(6) C(13)  C(14) 122(1) . . . ?

   C(13) C(14)  C(15) 119(1) . . . ?

   C(13) C(14)  H(11) 120.5 . . . no

   C(15) C(14)  H(11) 120.5 . . . no

   C(14) C(15)  C(16) 117(1) . . . ?

   C(14) C(15)  H(12) 121.5 . . . no

   C(16) C(15)  H(12) 121.3 . . . no

   C(15) C(16)  C(17) 119(1) . . . ?

   C(15) C(16)  H(13) 120.5 . . . no

   C(17) C(16)  H(13) 120.4 . . . no

   N(3) C(17)  C(16) 124(1) . . . ?

   N(3) C(17)  H(14) 117.9 . . . no

   C(16) C(17)  H(14) 117.9 . . . no

   O(2) C(18)  C(5) 110(1) . . . ?

   O(2) C(18)  C(20) 109(1) . . . ?

   O(2) C(18)  C(25) 106(1) . . . ?

   C(5) C(18)  C(20) 116(1) . . . ?

   C(5) C(18)  C(25) 107(1) . . . ?

   C(20) C(18)  C(25) 108(1) . . . ?

   O(2) C(19)  H(15) 109.4 . . . no

   O(2) C(19)  H(16) 109.5 . . . no

   O(2) C(19)  H(17) 109.5 . . . no

   H(15) C(19)  H(16) 109.4 . . . no

   H(15) C(19)  H(17) 109.5 . . . no

   H(16) C(19)  H(17) 109.5 . . . no

   N(4) C(20)  C(18) 118(1) . . . ?

   N(4) C(20)  C(21) 120(1) . . . ?

   C(18) C(20)  C(21) 121(1) . . . ?

   C(20) C(21)  C(22) 120(1) . . . ?

   C(20) C(21)  H(18) 120.0 . . . no

   C(22) C(21)  H(18) 120.0 . . . no

   C(21) C(22)  C(23) 119(1) . . . ?

   C(21) C(22)  H(19) 120.5 . . . no

   C(23) C(22)  H(19) 120.3 . . . no

   C(22) C(23)  C(24) 119(1) . . . ?

   C(22) C(23)  H(20) 120.4 . . . no

   C(24) C(23)  H(20) 120.4 . . . no

   N(4) C(24)  C(23) 122(1) . . . ?

   N(4) C(24)  H(21) 119.0 . . . no

   C(23) C(24)  H(21) 119.0 . . . no

   N(5) C(25)  C(18) 113(1) . . . ?

   N(5) C(25)  C(26) 125(1) . . . ?

   C(18) C(25)  C(26) 122(1) . . . ?

   C(25) C(26)  C(27) 118(1) . . . ?

   C(25) C(26)  H(22) 121.0 . . . no

   C(27) C(26)  H(22) 121.0 . . . no

   C(26) C(27)  C(28) 119(1) . . . ?

   C(26) C(27)  H(23) 120.3 . . . no

   C(28) C(27)  H(23) 120.4 . . . no

   C(27) C(28)  C(29) 118(1) . . . ?

   C(27) C(28)  H(24) 120.8 . . . no

   C(29) C(28)  H(24) 120.9 . . . no

   N(5) C(29)  C(28) 123(1) . . . ?

   N(5) C(29)  H(25) 118.4 . . . no

   C(28) C(29)  H(25) 118.5 . . . no

   C(31) C(30)  C(31) 85(2) . . . ?

#------------------------------------------------------------------------------

loop_

_geom_contact_atom_site_label_1

_geom_contact_atom_site_label_2

_geom_contact_distance

_geom_contact_site_symmetry_1

_geom_contact_site_symmetry_2

_geom_contact_publ_flag

         ?  ?    ?      ? ?  ?

# -- ENTER NON-BONDED CONTACTS HERE, ONE PER LINE --

# e.g. O1 N1 2.841(1) . . yes

#------------------------------------------------------------------------------

loop_

_geom_torsion_atom_site_label_1

_geom_torsion_atom_site_label_2

_geom_torsion_atom_site_label_3

_geom_torsion_atom_site_label_4

_geom_torsion_site_symmetry_1

_geom_torsion_site_symmetry_2

_geom_torsion_site_symmetry_3

_geom_torsion_site_symmetry_4

_geom_torsion

_geom_torsion_publ_flag

   Cu N(1) C(1) C(2) . . . . 158(1) no

   Cu N(1) C(1) C(6) . . . . -18(1) no

   Cu N(1) C(5) C(4) . . . . -155(1) no

   Cu N(1) C(5) C(18) . . . . 20(1) no

   Cu N(2) C(8) C(6) . . . . -3(1) no

   Cu N(2) C(8) C(9) . . . . 179(1) no

   Cu N(2) C(12) C(11) . . . . -180(1) no

   Cu N(4) C(20) C(18) . . . . -9(1) no

   Cu N(4) C(20) C(21) . . . . 168(1) no

   Cu N(4) C(24) C(23) . . . . -170(1) no

   Cu N(5) C(25) C(18) . . . . 0(1) no

   Cu N(5) C(25) C(26) . . . . 179(1) no

   Cu N(5) C(29) C(28) . . . . -180(1) no

   Cl(1) Cu N(1) C(1) . . . . 57(2) no

   Cl(1) Cu N(1) C(5) . . . . -139(1) no

   Cl(1) Cu N(2) C(8) . . . . -132(1) no

   Cl(1) Cu N(2) C(12) . . . . 49(1) no

   Cl(1) Cu N(4) C(20) . . . . -137(1) no

   Cl(1) Cu N(4) C(24) . . . . 37(1) no

   Cl(1) Cu N(5) C(25) . . . . 137(1) no

   Cl(1) Cu N(5) C(29) . . . . -43(1) no

   O(1) C(6) C(1) N(1) . . . . -173(1) no

   O(1) C(6) C(1) C(2) . . . . 11(1) no

   O(1) C(6) C(8) N(2) . . . . -177(1) no

   O(1) C(6) C(8) C(9) . . . . 1(1) no

   O(1) C(6) C(13) N(3) . . . . 89(1) no

   O(1) C(6) C(13) C(14) . . . . -87(1) no

   O(2) C(18) C(5) N(1) . . . . 164(1) no

   O(2) C(18) C(5) C(4) . . . . -22(1) no

   O(2) C(18) C(20) N(4) . . . . -171(1) no

   O(2) C(18) C(20) C(21) . . . . 13(1) no

   O(2) C(18) C(25) N(5) . . . . -179(1) no

   O(2) C(18) C(25) C(26) . . . . 2(1) no

   N(1) Cu N(2) C(8) . . . . 42(1) no

   N(1) Cu N(2) C(12) . . . . -138(1) no

   N(1) Cu N(4) C(20) . . . . 50(1) no

   N(1) Cu N(4) C(24) . . . . -137(1) no

   N(1) Cu N(5) C(25) . . . . -42(1) no

   N(1) Cu N(5) C(29) . . . . 138(1) no

   N(1) C(1) C(2) C(3) . . . . 0(1) no

   N(1) C(1) C(6) C(8) . . . . 73(1) no

   N(1) C(1) C(6) C(13) . . . . -50(1) no

   N(1) C(5) C(4) C(3) . . . . -6(1) no

   N(1) C(5) C(18) C(20) . . . . 39(1) no

   N(1) C(5) C(18) C(25) . . . . -81(1) no

   N(2) Cu N(1) C(1) . . . . -30(1) no

   N(2) Cu N(1) C(5) . . . . 134(1) no

   N(2) Cu N(4) C(20) . . . . 111(2) no

   N(2) Cu N(4) C(24) . . . . -76(2) no

   N(2) Cu N(5) C(25) . . . . -130(1) no

   N(2) Cu N(5) C(29) . . . . 51(1) no

   N(2) C(8) C(6) C(1) . . . . -59(1) no

   N(2) C(8) C(6) C(13) . . . . 62(1) no

   N(2) C(8) C(9) C(10) . . . . 2(1) no

   N(2) C(12) C(11) C(10) . . . . 0(2) no

   N(3) C(13) C(6) C(1) . . . . -34(1) no

   N(3) C(13) C(6) C(8) . . . . -153(1) no

   N(3) C(13) C(14) C(15) . . . . -1(2) no

   N(3) C(17) C(16) C(15) . . . . 1(2) no

   N(4) Cu N(1) C(1) . . . . 141(1) no

   N(4) Cu N(1) C(5) . . . . -56(1) no

   N(4) Cu N(2) C(8) . . . . -19(2) no

   N(4) Cu N(2) C(12) . . . . 161(1) no

   N(4) Cu N(5) C(25) . . . . 45(1) no

   N(4) Cu N(5) C(29) . . . . -135(1) no

   N(4) C(20) C(18) C(5) . . . . -45(1) no

   N(4) C(20) C(18) C(25) . . . . 75(1) no

   N(4) C(20) C(21) C(22) . . . . 4(1) no

   N(4) C(24) C(23) C(22) . . . . 0(1) no

   N(5) Cu N(1) C(1) . . . . -134(1) no

   N(5) Cu N(1) C(5) . . . . 30(1) no

   N(5) Cu N(2) C(8) . . . . 128(1) no

   N(5) Cu N(2) C(12) . . . . -52(1) no

   N(5) Cu N(4) C(20) . . . . -38(1) no

   N(5) Cu N(4) C(24) . . . . 136(1) no

   N(5) C(25) C(18) C(5) . . . . 63(1) no

   N(5) C(25) C(18) C(20) . . . . -63(1) no

   N(5) C(25) C(26) C(27) . . . . 1(1) no

   N(5) C(29) C(28) C(27) . . . . 0(1) no

   C(1) N(1) C(5) C(4) . . . . 9(1) no

   C(1) N(1) C(5) C(18) . . . . -176(1) no

   C(1) C(2) C(3) C(4) . . . . 3(1) no

   C(1) C(6) O(1) C(7) . . . . 82(1) no

   C(1) C(6) C(8) C(9) . . . . 119(1) no

   C(1) C(6) C(13) C(14) . . . . 150(1) no

   C(2) C(1) N(1) C(5) . . . . -6(1) no

   C(2) C(1) C(6) C(8) . . . . -103(1) no

   C(2) C(1) C(6) C(13) . . . . 134(1) no

   C(2) C(3) C(4) C(5) . . . . 0(1) no

   C(3) C(2) C(1) C(6) . . . . 176(1) no

   C(3) C(4) C(5) C(18) . . . . 179(1) no

   C(4) C(5) C(18) C(20) . . . . -146(1) no

   C(4) C(5) C(18) C(25) . . . . 93(1) no

   C(5) N(1) C(1) C(6) . . . . 178(1) no

   C(5) C(18) O(2) C(19) . . . . -60(1) no

   C(5) C(18) C(20) C(21) . . . . 138(1) no

   C(5) C(18) C(25) C(26) . . . . -116(1) no

   C(6) C(8) N(2) C(12) . . . . 177(1) no

   C(6) C(8) C(9) C(10) . . . . -177(1) no

   C(6) C(13) N(3) C(17) . . . . -176(1) no

   C(6) C(13) C(14) C(15) . . . . 175(1) no

   C(7) O(1) C(6) C(8) . . . . -163(1) no

   C(7) O(1) C(6) C(13) . . . . -41(1) no

   C(8) N(2) C(12) C(11) . . . . 0(1) no

   C(8) C(6) C(13) C(14) . . . . 30(1) no

   C(8) C(9) C(10) C(11) . . . . -1(1) no

   C(9) C(8) N(2) C(12) . . . . -1(1) no

   C(9) C(8) C(6) C(13) . . . . -120(1) no

   C(9) C(10) C(11) C(12) . . . . 0(1) no

   C(13) N(3) C(17) C(16) . . . . -1(2) no

   C(13) C(14) C(15) C(16) . . . . 1(1) no

   C(14) C(13) N(3) C(17) . . . . 1(1) no

   C(14) C(15) C(16) C(17) . . . . -1(2) no

   C(18) C(20) N(4) C(24) . . . . 177(1) no

   C(18) C(20) C(21) C(22) . . . . -179(1) no

   C(18) C(25) N(5) C(29) . . . . 179(1) no

   C(18) C(25) C(26) C(27) . . . . 180(1) no

   C(19) O(2) C(18) C(20) . . . . 68(1) no

   C(19) O(2) C(18) C(25) . . . . -176(1) no

   C(20) N(4) C(24) C(23) . . . . 4(1) no

   C(20) C(18) C(25) C(26) . . . . 118(1) no

   C(20) C(21) C(22) C(23) . . . . -0(1) no

   C(21) C(20) N(4) C(24) . . . . -6(1) no

   C(21) C(20) C(18) C(25) . . . . -102(1) no

   C(21) C(22) C(23) C(24) . . . . -2(1) no

   C(25) N(5) C(29) C(28) . . . . 1(1) no

   C(25) C(26) C(27) C(28) . . . . 1(1) no

   C(26) C(25) N(5) C(29) . . . . -2(1) no

   C(26) C(27) C(28) C(29) . . . . -1(1) no

#------------------------------------------------------------------------------


#==============================================================================

# Additional structures and associated data_? identifiers

# should be added at this point if there is more than one

# structure analysis in the CIF.

#===END

data_General


#==============================================================================


_audit_creation_date                  '19100-08-31'

_audit_creation_method                'by teXsan for Windows v1.0'

_audit_update_record

;

?

;


#==============================================================================


# SUBMISSION DETAILS


_publ_requested_journal               ' ENTER JOURNAL NAME HERE'


_publ_requested_category            ' CHOOSE FI FM FO CI CM CO or AD'


_publ_contact_author_name           ' ENTER CONTACT NAME HERE'


_publ_contact_author_address

;

      ENTER ADDRESS

;

_publ_contact_letter

;

      ENTER TEXT OF LETTER

;


_publ_requested_coeditor_name          ?

_publ_contact_author_phone            ' ENTER PHONE NUMBER '

_publ_contact_author_fax              ' ENTER FAX NUMBER '

_publ_contact_author_email            ' ENTER EMAIL ADDRESS '


#==============================================================================


# PROCESSING SUMMARY (IUCr Office Use Only)


_journal_date_recd_electronic     ?

_journal_date_to_coeditor         ?

_journal_date_from_coeditor       ?

_journal_date_accepted            ?

_journal_date_printers_first      ?

_journal_date_printers_final      ?

_journal_date_proofs_out          ?

_journal_date_proofs_in           ?

_journal_coeditor_name            ?

_journal_coeditor_code            ?

_journal_coeditor_notes

; ?

;

_journal_techeditor_code          ?

_journal_techeditor_notes

; ?

;

_journal_coden_ASTM               ?

_journal_name_full                ?

_journal_year                     ?

_journal_volume                   ?

_journal_issue                    ?

_journal_page_first               ?

_journal_page_last                ?

_journal_suppl_publ_number        ?

_journal_suppl_publ_pages         ?


#==============================================================================


# TITLE AND AUTHOR LIST


_publ_section_title

;

      ENTER SECTION TITLE

;


_publ_section_title_footnote

;

      ENTER ANY FOOTNOTES TO TITLE

;

loop_

_publ_author_name

_publ_author_footnote

_publ_author_address

' FIRST AUTHORS NAME '

;

    FIRST AUTHORS FOOTNOTES

;

;

    FIRST AUTHORS ADDRESS

;


#==============================================================================


# TEXT


_publ_section_abstract

;

      ENTER ABSTRACT

;


_publ_section_exptl_refinement

;

      ENTER EXPERIMENTAL SECTION

;


_publ_section_comment

;

      ENTER TEXT

;


_publ_section_references

;

      ENTER OTHER REFERENCES


Molecular Structure Corporation. (1997-1998). teXsan for Windows version 1.03.

Single Crystal Structure Analysis Software. Version 1.04.

MSC, 3200 Research Forest Drive, The Woodlands, TX 77381, USA.


North, A.C.T., Phillips, D. C. & Mathews, F. S. (1968).

Acta Cryst. A24, 351-359.


Altomare, A., Cascarano, M.,

Giacovazzo, C., Guagliardi, A. (1993).

J. Appl. Cryst., 26, 343.

;


_publ_section_acknowledgements

;

      ENTER ACKNOWLEDGEMENTS

;


_publ_section_table_legends

;

      ENTER TABLE LEGENDS

;


_publ_section_figure_captions

;

      ENTER FIGURE CAPTIONS

;


#==============================================================================


data__RTJII184A________________


#==============================================================================


_computing_data_collection            'MSC/AFC Diffractometer Control'

_computing_cell_refinement            'MSC/AFC Diffractometer Control'

_computing_data_reduction             'teXsan for Windows (MSC, 1997)'

_computing_structure_solution

;

SIR92 (Altomare, et. al. 1993)

;

_computing_structure_refinement       'teXsan for Windows (MSC, 1997)'

_computing_publication_material       'teXsan for Windows (MSC, 1997)'

#------------------------------------------------------------------------------

_cell_length_a                         12.8011

_cell_length_b                         14.3871

_cell_length_c                         16.5479

_cell_angle_alpha                      89

_cell_angle_beta                       101

_cell_angle_gamma                      90

_cell_volume                           2987.72021(3)

_cell_formula_units_Z                  4

_cell_measurement_temperature          296.2

_cell_measurement_reflns_used          888

_cell_measurement_theta_min            2.88

_cell_measurement_theta_max            24.97

#------------------------------------------------------------------------------

_symmetry_cell_setting                 monoclinic

_symmetry_space_group_name_H-M        'P 21/n     '

_symmetry_Int_Tables_number            14

_symmetry_space_group_name_Hall        ?

loop_

_symmetry_equiv_pos_as_xyz

    '   +x,   +y,   +z'

    '1/2-x,1/2+y,1/2-z'

    '   -x,   -y,   -z'

    '1/2+x,1/2-y,1/2+z'

#------------------------------------------------------------------------------


_publ_section_exptl_prep

;

      ENTER EXPERIMENTAL SECTION

;

_exptl_crystal_description            'NONE'

_exptl_crystal_colour                 'NONE'

_exptl_crystal_size_max                .20

_exptl_crystal_size_mid                .30

_exptl_crystal_size_min                .45

_exptl_crystal_density_diffrn          1.481

_exptl_crystal_density_meas            'not measured'

_chemical_formula_weight               666.39

_chemical_formula_analytical           ?

_chemical_formula_sum                  'C31 H33 Cl2 Fe N5 O4 '

_chemical_formula_moiety               '?'

_chemical_formula_structural           ?

_chemical_compound_source              ?

_exptl_crystal_F_000                   1384.00

_exptl_absorpt_coefficient_mu          0.729

_exptl_absorpt_correction_type

;

\y scans (North,Phillips & Matthews, 1968)

;

_exptl_absorpt_correction_T_max        1.000

_exptl_absorpt_correction_T_min        0.857

_exptl_special_details

;

   ?

;


#==============================================================================


# EXPERIMENTAL DATA


_diffrn_special_details

;

   ?

;

_diffrn_ambient_temperature            296.2

_diffrn_radiation_wavelength           0.7107

_diffrn_radiation_type                 'Mo K\a'

_diffrn_radiation_source              'X-ray tube'

_diffrn_radiation_monochromator        graphite

_diffrn_radiation_detector            'scintillation counter'

_diffrn_measurement_device            'CAD4'

_diffrn_measurement_method            \w-2\q


_diffrn_standards_number              3

_diffrn_standards_interval_count      0

_diffrn_standards_decay_%             -4.81

loop_

_diffrn_standard_refln_index_h

_diffrn_standard_refln_index_k

_diffrn_standard_refln_index_l

        3       2      0

        1      -2     -4

        2      -8      10

_diffrn_reflns_number                  5651

_reflns_number_total                   5507

_reflns_number_gt                      5271

_reflns_threshold_expression           I>0.00\s(I)

_diffrn_reflns_av_R_equivalents        0.03474

_diffrn_reflns_av_sigmaI/netI          0.128

_diffrn_reflns_limit_h_min             -15

_diffrn_reflns_limit_h_max             14

_diffrn_reflns_limit_k_min             -17

_diffrn_reflns_limit_k_max             0

_diffrn_reflns_limit_l_min             0

_diffrn_reflns_limit_l_max             19

_diffrn_reflns_theta_min               2.88

_diffrn_reflns_theta_max               24.97

_diffrn_reflns_reduction_process      'Lp corrections applied'

_diffrn_orient_matrix_UB_11            0.07374

_diffrn_orient_matrix_UB_12            0.01801

_diffrn_orient_matrix_UB_13           -0.00549

_diffrn_orient_matrix_UB_21            0.00143

_diffrn_orient_matrix_UB_22            0.04867

_diffrn_orient_matrix_UB_23            0.04333

_diffrn_orient_matrix_UB_31            0.03016

_diffrn_orient_matrix_UB_32           -0.04623

_diffrn_orient_matrix_UB_33            0.04350

#------------------------------------------------------------------------------

loop_

_atom_type_symbol

_atom_type_oxidation_number

_atom_type_number_in_cell

_atom_type_scat_dispersion_real

_atom_type_scat_dispersion_imag

_atom_type_scat_source

    C  0   124 0.002 0.002

;International Tables for Crystallography

(1992, Vol. C, Table 6.1.1.2)

;

    H  0   132 0.000 0.000

;International Tables for Crystallography

(1992, Vol. C, Table 6.1.1.2)

;

    O  0    16 0.008 0.006

;International Tables for Crystallography

(1992, Vol. C, Table 6.1.1.2)

;

    N  0    20 0.004 0.003

;International Tables for Crystallography

(1992, Vol. C, Table 6.1.1.2)

;

    Cl 0     8 0.132 0.159

;International Tables for Crystallography

(1992, Vol. C, Tables 4.2.6.8 and 6.1.1.1)

;

    Fe 0     4 0.301 0.845

;International Tables for Crystallography

(1992, Vol. C, Tables 4.2.6.8 and 6.1.1.1)

;


#==============================================================================


# ATOMIC COORDINATES AND THERMAL PARAMETERS


loop_

_atom_site_label

_atom_site_fract_x

_atom_site_fract_y

_atom_site_fract_z

_atom_site_U_iso_or_equiv

_atom_site_occupancy

_atom_site_refinement_flags

_atom_site_adp_type

_atom_site_calc_flag

_atom_site_calc_attached_atom

Fe(0) 0.30474(4) 0.14273(4) 0.13556(3) 0.0213(2) 1.000   .  Uani d ?

Cl(1) 0.44240(8) 0.24234(8) 0.12209(7) 0.0320(3) 1.000   .  Uani d ?

Cl(2) 0.70779(9) 0.04769(10) 0.28815(8) 0.0627(5) 1.000   .  Uani d ?

O(1) 0.0892(2) 0.1425(2) 0.3323(1) 0.0279(8) 1.000   .  Uani d ?

O(2) 0.1718(2) -0.1210(2) -0.0120(2) 0.0266(8) 1.000   .  Uani d ?

O(3) 0.7559(3) 0.0623(3) 0.4719(2) 0.089(2) 1.000   .  Uani d ?

O(5) 0.3199(8) 0.1638(9) 0.7081(7) 0.064(4) 0.300   S Uani d ?

O(6) 0.3027(6) 0.1572(5) 0.6196(4) 0.114(3) 0.700   S Uani d ?

N(1) 0.1764(2) 0.0481(2) 0.1524(2) 0.0185(9) 1.000   .  Uani d ?

N(2) 0.1935(2) 0.2454(2) 0.1628(2) 0.0224(10) 1.000   .  Uani d ?

N(3) 0.3459(2) 0.1382(2) 0.2759(2) 0.0214(9) 1.000   .  Uani d ?

N(4) 0.3850(2) 0.0139(2) 0.1042(2) 0.0211(9) 1.000   .  Uani d ?

N(5) 0.2258(2) 0.1288(2) 0.0056(2) 0.0223(10) 1.000   .  Uani d ?

C(1) 0.1433(3) 0.0516(3) 0.2245(2) 0.0183(11) 1.000   .  Uani d ?

C(2) 0.1114(3) -0.0269(3) 0.2611(2) 0.0270(13) 1.000   .  Uani d ?

C(3) 0.1107(3) -0.1105(3) 0.2213(3) 0.0267(13) 1.000   .  Uani d ?

C(4) 0.1402(3) -0.1144(3) 0.1457(2) 0.0253(12) 1.000   .  Uani d ?

C(5) 0.1711(3) -0.0330(3) 0.1124(2) 0.0169(11) 1.000   .  Uani d ?

C(6) 0.1554(3) 0.1435(3) 0.2728(2) 0.0217(11) 1.000   .  Uani d ?

C(7) -0.0238(3) 0.1308(3) 0.3017(2) 0.040(1) 1.000   .  Uani d ?

C(8) 0.1381(3) 0.2337(3) 0.2220(2) 0.0212(11) 1.000   .  Uani d ?

C(9) 0.0737(3) 0.3041(3) 0.2429(2) 0.031(1) 1.000   .  Uani d ?

C(10) 0.0621(3) 0.3857(3) 0.1990(3) 0.036(2) 1.000   .  Uani d ?

C(11) 0.1185(3) 0.3980(3) 0.1377(2) 0.0315(13) 1.000   .  Uani d ?

C(12) 0.1848(3) 0.3273(3) 0.1225(2) 0.0243(12) 1.000   .  Uani d ?

C(13) 0.2705(3) 0.1433(3) 0.3225(2) 0.0216(11) 1.000   .  Uani d ?

C(14) 0.2935(3) 0.1450(3) 0.4071(2) 0.0272(12) 1.000   .  Uani d ?

C(15) 0.3983(3) 0.1413(3) 0.4472(2) 0.0302(12) 1.000   .  Uani d ?

C(16) 0.4773(3) 0.1368(3) 0.4013(2) 0.0277(12) 1.000   .  Uani d ?

C(17) 0.4483(3) 0.1352(3) 0.3165(2) 0.0250(12) 1.000   .  Uani d ?

C(18) 0.2125(3) -0.0399(3) 0.0317(2) 0.0217(11) 1.000   .  Uani d ?

C(19) 0.0576(3) -0.1259(3) -0.0379(2) 0.0344(13) 1.000   .  Uani d ?

C(20) 0.3336(3) -0.0539(3) 0.0563(2) 0.0209(11) 1.000   .  Uani d ?

C(21) 0.3844(3) -0.1292(3) 0.0306(2) 0.0277(13) 1.000   .  Uani d ?

C(22) 0.4938(3) -0.1363(3) 0.0550(2) 0.0316(13) 1.000   .  Uani d ?

C(23) 0.5476(3) -0.0689(3) 0.1041(2) 0.0281(13) 1.000   .  Uani d ?

C(24) 0.4915(3) 0.0058(3) 0.1267(2) 0.0270(12) 1.000   .  Uani d ?

C(25) 0.1963(3) 0.0445(3) -0.0268(2) 0.0214(12) 1.000   .  Uani d ?

C(26) 0.1663(3) 0.0321(3) -0.1115(2) 0.0283(13) 1.000   .  Uani d ?

C(27) 0.1613(3) 0.1078(3) -0.1632(2) 0.0306(13) 1.000   .  Uani d ?

C(28) 0.1879(3) 0.1946(3) -0.1311(3) 0.0332(13) 1.000   .  Uani d ?

C(29) 0.2218(3) 0.2012(3) -0.0467(3) 0.0296(13) 1.000   .  Uani d ?

C(30) 0.8614(5) 0.0339(4) 0.4923(3) 0.077(2) 1.000   .  Uani d ?

C(31) 0.2530(5) 0.2170(5) 0.6573(4) 0.087(3) 1.000   .  Uani d ?

H(1) 0.0897 -0.0230 0.3130 0.033 1.000   .  Uiso c ?

H(2) 0.0897 -0.1654 0.2457 0.032 1.000   .  Uiso c ?

H(3) 0.1397 -0.1717 0.1173 0.031 1.000   .  Uiso c ?

H(4) -0.0443 0.0702 0.3168 0.048 1.000   .  Uiso c ?

H(5) -0.0617 0.1758 0.3270 0.048 1.000   .  Uiso c ?

H(7) 0.0373 0.2954 0.2872 0.038 1.000   .  Uiso c ?

H(8) 0.0165 0.4331 0.2114 0.043 1.000   .  Uiso c ?

H(9) 0.1114 0.4535 0.1060 0.037 1.000   .  Uiso c ?

H(10) 0.2260 0.3365 0.0813 0.029 1.000   .  Uiso c ?

H(11) 0.2382 0.1500 0.4376 0.032 1.000   .  Uiso c ?

H(12) 0.4166 0.1416 0.5059 0.036 1.000   .  Uiso c ?

H(13) 0.5501 0.1345 0.4278 0.033 1.000   .  Uiso c ?

H(14) 0.5031 0.1321 0.2853 0.030 1.000   .  Uiso c ?

H(15) 0.0258 -0.1233 0.0095 0.042 1.000   .  Uiso c ?

H(16) 0.0389 -0.1830 -0.0658 0.042 1.000   .  Uiso c ?

H(17) 0.0333 -0.0757 -0.0733 0.042 1.000   .  Uiso c ?

H(18) 0.3450 -0.1757 -0.0029 0.033 1.000   .  Uiso c ?

H(19) 0.5308 -0.1873 0.0380 0.038 1.000   .  Uiso c ?

H(20) 0.6224 -0.0733 0.1227 0.033 1.000   .  Uiso c ?

H(21) 0.5300 0.0534 0.1601 0.033 1.000   .  Uiso c ?

H(22) 0.1491 -0.0282 -0.1337 0.034 1.000   .  Uiso c ?

H(23) 0.1390 0.0993 -0.2211 0.038 1.000   .  Uiso c ?

H(24) 0.1835 0.2475 -0.1660 0.040 1.000   .  Uiso c ?

H(25) 0.2427 0.2605 -0.0241 0.035 1.000   .  Uiso c ?

H(26) 0.9080 0.0864 0.4938 0.092 1.000   .  Uiso c ?

H(27) 0.8771 -0.0090 0.4526 0.092 1.000   .  Uiso c ?

H(28) 0.8755 0.0051 0.5453 0.092 1.000   .  Uiso c ?

H(34) -0.0396 0.1375 0.2444 0.048 1.000   .  Uiso c ?


loop_

_atom_site_aniso_label

_atom_site_aniso_U_11

_atom_site_aniso_U_22

_atom_site_aniso_U_33

_atom_site_aniso_U_12

_atom_site_aniso_U_13

_atom_site_aniso_U_23

   Fe(0)  0.0198(3)   0.0228(3)   0.0218(3)   -0.0004(3)  0.0056(2)   -0.0015(3)

   Cl(1)  0.0298(6)   0.0333(6)   0.0361(6)   -0.0074(5)  0.0143(5)   -0.0055(6)

   Cl(2)  0.0381(7)   0.0933(11)  0.0516(9)   0.0113(8)   -0.0040(6)  -0.0204(8)

   O(1)   0.023(2)    0.038(2)    0.025(2)    -0.003(2)   0.0091(12)  -0.004(2)

   O(2)   0.024(2)    0.027(2)    0.027(2)    -0.0009(13) -0.0003(13) 
-0.0102(13)

   O(3)   0.096(3)    0.104(4)    0.071(3)    0.044(3)    0.027(3)    -0.013(3)

   O(5)   0.027(6)    0.079(10)   0.078(9)    -0.026(7)   -0.012(6)   0.004(8)

   O(6)   0.130(6)    0.133(6)    0.093(6)    -0.020(5)   0.060(5)    -0.004(5)

   N(1)   0.015(2)    0.021(2)    0.019(2)    0.005(2)    0.001(1)    0.000(2)

   N(2)   0.020(2)    0.028(2)    0.020(2)    0.002(2)    0.006(2)    -0.001(2)

   N(3)   0.018(2)    0.021(2)    0.023(2)    -0.002(2)   0.001(2)    0.000(2)

   N(4)   0.015(2)    0.025(2)    0.023(2)    0.002(2)    0.003(2)    -0.001(2)

   N(5)   0.022(2)    0.023(2)    0.022(2)    0.002(2)    0.004(2)    -0.004(2)

   C(1)   0.011(2)    0.022(2)    0.022(2)    0.004(2)    0.003(2)    -0.003(2)

   C(2)   0.026(2)    0.031(3)    0.024(2)    -0.003(2)   0.006(2)    -0.000(2)

   C(3)   0.021(2)    0.027(3)    0.031(3)    -0.009(2)   0.003(2)    0.008(2)

   C(4)   0.022(2)    0.024(3)    0.029(3)    0.002(2)    0.001(2)    -0.005(2)

   C(5)   0.010(2)    0.021(2)    0.019(2)    0.001(2)    -0.000(2)   -0.001(2)

   C(6)   0.021(2)    0.028(2)    0.018(2)    -0.005(2)   0.007(2)    -0.001(2)

   C(7)   0.028(3)    0.057(3)    0.038(3)    -0.011(3)   0.016(2)    -0.008(3)

   C(8)   0.017(2)    0.023(2)    0.021(2)    0.001(2)    -0.002(2)   -0.010(2)

   C(9)   0.031(3)    0.037(3)    0.028(3)    0.006(2)    0.013(2)    -0.000(2)

   C(10)  0.035(3)    0.031(3)    0.041(3)    0.011(2)    0.005(2)    -0.004(2)

   C(11)  0.044(3)    0.024(3)    0.025(3)    0.007(2)    0.002(2)    -0.001(2)

   C(12)  0.031(3)    0.023(3)    0.020(2)    -0.003(2)   0.007(2)    -0.002(2)

   C(13)  0.025(2)    0.018(2)    0.021(2)    -0.001(2)   0.001(2)    0.000(2)

   C(14)  0.028(2)    0.025(2)    0.027(2)    -0.001(2)   0.004(2)    -0.002(2)

   C(15)  0.037(3)    0.025(2)    0.024(2)    -0.003(2)   -0.004(2)   -0.001(2)

   C(16)  0.026(2)    0.027(3)    0.027(2)    -0.000(2)   -0.003(2)   -0.004(2)

   C(17)  0.023(2)    0.018(2)    0.034(2)    0.001(2)    0.006(2)    -0.001(2)

   C(18)  0.023(2)    0.022(2)    0.021(2)    -0.001(2)   0.005(2)    0.000(2)

   C(19)  0.029(3)    0.036(3)    0.031(3)    -0.004(2)   -0.010(2)   -0.007(2)

   C(20)  0.021(2)    0.025(3)    0.018(2)    0.003(2)    0.006(2)    0.002(2)

   C(21)  0.031(3)    0.029(3)    0.024(2)    0.001(2)    0.007(2)    -0.006(2)

   C(22)  0.031(3)    0.038(3)    0.027(2)    0.018(2)    0.009(2)    0.003(2)

   C(23)  0.016(2)    0.039(3)    0.028(3)    0.008(2)    0.001(2)    0.003(2)

   C(24)  0.023(2)    0.036(3)    0.020(2)    -0.003(2)   -0.001(2)   0.002(2)

   C(25)  0.016(2)    0.029(3)    0.021(2)    0.006(2)    0.007(2)    0.001(2)

   C(26)  0.026(2)    0.036(3)    0.024(3)    -0.004(2)   0.008(2)    -0.003(2)

   C(27)  0.021(2)    0.054(3)    0.015(2)    -0.000(2)   0.001(2)    -0.001(2)

   C(28)  0.032(3)    0.038(3)    0.030(3)    0.009(3)    0.007(2)    0.007(3)

   C(29)  0.034(3)    0.027(3)    0.029(3)    0.008(2)    0.009(2)    0.001(2)

   C(30)  0.132(6)    0.064(4)    0.039(4)    0.001(4)    0.023(4)    -0.003(3)

   C(31)  0.088(5)    0.127(7)    0.056(4)    0.026(5)    0.035(4)    0.013(4)


#==============================================================================


# REFINEMENT DATA


_refine_special_details

;

   ?

;

_refine_ls_structure_factor_coef       Fsqd

_refine_ls_matrix_type                 full

_refine_ls_weighting_scheme            sigma

_refine_ls_weighting_details           'w = 1/[\s^2^(Fo) + 0.00001|Fo|^2^]'

_refine_ls_hydrogen_treatment          noref

_refine_ls_extinction_method           none

_refine_ls_extinction_coef             ?

_refine_ls_abs_structure_details       ?

_refine_ls_abs_structure_Flack         ?

_refine_ls_number_reflns               5271

_refine_ls_number_parameters           397

_refine_ls_number_restraints           0

_refine_ls_number_constraints          0

_refine_ls_R_factor_all                0.0986

_refine_ls_R_factor_gt                 ?

_refine_ls_wR_factor_all               0.0910

_refine_ls_wR_factor_ref               ?

_refine_ls_goodness_of_fit_all         1.308

_refine_ls_goodness_of_fit_ref         1.310

_refine_ls_shift/su_max                0.2000

_refine_ls_shift/su_mean               0.0233

_refine_diff_density_min               0.00

_refine_diff_density_max               0.00


#==============================================================================


# MOLECULAR GEOMETRY


_geom_special_details

;

   ?

;

loop_

_geom_bond_atom_site_label_1

_geom_bond_atom_site_label_2

_geom_bond_distance

_geom_bond_site_symmetry_1

_geom_bond_site_symmetry_2

_geom_bond_publ_flag

   Fe Cl(1) 2.3153(13) . . ?

   Fe N(1) 2.193(3) . . ?

   Fe N(2) 2.161(4) . . ?

   Fe N(3) 2.279(3) . . ?

   Fe N(4) 2.230(3) . . ?

   Fe N(5) 2.198(3) . . ?

   O(1) C(6) 1.420(4) . . ?

   O(1) C(7) 1.445(5) . . ?

   O(2) C(18) 1.418(5) . . ?

   O(2) C(19) 1.441(5) . . ?

   O(3) C(30) 1.388(7) . . ?

   O(5) O(6) 1.44(1) . . ?

   O(5) C(31) 1.320(13) . . ?

   O(6) C(31) 1.301(9) . . ?

   N(1) C(1) 1.344(5) . . ?

   N(1) C(5) 1.338(5) . . ?

   N(2) C(8) 1.329(5) . . ?

   N(2) C(12) 1.348(5) . . ?

   N(3) C(13) 1.351(5) . . ?

   N(3) C(17) 1.350(5) . . ?

   N(4) C(20) 1.344(5) . . ?

   N(4) C(24) 1.346(5) . . ?

   N(5) C(25) 1.349(5) . . ?

   N(5) C(29) 1.348(5) . . ?

   C(1) C(2) 1.380(6) . . ?

   C(1) C(6) 1.537(6) . . ?

   C(2) C(3) 1.370(6) . . ?

   C(2) H(1) 0.96 . . no

   C(3) C(4) 1.377(6) . . ?

   C(3) H(2) 0.95 . . no

   C(4) C(5) 1.384(6) . . ?

   C(4) H(3) 0.95 . . no

   C(5) C(18) 1.534(5) . . ?

   C(6) C(8) 1.538(6) . . ?

   C(6) C(13) 1.539(5) . . ?

   C(7) H(4) 0.96 . . no

   C(7) H(5) 0.95 . . no

   C(7) H(34) 0.93 . . no

   C(8) C(9) 1.392(6) . . ?

   C(9) C(10) 1.373(6) . . ?

   C(9) H(7) 0.95 . . no

   C(10) C(11) 1.368(6) . . ?

   C(10) H(8) 0.95 . . no

   C(11) C(12) 1.379(6) . . ?

   C(11) H(9) 0.95 . . no

   C(12) H(10) 0.95 . . no

   C(13) C(14) 1.374(5) . . ?

   C(14) C(15) 1.376(6) . . ?

   C(14) H(11) 0.95 . . no

   C(15) C(16) 1.380(6) . . ?

   C(15) H(12) 0.95 . . no

   C(16) C(17) 1.379(5) . . ?

   C(16) H(13) 0.95 . . no

   C(17) H(14) 0.95 . . no

   C(18) C(20) 1.536(5) . . ?

   C(18) C(25) 1.541(6) . . ?

   C(19) H(15) 0.95 . . no

   C(19) H(16) 0.95 . . no

   C(19) H(17) 0.94 . . no

   C(20) C(21) 1.374(6) . . ?

   C(21) C(22) 1.382(6) . . ?

   C(21) H(18) 0.95 . . no

   C(22) C(23) 1.362(6) . . ?

   C(22) H(19) 0.95 . . no

   C(23) C(24) 1.384(6) . . ?

   C(23) H(20) 0.95 . . no

   C(24) H(21) 0.95 . . no

   C(25) C(26) 1.389(6) . . ?

   C(26) C(27) 1.379(6) . . ?

   C(26) H(22) 0.95 . . no

   C(27) C(28) 1.374(6) . . ?

   C(27) H(23) 0.95 . . no

   C(28) C(29) 1.381(6) . . ?

   C(28) H(24) 0.95 . . no

   C(29) H(25) 0.95 . . no

   C(30) H(26) 0.96 . . no

   C(30) H(27) 0.95 . . no

   C(30) H(28) 0.95 . . no

#------------------------------------------------------------------------------

loop_

_geom_angle_atom_site_label_1

_geom_angle_atom_site_label_2

_geom_angle_atom_site_label_3

_geom_angle

_geom_angle_site_symmetry_1

_geom_angle_site_symmetry_2

_geom_angle_site_symmetry_3

_geom_angle_publ_flag

   Cl(1) Fe  N(1) 178.23(10) . . . ?

   Cl(1) Fe  N(2) 98.21(10) . . . ?

   Cl(1) Fe  N(3) 95.06(9) . . . ?

   Cl(1) Fe  N(4) 95.59(10) . . . ?

   Cl(1) Fe  N(5) 100.01(10) . . . ?

   N(1) Fe  N(2) 81.74(12) . . . ?

   N(1) Fe  N(3) 83.18(12) . . . ?

   N(1) Fe  N(4) 84.55(13) . . . ?

   N(1) Fe  N(5) 81.76(13) . . . ?

   N(2) Fe  N(3) 80.57(13) . . . ?

   N(2) Fe  N(4) 165.94(13) . . . ?

   N(2) Fe  N(5) 94.12(13) . . . ?

   N(3) Fe  N(4) 100.89(13) . . . ?

   N(3) Fe  N(5) 164.62(13) . . . ?

   N(4) Fe  N(5) 80.82(13) . . . ?

   C(6) O(1)  C(7) 116.8(3) . . . ?

   C(18) O(2)  C(19) 116.1(3) . . . ?

   O(6) O(5)  C(31) 56.0(7) . . . ?

   O(5) O(6)  C(31) 57.3(7) . . . ?

   Fe N(1)  C(1) 117.7(3) . . . ?

   Fe N(1)  C(5) 116.4(3) . . . ?

   C(1) N(1)  C(5) 118.7(4) . . . ?

   Fe N(2)  C(8) 122.5(3) . . . ?

   Fe N(2)  C(12) 119.2(3) . . . ?

   C(8) N(2)  C(12) 118.1(4) . . . ?

   Fe N(3)  C(13) 122.1(3) . . . ?

   Fe N(3)  C(17) 121.0(3) . . . ?

   C(13) N(3)  C(17) 116.8(4) . . . ?

   Fe N(4)  C(20) 123.1(3) . . . ?

   Fe N(4)  C(24) 119.7(3) . . . ?

   C(20) N(4)  C(24) 116.8(4) . . . ?

   Fe N(5)  C(25) 120.6(3) . . . ?

   Fe N(5)  C(29) 120.6(3) . . . ?

   C(25) N(5)  C(29) 117.8(4) . . . ?

   N(1) C(1)  C(2) 122.0(4) . . . ?

   N(1) C(1)  C(6) 118.5(4) . . . ?

   C(2) C(1)  C(6) 119.0(4) . . . ?

   C(1) C(2)  C(3) 118.8(4) . . . ?

   C(1) C(2)  H(1) 120.6 . . . no

   C(3) C(2)  H(1) 120.6 . . . no

   C(2) C(3)  C(4) 119.7(4) . . . ?

   C(2) C(3)  H(2) 120.1 . . . no

   C(4) C(3)  H(2) 120.2 . . . no

   C(3) C(4)  C(5) 118.6(4) . . . ?

   C(3) C(4)  H(3) 120.6 . . . no

   C(5) C(4)  H(3) 120.8 . . . no

   N(1) C(5)  C(4) 122.0(4) . . . ?

   N(1) C(5)  C(18) 119.7(4) . . . ?

   C(4) C(5)  C(18) 117.9(4) . . . ?

   O(1) C(6)  C(1) 109.8(4) . . . ?

   O(1) C(6)  C(8) 110.2(4) . . . ?

   O(1) C(6)  C(13) 105.6(3) . . . ?

   C(1) C(6)  C(8) 116.9(3) . . . ?

   C(1) C(6)  C(13) 105.2(4) . . . ?

   C(8) C(6)  C(13) 108.3(4) . . . ?

   O(1) C(7)  H(4) 108.7 . . . no

   O(1) C(7)  H(5) 109.2 . . . no

   O(1) C(7)  H(34) 110.2 . . . no

   H(4) C(7)  H(5) 108.3 . . . no

   H(4) C(7)  H(34) 110.0 . . . no

   H(5) C(7)  H(34) 110.4 . . . no

   N(2) C(8)  C(6) 118.0(4) . . . ?

   N(2) C(8)  C(9) 121.3(4) . . . ?

   C(6) C(8)  C(9) 120.4(4) . . . ?

   C(8) C(9)  C(10) 119.9(4) . . . ?

   C(8) C(9)  H(7) 120.0 . . . no

   C(10) C(9)  H(7) 120.1 . . . no

   C(9) C(10)  C(11) 119.0(4) . . . ?

   C(9) C(10)  H(8) 120.5 . . . no

   C(11) C(10)  H(8) 120.5 . . . no

   C(10) C(11)  C(12) 118.3(4) . . . ?

   C(10) C(11)  H(9) 120.7 . . . no

   C(12) C(11)  H(9) 121.0 . . . no

   N(2) C(12)  C(11) 123.2(4) . . . ?

   N(2) C(12)  H(10) 118.2 . . . no

   C(11) C(12)  H(10) 118.6 . . . no

   N(3) C(13)  C(6) 114.4(3) . . . ?

   N(3) C(13)  C(14) 123.3(4) . . . ?

   C(6) C(13)  C(14) 122.3(4) . . . ?

   C(13) C(14)  C(15) 118.9(4) . . . ?

   C(13) C(14)  H(11) 120.7 . . . no

   C(15) C(14)  H(11) 120.4 . . . no

   C(14) C(15)  C(16) 119.2(4) . . . ?

   C(14) C(15)  H(12) 120.7 . . . no

   C(16) C(15)  H(12) 120.1 . . . no

   C(15) C(16)  C(17) 118.8(4) . . . ?

   C(15) C(16)  H(13) 120.4 . . . no

   C(17) C(16)  H(13) 120.8 . . . no

   N(3) C(17)  C(16) 123.1(4) . . . ?

   N(3) C(17)  H(14) 118.6 . . . no

   C(16) C(17)  H(14) 118.3 . . . no

   O(2) C(18)  C(5) 110.0(3) . . . ?

   O(2) C(18)  C(20) 106.1(3) . . . ?

   O(2) C(18)  C(25) 109.8(3) . . . ?

   C(5) C(18)  C(20) 106.3(3) . . . ?

   C(5) C(18)  C(25) 118.0(4) . . . ?

   C(20) C(18)  C(25) 105.9(3) . . . ?

   O(2) C(19)  H(15) 109.1 . . . no

   O(2) C(19)  H(16) 109.2 . . . no

   O(2) C(19)  H(17) 109.8 . . . no

   H(15) C(19)  H(16) 109.1 . . . no

   H(15) C(19)  H(17) 109.8 . . . no

   H(16) C(19)  H(17) 109.9 . . . no

   N(4) C(20)  C(18) 114.3(4) . . . ?

   N(4) C(20)  C(21) 123.3(4) . . . ?

   C(18) C(20)  C(21) 122.4(4) . . . ?

   C(20) C(21)  C(22) 118.8(4) . . . ?

   C(20) C(21)  H(18) 120.5 . . . no

   C(22) C(21)  H(18) 120.7 . . . no

   C(21) C(22)  C(23) 119.0(4) . . . ?

   C(21) C(22)  H(19) 120.5 . . . no

   C(23) C(22)  H(19) 120.4 . . . no

   C(22) C(23)  C(24) 119.1(4) . . . ?

   C(22) C(23)  H(20) 120.3 . . . no

   C(24) C(23)  H(20) 120.6 . . . no

   N(4) C(24)  C(23) 122.9(4) . . . ?

   N(4) C(24)  H(21) 118.5 . . . no

   C(23) C(24)  H(21) 118.6 . . . no

   N(5) C(25)  C(18) 117.8(4) . . . ?

   N(5) C(25)  C(26) 121.1(4) . . . ?

   C(18) C(25)  C(26) 120.5(4) . . . ?

   C(25) C(26)  C(27) 119.6(4) . . . ?

   C(25) C(26)  H(22) 120.3 . . . no

   C(27) C(26)  H(22) 120.1 . . . no

   C(26) C(27)  C(28) 120.0(4) . . . ?

   C(26) C(27)  H(23) 119.4 . . . no

   C(28) C(27)  H(23) 120.6 . . . no

   C(27) C(28)  C(29) 117.3(5) . . . ?

   C(27) C(28)  H(24) 120.8 . . . no

   C(29) C(28)  H(24) 121.9 . . . no

   N(5) C(29)  C(28) 124.1(4) . . . ?

   N(5) C(29)  H(25) 118.0 . . . no

   C(28) C(29)  H(25) 117.9 . . . no

   O(3) C(30)  H(26) 110.1 . . . no

   O(3) C(30)  H(27) 110.6 . . . no

   O(3) C(30)  H(28) 110.5 . . . no

   H(26) C(30)  H(27) 108.4 . . . no

   H(26) C(30)  H(28) 108.2 . . . no

   H(27) C(30)  H(28) 109.0 . . . no

   O(5) C(31)  O(6) 66.7(8) . . . ?

#------------------------------------------------------------------------------

loop_

_geom_contact_atom_site_label_1

_geom_contact_atom_site_label_2

_geom_contact_distance

_geom_contact_site_symmetry_1

_geom_contact_site_symmetry_2

_geom_contact_publ_flag

   Cl(1)     C(3)      3.516(5)   . 2 no

   Cl(1)     C(22)     3.540(5)   . 3_655 no

   Cl(2)     O(3)      2.989(4)   . . no

   Cl(2)     O(5)      3.07(1)    . 3_656 no

   Cl(2)     O(6)      3.333(8)   . 3_656 no

   Cl(2)     C(24)     3.499(4)   . . no

   Cl(2)     C(30)     3.563(6)   . . no

   O(3)      C(12)     3.234(6)   . 4 no

   O(3)      C(29)     3.436(7)   . 4 no

   O(3)      O(6)      3.519(9)   . 3_656 no

   O(3)      C(11)     3.585(6)   . 4 no

   O(5)      C(10)     3.21(1)    . 4 no

   O(5)      C(9)      3.218(12)  . 4 no

   O(5)      C(27)     3.32(1)    . 1_556 no

   O(5)      C(28)     3.45(2)    . 1_556 no

   O(5)      C(23)     3.51(1)    . 3_656 no

   O(6)      C(15)     3.328(8)   . . no

   O(6)      C(10)     3.378(10)  . 4 no

   O(6)      C(14)     3.500(8)   . . no

   N(1)      C(19)     3.402(5)   . 3 no

   N(2)      C(3)      3.516(6)   . 2 no

   C(2)      C(12)     3.596(6)   . 2_545 no

   C(3)      C(12)     3.415(6)   . 2_545 no

   C(3)      C(27)     3.425(6)   . 3 no

   C(10)     C(24)     3.544(6)   . 2 no

   C(22)     C(24)     3.581(6)   . 3_655 no

#------------------------------------------------------------------------------

loop_

_geom_torsion_atom_site_label_1

_geom_torsion_atom_site_label_2

_geom_torsion_atom_site_label_3

_geom_torsion_atom_site_label_4

_geom_torsion_site_symmetry_1

_geom_torsion_site_symmetry_2

_geom_torsion_site_symmetry_3

_geom_torsion_site_symmetry_4

_geom_torsion

_geom_torsion_publ_flag

   Fe N(1) C(1) C(2) . . . . -144.4(3) no

   Fe N(1) C(1) C(6) . . . . 27.4(5) no

   Fe N(1) C(5) C(4) . . . . 144.7(3) no

   Fe N(1) C(5) C(18) . . . . -28.0(5) no

   Fe N(2) C(8) C(6) . . . . 0.4(5) no

   Fe N(2) C(8) C(9) . . . . 174.5(3) no

   Fe N(2) C(12) C(11) . . . . -177.9(3) no

   Fe N(3) C(13) C(6) . . . . 5.1(6) no

   Fe N(3) C(13) C(14) . . . . -176.9(4) no

   Fe N(3) C(17) C(16) . . . . 176.9(4) no

   Fe N(4) C(20) C(18) . . . . -5.7(5) no

   Fe N(4) C(20) C(21) . . . . 173.7(3) no

   Fe N(4) C(24) C(23) . . . . -175.0(3) no

   Fe N(5) C(25) C(18) . . . . 4.3(5) no

   Fe N(5) C(25) C(26) . . . . -167.0(3) no

   Fe N(5) C(29) C(28) . . . . 170.1(4) no

   Cl(1) Fe N(1) C(1) . . . . 31.8(34) no

   Cl(1) Fe N(1) C(5) . . . . -118.0(31) no

   Cl(1) Fe N(2) C(8) . . . . -135.9(3) no

   Cl(1) Fe N(2) C(12) . . . . 39.3(3) no

   Cl(1) Fe N(3) C(13) . . . . 137.1(4) no

   Cl(1) Fe N(3) C(17) . . . . -39.4(3) no

   Cl(1) Fe N(4) C(20) . . . . -139.3(3) no

   Cl(1) Fe N(4) C(24) . . . . 34.0(3) no

   Cl(1) Fe N(5) C(25) . . . . 133.9(3) no

   Cl(1) Fe N(5) C(29) . . . . -35.0(3) no

   O(1) C(6) C(1) N(1) . . . . 162.7(3) no

   O(1) C(6) C(1) C(2) . . . . -25.2(5) no

   O(1) C(6) C(8) N(2) . . . . -179.4(3) no

   O(1) C(6) C(8) C(9) . . . . 6.4(5) no

   O(1) C(6) C(13) N(3) . . . . 176.0(4) no

   O(1) C(6) C(13) C(14) . . . . -2.0(6) no

   O(2) C(18) C(5) N(1) . . . . -162.8(3) no

   O(2) C(18) C(5) C(4) . . . . 24.2(5) no

   O(2) C(18) C(20) N(4) . . . . -175.1(3) no

   O(2) C(18) C(20) C(21) . . . . 5.5(5) no

   O(2) C(18) C(25) N(5) . . . . 176.8(3) no

   O(2) C(18) C(25) C(26) . . . . -11.9(5) no

   N(1) Fe N(2) C(8) . . . . 42.3(3) no

   N(1) Fe N(2) C(12) . . . . -142.5(3) no

   N(1) Fe N(3) C(13) . . . . -43.1(4) no

   N(1) Fe N(3) C(17) . . . . 140.4(4) no

   N(1) Fe N(4) C(20) . . . . 42.5(3) no

   N(1) Fe N(4) C(24) . . . . -144.2(3) no

   N(1) Fe N(5) C(25) . . . . -46.0(3) no

   N(1) Fe N(5) C(29) . . . . 145.2(3) no

   N(1) C(1) C(2) C(3) . . . . -1.8(7) no

   N(1) C(1) C(6) C(8) . . . . 36.2(5) no

   N(1) C(1) C(6) C(13) . . . . -84.0(4) no

   N(1) C(5) C(4) C(3) . . . . 2.1(6) no

   N(1) C(5) C(18) C(20) . . . . 82.7(5) no

   N(1) C(5) C(18) C(25) . . . . -35.9(5) no

   N(2) Fe N(1) C(1) . . . . -56.7(3) no

   N(2) Fe N(1) C(5) . . . . 153.5(3) no

   N(2) Fe N(3) C(13) . . . . 39.6(4) no

   N(2) Fe N(3) C(17) . . . . -136.9(4) no

   N(2) Fe N(4) C(20) . . . . 29.8(7) no

   N(2) Fe N(4) C(24) . . . . -157.0(5) no

   N(2) Fe N(5) C(25) . . . . -127.0(3) no

   N(2) Fe N(5) C(29) . . . . 64.1(3) no

   N(2) C(8) C(6) C(1) . . . . -53.0(5) no

   N(2) C(8) C(6) C(13) . . . . 65.5(5) no

   N(2) C(8) C(9) C(10) . . . . 3.6(7) no

   N(2) C(12) C(11) C(10) . . . . 2.7(7) no

   N(3) Fe N(1) C(1) . . . . 24.7(3) no

   N(3) Fe N(1) C(5) . . . . -125.1(3) no

   N(3) Fe N(2) C(8) . . . . -42.1(3) no

   N(3) Fe N(2) C(12) . . . . 133.1(3) no

   N(3) Fe N(4) C(20) . . . . 124.5(3) no

   N(3) Fe N(4) C(24) . . . . -62.3(3) no

   N(3) Fe N(5) C(25) . . . . -57.9(6) no

   N(3) Fe N(5) C(29) . . . . 133.2(5) no

   N(3) C(13) C(6) C(1) . . . . 59.8(5) no

   N(3) C(13) C(6) C(8) . . . . -65.9(5) no

   N(3) C(13) C(14) C(15) . . . . -0.1(8) no

   N(3) C(17) C(16) C(15) . . . . 0.3(8) no

   N(4) Fe N(1) C(1) . . . . 126.4(3) no

   N(4) Fe N(1) C(5) . . . . -23.4(3) no

   N(4) Fe N(2) C(8) . . . . 55.1(7) no

   N(4) Fe N(2) C(12) . . . . -129.7(5) no

   N(4) Fe N(3) C(13) . . . . -126.2(4) no

   N(4) Fe N(3) C(17) . . . . 57.3(4) no

   N(4) Fe N(5) C(25) . . . . 39.8(3) no

   N(4) Fe N(5) C(29) . . . . -129.1(3) no

   N(4) C(20) C(18) C(5) . . . . -58.0(5) no

   N(4) C(20) C(18) C(25) . . . . 68.3(4) no

   N(4) C(20) C(21) C(22) . . . . 0.1(7) no

   N(4) C(24) C(23) C(22) . . . . 1.9(7) no

   N(5) Fe N(1) C(1) . . . . -152.1(3) no

   N(5) Fe N(1) C(5) . . . . 58.0(3) no

   N(5) Fe N(2) C(8) . . . . 123.4(3) no

   N(5) Fe N(2) C(12) . . . . -61.5(3) no

   N(5) Fe N(3) C(13) . . . . -31.2(7) no

   N(5) Fe N(3) C(17) . . . . 152.3(5) no

   N(5) Fe N(4) C(20) . . . . -40.0(3) no

   N(5) Fe N(4) C(24) . . . . 133.2(3) no

   N(5) C(25) C(18) C(5) . . . . 49.8(5) no

   N(5) C(25) C(18) C(20) . . . . -69.1(5) no

   N(5) C(25) C(26) C(27) . . . . -3.3(7) no

   N(5) C(29) C(28) C(27) . . . . -2.8(8) no

   C(1) N(1) C(5) C(4) . . . . -4.8(6) no

   C(1) N(1) C(5) C(18) . . . . -177.6(3) no

   C(1) C(2) C(3) C(4) . . . . -0.9(7) no

   C(1) C(6) O(1) C(7) . . . . -59.5(5) no

   C(1) C(6) C(8) C(9) . . . . 132.8(4) no

   C(1) C(6) C(13) C(14) . . . . -118.2(5) no

   C(2) C(1) N(1) C(5) . . . . 4.7(6) no

   C(2) C(1) C(6) C(8) . . . . -151.7(4) no

   C(2) C(1) C(6) C(13) . . . . 88.1(5) no

   C(2) C(3) C(4) C(5) . . . . 0.8(7) no

   C(3) C(2) C(1) C(6) . . . . -173.7(4) no

   C(3) C(4) C(5) C(18) . . . . 175.0(4) no

   C(4) C(5) C(18) C(20) . . . . -90.3(4) no

   C(4) C(5) C(18) C(25) . . . . 151.0(4) no

   C(5) N(1) C(1) C(6) . . . . 176.5(3) no

   C(5) C(18) O(2) C(19) . . . . 62.2(4) no

   C(5) C(18) C(20) C(21) . . . . 122.6(4) no

   C(5) C(18) C(25) C(26) . . . . -138.9(4) no

   C(6) C(8) N(2) C(12) . . . . -174.8(4) no

   C(6) C(8) C(9) C(10) . . . . 177.5(4) no

   C(6) C(13) N(3) C(17) . . . . -178.3(4) no

   C(6) C(13) C(14) C(15) . . . . 177.7(4) no

   C(7) O(1) C(6) C(8) . . . . 70.7(5) no

   C(7) O(1) C(6) C(13) . . . . -172.5(4) no

   C(8) N(2) C(12) C(11) . . . . -2.5(7) no

   C(8) C(6) C(13) C(14) . . . . 116.1(5) no

   C(8) C(9) C(10) C(11) . . . . -3.2(7) no

   C(9) C(8) N(2) C(12) . . . . -0.7(6) no

   C(9) C(8) C(6) C(13) . . . . -108.6(5) no

   C(9) C(10) C(11) C(12) . . . . 0.2(7) no

   C(13) N(3) C(17) C(16) . . . . 0.2(7) no

   C(13) C(14) C(15) C(16) . . . . 0.6(8) no

   C(14) C(13) N(3) C(17) . . . . -0.3(7) no

   C(14) C(15) C(16) C(17) . . . . -0.7(8) no

   C(18) C(20) N(4) C(24) . . . . -179.1(4) no

   C(18) C(20) C(21) C(22) . . . . 179.5(4) no

   C(18) C(25) N(5) C(29) . . . . 173.4(4) no

   C(18) C(25) C(26) C(27) . . . . -174.3(4) no

   C(19) O(2) C(18) C(20) . . . . 176.8(3) no

   C(19) O(2) C(18) C(25) . . . . -69.1(4) no

   C(20) N(4) C(24) C(23) . . . . -1.4(6) no

   C(20) C(18) C(25) C(26) . . . . 102.2(4) no

   C(20) C(21) C(22) C(23) . . . . 0.4(7) no

   C(21) C(20) N(4) C(24) . . . . 0.3(6) no

   C(21) C(20) C(18) C(25) . . . . -111.2(5) no

   C(21) C(22) C(23) C(24) . . . . -1.4(7) no

   C(25) N(5) C(29) C(28) . . . . 0.9(7) no

   C(25) C(26) C(27) C(28) . . . . 1.3(7) no

   C(26) C(25) N(5) C(29) . . . . 2.2(6) no

   C(26) C(27) C(28) C(29) . . . . 1.6(7) no

#------------------------------------------------------------------------------


#==============================================================================

# Additional structures and associated data_? identifiers

# should be added at this point if there is more than one

# structure analysis in the CIF.

#===END

data_General


#==============================================================================


_audit_creation_date                  '19100-09-01'

_audit_creation_method                'by teXsan for Windows v1.0'

_audit_update_record

;

?

;


#==============================================================================


# SUBMISSION DETAILS


_publ_requested_journal               ' ENTER JOURNAL NAME HERE'


_publ_requested_category            ' CHOOSE FI FM FO CI CM CO or AD'


_publ_contact_author_name           ' ENTER CONTACT NAME HERE'


_publ_contact_author_address

;

      ENTER ADDRESS

;

_publ_contact_letter

;

      ENTER TEXT OF LETTER

;


_publ_requested_coeditor_name          ?

_publ_contact_author_phone            ' ENTER PHONE NUMBER '

_publ_contact_author_fax              ' ENTER FAX NUMBER '

_publ_contact_author_email            ' ENTER EMAIL ADDRESS '


#==============================================================================


# PROCESSING SUMMARY (IUCr Office Use Only)


_journal_date_recd_electronic     ?

_journal_date_to_coeditor         ?

_journal_date_from_coeditor       ?

_journal_date_accepted            ?

_journal_date_printers_first      ?

_journal_date_printers_final      ?

_journal_date_proofs_out          ?

_journal_date_proofs_in           ?

_journal_coeditor_name            ?

_journal_coeditor_code            ?

_journal_coeditor_notes

; ?

;

_journal_techeditor_code          ?

_journal_techeditor_notes

; ?

;

_journal_coden_ASTM               ?

_journal_name_full                ?

_journal_year                     ?

_journal_volume                   ?

_journal_issue                    ?

_journal_page_first               ?

_journal_page_last                ?

_journal_suppl_publ_number        ?

_journal_suppl_publ_pages         ?


#==============================================================================


# TITLE AND AUTHOR LIST


_publ_section_title

;

      ENTER SECTION TITLE

;


_publ_section_title_footnote

;

      ENTER ANY FOOTNOTES TO TITLE

;

loop_

_publ_author_name

_publ_author_footnote

_publ_author_address

' FIRST AUTHORS NAME '

;

    FIRST AUTHORS FOOTNOTES

;

;

    FIRST AUTHORS ADDRESS

;


#==============================================================================


# TEXT


_publ_section_abstract

;

      ENTER ABSTRACT

;


_publ_section_exptl_refinement

;

      ENTER EXPERIMENTAL SECTION

;


_publ_section_comment

;

      ENTER TEXT

;


_publ_section_references

;

      ENTER OTHER REFERENCES


Molecular Structure Corporation. (1997-1998). teXsan for Windows version 1.03.

Single Crystal Structure Analysis Software. Version 1.04.

MSC, 3200 Research Forest Drive, The Woodlands, TX 77381, USA.


North, A.C.T., Phillips, D. C. & Mathews, F. S. (1968).

Acta Cryst. A24, 351-359.

;


_publ_section_acknowledgements

;

      ENTER ACKNOWLEDGEMENTS

;


_publ_section_table_legends

;

      ENTER TABLE LEGENDS

;


_publ_section_figure_captions

;

      ENTER FIGURE CAPTIONS

;


#==============================================================================


data__MF_Mn


#==============================================================================


_computing_data_collection            'MSC/AFC Diffractometer Control'

_computing_cell_refinement            'MSC/AFC Diffractometer Control'

_computing_data_reduction             'teXsan for Windows (MSC, 1997)'

_computing_structure_solution          ?

_computing_structure_refinement       'teXsan for Windows (MSC, 1997)'

_computing_publication_material       'teXsan for Windows (MSC, 1997)'

#------------------------------------------------------------------------------

_cell_length_a                         18.7470

_cell_length_b                         14.5550

_cell_length_c                         21.4540

_cell_angle_alpha                      90

_cell_angle_beta                       93

_cell_angle_gamma                      90

_cell_volume                           5840.18652(3)

_cell_formula_units_Z                  4

_cell_measurement_temperature          273.2

_cell_measurement_reflns_used          0

_cell_measurement_theta_min            0.0

_cell_measurement_theta_max            0.0

#------------------------------------------------------------------------------

_symmetry_cell_setting                 monoclinic

_symmetry_space_group_name_H-M        'P 21/n     '

_symmetry_Int_Tables_number            14

_symmetry_space_group_name_Hall        ?

loop_

_symmetry_equiv_pos_as_xyz

    '   +x,   +y,   +z'

    '1/2-x,1/2+y,1/2-z'

    '   -x,   -y,   -z'

    '1/2+x,1/2-y,1/2+z'

#------------------------------------------------------------------------------


_publ_section_exptl_prep

;

      ENTER EXPERIMENTAL SECTION

;

_exptl_crystal_description            'unknown'

_exptl_crystal_colour                 'unknown'

_exptl_crystal_size_max                0.00

_exptl_crystal_size_mid                0.00

_exptl_crystal_size_min                0.00

_exptl_crystal_density_diffrn          1.546

_exptl_crystal_density_meas            'not measured'

_chemical_formula_weight               1359.66

_chemical_formula_analytical           ?

_chemical_formula_sum                  'C59 H53 Cl6 N10 Mn3 O5 '

_chemical_formula_moiety               '?'

_chemical_formula_structural           ?

_chemical_compound_source              ?

_exptl_crystal_F_000                   2776.00

_exptl_absorpt_coefficient_mu          0.972

_exptl_absorpt_correction_type

;

\y scans (North,Phillips & Matthews, 1968)

;

_exptl_absorpt_correction_T_max        1.000

_exptl_absorpt_correction_T_min        0.862

_exptl_special_details

;

   ?

;


#==============================================================================


# EXPERIMENTAL DATA


_diffrn_special_details

;

   ?

;

_diffrn_ambient_temperature            273.2

_diffrn_radiation_wavelength           0.7107

_diffrn_radiation_type                 'Mo K\a'

_diffrn_radiation_source              'X-ray tube'

_diffrn_radiation_monochromator        graphite

_diffrn_radiation_detector            'scintillation counter'

_diffrn_measurement_device            'unknown'

_diffrn_measurement_method            ?


_diffrn_standards_number              0

_diffrn_standards_interval_count      0

_diffrn_standards_decay_%             -0.56

loop_

_diffrn_standard_refln_index_h

_diffrn_standard_refln_index_k

_diffrn_standard_refln_index_l

_diffrn_reflns_number                  11004

_reflns_number_total                   10701

_reflns_number_gt                      6049

_reflns_threshold_expression           I>3.00\s(I)

_diffrn_reflns_av_R_equivalents        0.03347

_diffrn_reflns_av_sigmaI/netI          ?

_diffrn_reflns_limit_h_min             -22

_diffrn_reflns_limit_h_max             22

_diffrn_reflns_limit_k_min             -17

_diffrn_reflns_limit_k_max             0

_diffrn_reflns_limit_l_min             0

_diffrn_reflns_limit_l_max             25

_diffrn_reflns_theta_min               0.00

_diffrn_reflns_theta_max               25.01

_diffrn_reflns_reduction_process      'Lp corrections applied'

_diffrn_orient_matrix_UB_11           -0.00902

_diffrn_orient_matrix_UB_12           -0.06239

_diffrn_orient_matrix_UB_13           -0.01835

_diffrn_orient_matrix_UB_21            0.04424

_diffrn_orient_matrix_UB_22           -0.02336

_diffrn_orient_matrix_UB_23            0.02339

_diffrn_orient_matrix_UB_31           -0.02859

_diffrn_orient_matrix_UB_32           -0.01670

_diffrn_orient_matrix_UB_33            0.03599

#------------------------------------------------------------------------------

loop_

_atom_type_symbol

_atom_type_oxidation_number

_atom_type_number_in_cell

_atom_type_scat_dispersion_real

_atom_type_scat_dispersion_imag

_atom_type_scat_source

    C  0   236 0.002 0.002

;International Tables for Crystallography

(1992, Vol. C, Table 6.1.1.2)

;

    N  0    40 0.004 0.003

;International Tables for Crystallography

(1992, Vol. C, Table 6.1.1.2)

;

    H  0   212 0.000 0.000

;International Tables for Crystallography

(1992, Vol. C, Table 6.1.1.2)

;

    O  0    20 0.008 0.006

;International Tables for Crystallography

(1992, Vol. C, Table 6.1.1.2)

;

    Cl 0    24 0.132 0.159

;International Tables for Crystallography

(1992, Vol. C, Tables 4.2.6.8 and 6.1.1.1)

;

    Mn 0    12 0.295 0.729

;International Tables for Crystallography

(1992, Vol. C, Tables 4.2.6.8 and 6.1.1.1)

;


#==============================================================================


# ATOMIC COORDINATES AND THERMAL PARAMETERS


loop_

_atom_site_label

_atom_site_fract_x

_atom_site_fract_y

_atom_site_fract_z

_atom_site_U_iso_or_equiv

_atom_site_occupancy

_atom_site_refinement_flags

_atom_site_adp_type

_atom_site_calc_flag

_atom_site_calc_attached_atom

Mn(1) 0.68299(5) 0.12818(6) 0.90644(4) 0.0164(3) 1.000   .  Uani d ?

Mn(2) 0.69750(5) 0.12217(7) 0.41414(4) 0.0176(3) 1.000   .  Uani d ?

Mn(3) 0.01126(6) 0.08158(8) 0.73572(5) 0.0366(3) 1.000   .  Uani d ?

Cl(1) 0.70250(9) 0.2297(1) 0.82344(7) 0.0294(5) 1.000   .  Uani d ?

Cl(2) 0.7349(1) 0.2129(1) 0.33151(7) 0.0344(5) 1.000   .  Uani d ?

Cl(3) 0.0785(1) 0.0511(2) 0.8316(1) 0.0722(8) 1.000   .  Uani d ?

Cl(4) 0.0222(2) -0.0412(2) 0.6650(1) 0.086(1) 1.000   .  Uani d ?

Cl(5) -0.1092(1) 0.1046(1) 0.7582(1) 0.0522(7) 1.000   .  Uani d ?

Cl(6) 0.0503(1) 0.2175(1) 0.68988(9) 0.0515(7) 1.000   .  Uani d ?

O(1) 0.7585(2) 0.1436(3) 1.1195(2) 0.022(1) 1.000   .  Uani d ?

O(2) 0.5468(2) -0.1412(3) 0.9117(2) 0.020(1) 1.000   .  Uani d ?

O(3) 0.7510(2) 0.1440(3) 0.6312(2) 0.023(1) 1.000   .  Uani d ?

O(4) 0.5508(2) -0.1394(3) 0.4168(2) 0.022(1) 1.000   .  Uani d ?

O(5) 0.0346(5) 0.1662(7) 0.1849(6) 0.250(6) 1.000   .  Uani d ?

N(1) 0.6582(2) 0.0376(3) 0.9874(2) 0.015(1) 1.000   .  Uani d ?

N(2) 0.6682(2) 0.2370(3) 0.9765(2) 0.016(1) 1.000   .  Uani d ?

N(3) 0.7957(3) 0.1327(3) 0.9576(2) 0.020(1) 1.000   .  Uani d ?

N(4) 0.6898(2) -0.0089(3) 0.8540(2) 0.018(1) 1.000   .  Uani d ?

N(5) 0.5642(3) 0.1055(3) 0.8847(2) 0.021(2) 1.000   .  Uani d ?

N(6) 0.6617(2) 0.0364(3) 0.4949(2) 0.015(1) 1.000   .  Uani d ?

N(7) 0.6734(2) 0.2315(3) 0.4820(2) 0.019(2) 1.000   .  Uani d ?

N(8) 0.8044(2) 0.1292(3) 0.4744(2) 0.019(1) 1.000   .  Uani d ?

N(9) 0.7012(2) -0.0161(3) 0.3624(2) 0.019(2) 1.000   .  Uani d ?

N(10) 0.5820(3) 0.1040(3) 0.3823(2) 0.021(2) 1.000   .  Uani d ?

C(1) 0.7009(3) 0.0457(4) 1.0398(3) 0.015(2) 1.000   .  Uani d ?

C(2) 0.7201(3) -0.0289(4) 1.0775(3) 0.021(2) 1.000   .  Uani d ?

C(3) 0.6916(3) -0.1148(4) 1.0606(3) 0.021(2) 1.000   .  Uani d ?

C(4) 0.6465(3) -0.1224(4) 1.0086(3) 0.021(2) 1.000   .  Uani d ?

C(5) 0.6307(3) -0.0458(4) 0.9716(3) 0.013(2) 1.000   .  Uani d ?

C(6) 0.7362(3) 0.1389(4) 1.0554(3) 0.017(2) 1.000   .  Uani d ?

C(7) 0.7062(3) 0.1290(5) 1.1645(3) 0.031(2) 1.000   .  Uani d ?

C(8) 0.6924(3) 0.2266(4) 1.0363(3) 0.017(2) 1.000   .  Uani d ?

C(9) 0.6831(3) 0.2956(5) 1.0795(3) 0.025(2) 1.000   .  Uani d ?

C(10) 0.6471(3) 0.3749(5) 1.0610(3) 0.030(2) 1.000   .  Uani d ?

C(11) 0.6236(3) 0.3857(4) 0.9994(3) 0.023(2) 1.000   .  Uani d ?

C(12) 0.6363(3) 0.3160(4) 0.9591(3) 0.022(2) 1.000   .  Uani d ?

C(13) 0.8049(3) 0.1380(4) 1.0202(3) 0.016(2) 1.000   .  Uani d ?

C(14) 0.8718(3) 0.1385(4) 1.0513(3) 0.023(2) 1.000   .  Uani d ?

C(15) 0.9319(3) 0.1338(5) 1.0163(3) 0.032(2) 1.000   .  Uani d ?

C(16) 0.9230(3) 0.1299(5) 0.9521(3) 0.030(2) 1.000   .  Uani d ?

C(17) 0.8543(3) 0.1308(4) 0.9246(3) 0.026(2) 1.000   .  Uani d ?

C(18) 0.5871(3) -0.0586(4) 0.9091(3) 0.016(2) 1.000   .  Uani d ?

C(19) 0.4918(3) -0.1411(4) 0.9551(3) 0.028(2) 1.000   .  Uani d ?

C(20) 0.6416(3) -0.0772(4) 0.8599(3) 0.016(2) 1.000   .  Uani d ?

C(21) 0.6400(3) -0.1552(4) 0.8233(3) 0.019(2) 1.000   .  Uani d ?

C(22) 0.6900(3) -0.1649(4) 0.7793(3) 0.021(2) 1.000   .  Uani d ?

C(23) 0.7394(3) -0.0962(5) 0.7730(3) 0.022(2) 1.000   .  Uani d ?

C(24) 0.7375(3) -0.0190(4) 0.8106(3) 0.019(2) 1.000   .  Uani d ?

C(25) 0.5395(3) 0.0188(4) 0.8820(3) 0.018(2) 1.000   .  Uani d ?

C(26) 0.4767(3) -0.0037(5) 0.8483(3) 0.034(2) 1.000   .  Uani d ?

C(27) 0.4353(4) 0.0652(6) 0.8202(4) 0.049(3) 1.000   .  Uani d ?

C(28) 0.4589(4) 0.1552(5) 0.8261(4) 0.042(2) 1.000   .  Uani d ?

C(29) 0.5232(4) 0.1713(5) 0.8572(3) 0.031(2) 1.000   .  Uani d ?

C(30) 0.7016(3) 0.0445(4) 0.5492(3) 0.016(2) 1.000   .  Uani d ?

C(31) 0.7201(3) -0.0300(4) 0.5866(3) 0.021(2) 1.000   .  Uani d ?

C(32) 0.6951(3) -0.1165(4) 0.5687(3) 0.024(2) 1.000   .  Uani d ?

C(33) 0.6530(3) -0.1247(4) 0.5146(3) 0.022(2) 1.000   .  Uani d ?

C(34) 0.6365(3) -0.0475(4) 0.4782(3) 0.015(2) 1.000   .  Uani d ?

C(35) 0.7353(3) 0.1385(4) 0.5658(3) 0.016(2) 1.000   .  Uani d ?

C(36) 0.6925(4) 0.1322(5) 0.6700(3) 0.031(2) 1.000   .  Uani d ?

C(37) 0.6946(3) 0.2257(4) 0.5428(3) 0.018(2) 1.000   .  Uani d ?

C(38) 0.6865(3) 0.2986(5) 0.5835(3) 0.025(2) 1.000   .  Uani d ?

C(39) 0.6530(3) 0.3775(5) 0.5620(3) 0.032(2) 1.000   .  Uani d ?

C(40) 0.6306(3) 0.3842(5) 0.5000(3) 0.031(2) 1.000   .  Uani d ?

C(41) 0.6430(3) 0.3111(5) 0.4612(3) 0.026(2) 1.000   .  Uani d ?

C(42) 0.8085(3) 0.1363(4) 0.5370(3) 0.016(2) 1.000   .  Uani d ?

C(43) 0.8723(3) 0.1403(4) 0.5727(3) 0.022(2) 1.000   .  Uani d ?

C(44) 0.9354(3) 0.1361(4) 0.5434(3) 0.027(2) 1.000   .  Uani d ?

C(45) 0.9326(3) 0.1309(4) 0.4787(3) 0.026(2) 1.000   .  Uani d ?

C(46) 0.8668(3) 0.1269(4) 0.4459(3) 0.022(2) 1.000   .  Uani d ?

C(47) 0.5952(3) -0.0590(4) 0.4149(3) 0.018(2) 1.000   .  Uani d ?

C(48) 0.4984(3) -0.1379(5) 0.4624(3) 0.033(2) 1.000   .  Uani d ?

C(49) 0.6497(3) -0.0806(4) 0.3673(3) 0.019(2) 1.000   .  Uani d ?

C(50) 0.6451(3) -0.1582(4) 0.3299(3) 0.020(2) 1.000   .  Uani d ?

C(51) 0.6950(4) -0.1688(5) 0.2855(3) 0.028(2) 1.000   .  Uani d ?

C(52) 0.7470(3) -0.1045(5) 0.2793(3) 0.029(2) 1.000   .  Uani d ?

C(53) 0.7484(3) -0.0285(5) 0.3188(3) 0.025(2) 1.000   .  Uani d ?

C(54) 0.5501(3) 0.0213(4) 0.3863(3) 0.020(2) 1.000   .  Uani d ?

C(55) 0.4832(3) 0.0055(5) 0.3576(3) 0.034(2) 1.000   .  Uani d ?

C(56) 0.4468(3) 0.0756(6) 0.3272(4) 0.047(3) 1.000   .  Uani d ?

C(57) 0.4785(4) 0.1607(5) 0.3235(3) 0.039(2) 1.000   .  Uani d ?

C(58) 0.5462(4) 0.1695(5) 0.3503(3) 0.033(2) 1.000   .  Uani d ?

C(59) -0.0258(8) 0.174(1) 0.2010(7) 0.146(5) 1.000   .  Uiso d ?

H(1) 0.7517 -0.0219 1.1137 0.025 1.000   .  Uiso c ?

H(2) 0.7037 -0.1674 1.0853 0.026 1.000   .  Uiso c ?

H(3) 0.6257 -0.1802 0.9975 0.024 1.000   .  Uiso c ?

H(4) 0.6695 0.1740 1.1588 0.037 1.000   .  Uiso c ?

H(5) 0.6860 0.0695 1.1589 0.037 1.000   .  Uiso c ?

H(6) 0.7285 0.1341 1.2055 0.037 1.000   .  Uiso c ?

H(7) 0.7013 0.2883 1.1217 0.030 1.000   .  Uiso c ?

H(8) 0.6387 0.4215 1.0906 0.035 1.000   .  Uiso c ?

H(9) 0.5994 0.4399 0.9852 0.029 1.000   .  Uiso c ?

H(10) 0.6216 0.3239 0.9162 0.027 1.000   .  Uiso c ?

H(11) 0.8770 0.1419 1.0956 0.028 1.000   .  Uiso c ?

H(12) 0.9785 0.1333 1.0366 0.038 1.000   .  Uiso c ?

H(13) 0.9630 0.1266 0.9274 0.037 1.000   .  Uiso c ?

H(14) 0.8480 0.1298 0.8803 0.032 1.000   .  Uiso c ?

H(15) 0.5126 -0.1304 0.9962 0.034 1.000   .  Uiso c ?

H(16) 0.4582 -0.0939 0.9442 0.034 1.000   .  Uiso c ?

H(17) 0.4682 -0.1989 0.9538 0.034 1.000   .  Uiso c ?

H(18) 0.6050 -0.2014 0.8282 0.022 1.000   .  Uiso c ?

H(19) 0.6902 -0.2183 0.7539 0.026 1.000   .  Uiso c ?

H(20) 0.7744 -0.1016 0.7432 0.027 1.000   .  Uiso c ?

H(21) 0.7712 0.0286 0.8054 0.023 1.000   .  Uiso c ?

H(22) 0.4621 -0.0661 0.8445 0.041 1.000   .  Uiso c ?

H(23) 0.3915 0.0510 0.7972 0.059 1.000   .  Uiso c ?

H(24) 0.4307 0.2044 0.8088 0.051 1.000   .  Uiso c ?

H(25) 0.5402 0.2328 0.8595 0.036 1.000   .  Uiso c ?

H(26) 0.7496 -0.0223 0.6240 0.026 1.000   .  Uiso c ?

H(27) 0.7070 -0.1689 0.5936 0.030 1.000   .  Uiso c ?

H(28) 0.6351 -0.1832 0.5016 0.027 1.000   .  Uiso c ?

H(29) 0.7092 0.1378 0.7126 0.037 1.000   .  Uiso c ?

H(30) 0.6573 0.1779 0.6601 0.037 1.000   .  Uiso c ?

H(31) 0.6720 0.0731 0.6629 0.037 1.000   .  Uiso c ?

H(32) 0.7041 0.2940 0.6259 0.031 1.000   .  Uiso c ?

H(33) 0.6453 0.4269 0.5897 0.038 1.000   .  Uiso c ?

H(34) 0.6071 0.4380 0.4841 0.037 1.000   .  Uiso c ?

H(35) 0.6296 0.3169 0.4179 0.031 1.000   .  Uiso c ?

H(36) 0.8728 0.1460 0.6169 0.027 1.000   .  Uiso c ?

H(37) 0.9800 0.1367 0.5671 0.033 1.000   .  Uiso c ?

H(38) 0.9753 0.1302 0.4573 0.031 1.000   .  Uiso c ?

H(39) 0.8651 0.1222 0.4017 0.027 1.000   .  Uiso c ?

H(40) 0.5218 -0.1321 0.5030 0.040 1.000   .  Uiso c ?

H(41) 0.4672 -0.0872 0.4545 0.040 1.000   .  Uiso c ?

H(42) 0.4717 -0.1934 0.4600 0.040 1.000   .  Uiso c ?

H(43) 0.6090 -0.2030 0.3345 0.025 1.000   .  Uiso c ?

H(44) 0.6928 -0.2212 0.2591 0.034 1.000   .  Uiso c ?

H(45) 0.7812 -0.1114 0.2490 0.036 1.000   .  Uiso c ?

H(46) 0.7843 0.0166 0.3147 0.030 1.000   .  Uiso c ?

H(47) 0.4624 -0.0539 0.3591 0.040 1.000   .  Uiso c ?

H(48) 0.4000 0.0655 0.3086 0.058 1.000   .  Uiso c ?

H(49) 0.4543 0.2110 0.3033 0.048 1.000   .  Uiso c ?

H(50) 0.5697 0.2267 0.3458 0.041 1.000   .  Uiso c ?

H(51) -0.0268 0.2153 0.2354 0.176 1.000   .  Uiso c ?

H(52) -0.0566 0.1966 0.1673 0.176 1.000   .  Uiso c ?

H(53) -0.0431 0.1154 0.2135 0.176 1.000   .  Uiso c ?


loop_

_atom_site_aniso_label

_atom_site_aniso_U_11

_atom_site_aniso_U_22

_atom_site_aniso_U_33

_atom_site_aniso_U_12

_atom_site_aniso_U_13

_atom_site_aniso_U_23

   Mn(1)  0.0210(5)   0.0124(5)   0.0160(5)   -0.0012(4)  0.0035(4)   -0.0004(5)

   Mn(2)  0.0211(5)   0.0158(5)   0.0158(5)   -0.0021(5)  0.0007(4)   0.0009(5)

   Mn(3)  0.0407(7)   0.0364(7)   0.0337(7)   0.0044(6)   0.0086(5)   0.0026(6)

   Cl(1)  0.047(1)    0.023(1)    0.0194(9)   -0.0067(8)  0.0086(8)   0.0034(8)

   Cl(2)  0.052(1)    0.031(1)    0.0207(9)   -0.0126(9)  0.0066(8)   0.0053(8)

   Cl(3)  0.098(2)    0.054(2)    0.060(2)    -0.007(1)   -0.034(1)   0.012(1)

   Cl(4)  0.140(2)    0.056(2)    0.068(2)    0.008(2)    0.047(2)    -0.021(1)

   Cl(5)  0.041(1)    0.057(2)    0.061(1)    -0.001(1)   0.023(1)    0.007(1)

   Cl(6)  0.053(1)    0.048(1)    0.055(1)    -0.002(1)   0.017(1)    0.014(1)

   O(1)   0.023(2)    0.022(3)    0.019(2)    -0.004(2)   -0.001(2)   -0.004(2)

   O(2)   0.021(2)    0.015(3)    0.025(3)    -0.009(2)   0.005(2)    -0.005(2)

   O(3)   0.028(3)    0.025(3)    0.015(2)    0.001(2)    -0.002(2)   -0.002(2)

   O(4)   0.023(2)    0.017(3)    0.028(3)    -0.006(2)   0.003(2)    -0.004(2)

   O(5)   0.18(1)     0.18(1)     0.42(2)     0.081(8)    0.22(1)     0.19(1)

   N(1)   0.015(3)    0.012(3)    0.018(3)    -0.003(2)   0.005(2)    -0.005(2)

   N(2)   0.016(3)    0.011(3)    0.020(3)    -0.003(2)   0.002(2)    0.001(2)

   N(3)   0.024(3)    0.013(3)    0.023(3)    -0.002(3)   0.007(2)    -0.003(3)

   N(4)   0.021(3)    0.014(3)    0.019(3)    -0.002(2)   0.003(2)    -0.003(2)

   N(5)   0.021(3)    0.020(3)    0.022(3)    0.003(2)    -0.002(2)   0.002(3)

   N(6)   0.016(3)    0.013(3)    0.016(3)    -0.001(2)   0.003(2)    -0.003(2)

   N(7)   0.021(3)    0.018(3)    0.018(3)    -0.001(3)   -0.000(2)   0.002(3)

   N(8)   0.020(3)    0.015(3)    0.022(3)    -0.002(3)   0.003(2)    -0.005(3)

   N(9)   0.019(3)    0.020(3)    0.018(3)    0.000(2)    0.002(2)    0.000(3)

   N(10)  0.026(3)    0.013(3)    0.025(3)    0.003(2)    -0.001(2)   0.003(3)

   C(1)   0.017(3)    0.010(3)    0.017(3)    -0.000(3)   0.002(3)    -0.001(3)

   C(2)   0.021(4)    0.026(4)    0.015(3)    0.003(3)    0.001(3)    -0.001(3)

   C(3)   0.030(4)    0.012(4)    0.022(4)    0.004(3)    -0.002(3)   0.002(3)

   C(4)   0.028(4)    0.011(4)    0.024(4)    -0.002(3)   0.005(3)    0.004(3)

   C(5)   0.012(3)    0.013(4)    0.014(3)    0.002(3)    0.006(3)    -0.001(3)

   C(6)   0.020(3)    0.018(4)    0.013(3)    -0.003(3)   -0.002(3)   -0.005(3)

   C(7)   0.042(4)    0.032(4)    0.019(4)    -0.004(4)   0.003(3)    -0.003(3)

   C(8)   0.010(3)    0.017(4)    0.025(4)    -0.001(3)   0.007(3)    -0.001(3)

   C(9)   0.028(4)    0.028(4)    0.019(4)    0.002(3)    -0.004(3)   -0.007(3)

   C(10)  0.028(4)    0.022(4)    0.040(5)    0.002(4)    0.002(3)    -0.012(4)

   C(11)  0.021(4)    0.013(4)    0.035(4)    0.003(3)    0.000(3)    -0.002(3)

   C(12)  0.024(4)    0.019(4)    0.022(4)    -0.001(3)   -0.003(3)   0.003(3)

   C(13)  0.020(3)    0.003(3)    0.025(4)    -0.000(3)   0.000(3)    -0.001(3)

   C(14)  0.023(4)    0.016(4)    0.030(4)    0.003(3)    -0.001(3)   0.003(3)

   C(15)  0.014(4)    0.023(4)    0.059(5)    -0.001(3)   -0.004(3)   0.005(4)

   C(16)  0.023(4)    0.021(4)    0.049(5)    -0.001(3)   0.009(3)    -0.001(4)

   C(17)  0.036(4)    0.017(4)    0.028(4)    -0.004(3)   0.014(3)    -0.000(3)

   C(18)  0.014(3)    0.014(4)    0.019(3)    -0.008(3)   0.001(3)    -0.003(3)

   C(19)  0.028(4)    0.025(4)    0.033(4)    -0.006(3)   0.008(3)    0.004(3)

   C(20)  0.016(3)    0.019(4)    0.013(3)    0.002(3)    0.001(3)    0.000(3)

   C(21)  0.020(4)    0.014(4)    0.021(4)    0.001(3)    -0.006(3)   0.001(3)

   C(22)  0.028(4)    0.020(4)    0.015(4)    0.005(3)    0.000(3)    -0.004(3)

   C(23)  0.024(4)    0.029(4)    0.014(3)    0.008(3)    0.003(3)    0.002(3)

   C(24)  0.017(4)    0.021(4)    0.019(4)    -0.001(3)   0.004(3)    0.002(3)

   C(25)  0.019(4)    0.017(4)    0.019(4)    -0.001(3)   0.002(3)    -0.000(3)

   C(26)  0.026(4)    0.030(5)    0.046(5)    -0.009(3)   -0.010(3)   0.014(4)

   C(27)  0.023(4)    0.061(6)    0.061(6)    -0.013(4)   -0.017(4)   0.022(5)

   C(28)  0.026(4)    0.041(5)    0.057(5)    0.006(4)    -0.007(4)   0.024(4)

   C(29)  0.031(4)    0.024(4)    0.036(4)    -0.002(3)   -0.003(3)   0.004(4)

   C(30)  0.010(3)    0.019(4)    0.018(4)    0.001(3)    0.004(3)    0.002(3)

   C(31)  0.022(4)    0.024(4)    0.018(4)    -0.001(3)   -0.002(3)   0.002(3)

   C(32)  0.028(4)    0.017(4)    0.027(4)    0.005(3)    -0.000(3)   0.004(3)

   C(33)  0.028(4)    0.013(4)    0.025(4)    0.003(3)    0.007(3)    0.001(3)

   C(34)  0.017(3)    0.011(4)    0.016(3)    -0.001(3)   0.006(3)    -0.003(3)

   C(35)  0.018(3)    0.016(4)    0.014(3)    -0.003(3)   -0.001(3)   -0.005(3)

   C(36)  0.047(4)    0.030(4)    0.017(4)    -0.003(4)   0.007(3)    -0.007(3)

   C(37)  0.016(3)    0.011(4)    0.027(4)    -0.003(3)   0.002(3)    -0.002(3)

   C(38)  0.028(4)    0.026(4)    0.021(4)    0.002(3)    -0.003(3)   -0.007(3)

   C(39)  0.036(4)    0.020(4)    0.039(5)    0.002(4)    -0.000(3)   -0.013(4)

   C(40)  0.029(4)    0.020(4)    0.044(5)    0.003(3)    0.006(4)    0.002(4)

   C(41)  0.025(4)    0.020(4)    0.033(4)    0.001(3)    -0.001(3)   0.007(3)

   C(42)  0.022(3)    0.009(4)    0.017(3)    -0.003(3)   -0.002(3)   0.002(3)

   C(43)  0.029(4)    0.014(4)    0.024(4)    -0.003(3)   0.000(3)    -0.002(3)

   C(44)  0.020(4)    0.018(4)    0.043(4)    -0.002(3)   -0.003(3)   -0.000(4)

   C(45)  0.019(4)    0.022(4)    0.038(4)    0.004(3)    0.004(3)    0.003(4)

   C(46)  0.027(4)    0.016(4)    0.024(4)    0.003(3)    0.006(3)    -0.001(3)

   C(47)  0.018(3)    0.012(4)    0.025(4)    -0.004(3)   0.001(3)    0.002(3)

   C(48)  0.027(4)    0.029(5)    0.043(5)    -0.003(3)   0.008(3)    0.001(4)

   C(49)  0.020(4)    0.017(4)    0.019(4)    0.003(3)    -0.002(3)   0.000(3)

   C(50)  0.028(4)    0.017(4)    0.016(4)    0.003(3)    -0.001(3)   -0.005(3)

   C(51)  0.036(4)    0.025(4)    0.021(4)    0.012(4)    -0.008(3)   -0.007(3)

   C(52)  0.031(4)    0.035(5)    0.023(4)    0.015(4)    0.006(3)    -0.002(3)

   C(53)  0.023(4)    0.028(4)    0.025(4)    0.002(3)    0.006(3)    0.007(3)

   C(54)  0.023(4)    0.021(4)    0.016(3)    0.007(3)    0.006(3)    0.001(3)

   C(55)  0.025(4)    0.033(5)    0.040(4)    -0.007(4)   -0.013(3)   0.014(4)

   C(56)  0.017(4)    0.056(6)    0.066(6)    -0.011(4)   -0.018(4)   0.024(5)

   C(57)  0.029(4)    0.035(5)    0.052(5)    0.007(4)    -0.008(4)   0.015(4)

   C(58)  0.035(4)    0.020(4)    0.042(5)    -0.004(3)   -0.005(4)   0.006(4)


#==============================================================================


# REFINEMENT DATA


_refine_special_details

;

   ?

;

_refine_ls_structure_factor_coef       F

_refine_ls_matrix_type                 full

_refine_ls_weighting_scheme            sigma

_refine_ls_weighting_details           'w = 1/[\s^2^(Fo) + 0.00006|Fo|^2^]'

_refine_ls_hydrogen_treatment          noref

_refine_ls_extinction_method           none

_refine_ls_extinction_coef             ?

_refine_ls_abs_structure_details       ?

_refine_ls_abs_structure_Flack         ?

_refine_ls_number_reflns               6049

_refine_ls_number_parameters           743

_refine_ls_number_restraints           0

_refine_ls_number_constraints          0

_refine_ls_R_factor_all                ?

_refine_ls_R_factor_gt                 0.0540

_refine_ls_wR_factor_all               ?

_refine_ls_wR_factor_ref               0.0570

_refine_ls_goodness_of_fit_all         ?

_refine_ls_goodness_of_fit_ref         2.220

_refine_ls_shift/su_max                0.2000

_refine_ls_shift/su_mean               0.0000

_refine_diff_density_min               -1.06

_refine_diff_density_max               0.96


#==============================================================================


# MOLECULAR GEOMETRY


_geom_special_details

;

   ?

;

loop_

_geom_bond_atom_site_label_1

_geom_bond_atom_site_label_2

_geom_bond_distance

_geom_bond_site_symmetry_1

_geom_bond_site_symmetry_2

_geom_bond_publ_flag

         ?  ?    ?      ? ?  ?

# -- ENTER BONDS HERE, ONE PER LINE --

# e.g. C1 C2 1.541(1) . . yes

#------------------------------------------------------------------------------

loop_

_geom_angle_atom_site_label_1

_geom_angle_atom_site_label_2

_geom_angle_atom_site_label_3

_geom_angle

_geom_angle_site_symmetry_1

_geom_angle_site_symmetry_2

_geom_angle_site_symmetry_3

_geom_angle_publ_flag

# -- ENTER ANGLES HERE, ONE PER LINE --

# e.g. C1 C2 C3 109.4(3) . . . yes

         ?  ?  ?     ?     ? ? ?  ?

#------------------------------------------------------------------------------

loop_

_geom_contact_atom_site_label_1

_geom_contact_atom_site_label_2

_geom_contact_distance

_geom_contact_site_symmetry_1

_geom_contact_site_symmetry_2

_geom_contact_publ_flag

#------------------------------------------------------------------------------

loop_

_geom_torsion_atom_site_label_1

_geom_torsion_atom_site_label_2

_geom_torsion_atom_site_label_3

_geom_torsion_atom_site_label_4

_geom_torsion_site_symmetry_1

_geom_torsion_site_symmetry_2

_geom_torsion_site_symmetry_3

_geom_torsion_site_symmetry_4

_geom_torsion

_geom_torsion_publ_flag

         ?  ?  ?  ?   ?   ? ? ? ?  ?

# -- ENTER TORSION ANGLES HERE, ONE PER LINE --

# e.g. C1 C2 C3 C4 52.8(1) . . . . yes

#------------------------------------------------------------------------------


#==============================================================================

# Additional structures and associated data_? identifiers

# should be added at this point if there is more than one

# structure analysis in the CIF.

#===END

data_General


#==============================================================================


_audit_creation_date                  '19100-09-14'

_audit_creation_method                'by teXsan for Windows v1.0'

_audit_update_record

;

?

;


#==============================================================================


# SUBMISSION DETAILS


_publ_requested_journal               ' ENTER JOURNAL NAME HERE'


_publ_requested_category            ' CHOOSE FI FM FO CI CM CO or AD'


_publ_contact_author_name           ' ENTER CONTACT NAME HERE'


_publ_contact_author_address

;

      ENTER ADDRESS

;

_publ_contact_letter

;

      ENTER TEXT OF LETTER

;


_publ_requested_coeditor_name          ?

_publ_contact_author_phone            ' ENTER PHONE NUMBER '

_publ_contact_author_fax              ' ENTER FAX NUMBER '

_publ_contact_author_email            ' ENTER EMAIL ADDRESS '


#==============================================================================


# PROCESSING SUMMARY (IUCr Office Use Only)


_journal_date_recd_electronic     ?

_journal_date_to_coeditor         ?

_journal_date_from_coeditor       ?

_journal_date_accepted            ?

_journal_date_printers_first      ?

_journal_date_printers_final      ?

_journal_date_proofs_out          ?

_journal_date_proofs_in           ?

_journal_coeditor_name            ?

_journal_coeditor_code            ?

_journal_coeditor_notes

; ?

;

_journal_techeditor_code          ?

_journal_techeditor_notes

; ?

;

_journal_coden_ASTM               ?

_journal_name_full                ?

_journal_year                     ?

_journal_volume                   ?

_journal_issue                    ?

_journal_page_first               ?

_journal_page_last                ?

_journal_suppl_publ_number        ?

_journal_suppl_publ_pages         ?


#==============================================================================


# TITLE AND AUTHOR LIST


_publ_section_title

;

      ENTER SECTION TITLE

;


_publ_section_title_footnote

;

      ENTER ANY FOOTNOTES TO TITLE

;

loop_

_publ_author_name

_publ_author_footnote

_publ_author_address

' FIRST AUTHORS NAME '

;

    FIRST AUTHORS FOOTNOTES

;

;

    FIRST AUTHORS ADDRESS

;


#==============================================================================


# TEXT


_publ_section_abstract

;

      ENTER ABSTRACT

;


_publ_section_exptl_refinement

;

      ENTER EXPERIMENTAL SECTION

;


_publ_section_comment

;

      ENTER TEXT

;


_publ_section_references

;

      ENTER OTHER REFERENCES


Molecular Structure Corporation. (1997-1998). teXsan for Windows version 1.03.

Single Crystal Structure Analysis Software. Version 1.04.

MSC, 3200 Research Forest Drive, The Woodlands, TX 77381, USA.


North, A.C.T., Phillips, D. C. & Mathews, F. S. (1968).

Acta Cryst. A24, 351-359.


Altomare, A., Cascarano, M.,

Giacovazzo, C., Guagliardi, A. (1993).

J. Appl. Cryst., 26, 343.

;


_publ_section_acknowledgements

;

      ENTER ACKNOWLEDGEMENTS

;


_publ_section_table_legends

;

      ENTER TABLE LEGENDS

;


_publ_section_figure_captions

;

      ENTER FIGURE CAPTIONS

;


#==============================================================================


data__RTJII155A________________


#==============================================================================


_computing_data_collection            'MSC/AFC Diffractometer Control'

_computing_cell_refinement            'MSC/AFC Diffractometer Control'

_computing_data_reduction             'teXsan for Windows (MSC, 1997)'

_computing_structure_solution

;

SIR92 (Altomare, et. al. 1993)

;

_computing_structure_refinement       'teXsan for Windows (MSC, 1997)'

_computing_publication_material       'teXsan for Windows (MSC, 1997)'

#------------------------------------------------------------------------------

_cell_length_a                         12.7470

_cell_length_b                         14.3890

_cell_length_c                         16.4160

_cell_angle_alpha                      89

_cell_angle_beta                       79

_cell_angle_gamma                      89

_cell_volume                           2957.31(0)

_cell_formula_units_Z                  4

_cell_measurement_temperature          296.2

_cell_measurement_reflns_used          0

_cell_measurement_theta_min            0.0

_cell_measurement_theta_max            0.0

#------------------------------------------------------------------------------

_symmetry_cell_setting                 monoclinic

_symmetry_space_group_name_H-M        'P 21/n     '

_symmetry_Int_Tables_number            14

_symmetry_space_group_name_Hall        ?

loop_

_symmetry_equiv_pos_as_xyz

    '   +x,   +y,   +z'

    '1/2-x,1/2+y,1/2-z'

    '   -x,   -y,   -z'

    '1/2+x,1/2-y,1/2+z'

#------------------------------------------------------------------------------


_publ_section_exptl_prep

;

      ENTER EXPERIMENTAL SECTION

;

_exptl_crystal_description            'NONE'

_exptl_crystal_colour                 'NONE'

_exptl_crystal_size_max                0.00

_exptl_crystal_size_mid                0.00

_exptl_crystal_size_min                0.00

_exptl_crystal_density_diffrn          1.492

_exptl_crystal_density_meas            'not measured'

_chemical_formula_weight               664.20

_chemical_formula_analytical           ?

_chemical_formula_sum                  'C31 H28 Cl2 N5 O4 Ni '

_chemical_formula_moiety               '?'

_chemical_formula_structural           ?

_chemical_compound_source              ?

_exptl_crystal_F_000                   1372.00

_exptl_absorpt_coefficient_mu          0.883

_exptl_absorpt_correction_type

;

\y scans (North,Phillips & Matthews, 1968)

;

_exptl_absorpt_correction_T_max        1.000

_exptl_absorpt_correction_T_min        0.889

_exptl_special_details

;

   ?

;


#==============================================================================


# EXPERIMENTAL DATA


_diffrn_special_details

;

   ?

;

_diffrn_ambient_temperature            296.2

_diffrn_radiation_wavelength           0.7107

_diffrn_radiation_type                 'Mo K\a'

_diffrn_radiation_source              'X-ray tube'

_diffrn_radiation_monochromator        graphite

_diffrn_radiation_detector            'scintillation counter'

_diffrn_measurement_device            'CAD4'

_diffrn_measurement_method            \w-2\q


_diffrn_standards_number              3

_diffrn_standards_interval_count      0

_diffrn_standards_decay_%             -3.93

loop_

_diffrn_standard_refln_index_h

_diffrn_standard_refln_index_k

_diffrn_standard_refln_index_l

     ? ? ?    ? ? ?    ? ? ?


_diffrn_reflns_number                  10810

_reflns_number_total                   5413

_reflns_number_gt                      5180

_reflns_threshold_expression           I>0.00\s(I)

_diffrn_reflns_av_R_equivalents        0.07418

_diffrn_reflns_av_sigmaI/netI          0.126

_diffrn_reflns_limit_h_min             -15

_diffrn_reflns_limit_h_max             15

_diffrn_reflns_limit_k_min             -17

_diffrn_reflns_limit_k_max             0

_diffrn_reflns_limit_l_min             -19

_diffrn_reflns_limit_l_max             19

_diffrn_reflns_theta_min               2.89

_diffrn_reflns_theta_max               24.98

_diffrn_reflns_reduction_process      'Lp corrections applied'

_diffrn_orient_matrix_UB_11           -0.00336

_diffrn_orient_matrix_UB_12            0.03525

_diffrn_orient_matrix_UB_13           -0.05192

_diffrn_orient_matrix_UB_21            0.07670

_diffrn_orient_matrix_UB_22            0.01797

_diffrn_orient_matrix_UB_23           -0.00499

_diffrn_orient_matrix_UB_31            0.02209

_diffrn_orient_matrix_UB_32           -0.05721

_diffrn_orient_matrix_UB_33           -0.03346

#------------------------------------------------------------------------------

loop_

_atom_type_symbol

_atom_type_oxidation_number

_atom_type_number_in_cell

_atom_type_scat_dispersion_real

_atom_type_scat_dispersion_imag

_atom_type_scat_source

    C  0   124 0.002 0.002

;International Tables for Crystallography

(1992, Vol. C, Table 6.1.1.2)

;

    H  0   112 0.000 0.000

;International Tables for Crystallography

(1992, Vol. C, Table 6.1.1.2)

;

    N  0    20 0.004 0.003

;International Tables for Crystallography

(1992, Vol. C, Table 6.1.1.2)

;

    O  0    16 0.008 0.006

;International Tables for Crystallography

(1992, Vol. C, Table 6.1.1.2)

;

    Cl 0     8 0.132 0.159

;International Tables for Crystallography

(1992, Vol. C, Tables 4.2.6.8 and 6.1.1.1)

;

    Ni 0     4 0.285 1.113

;International Tables for Crystallography

(1992, Vol. C, Tables 4.2.6.8 and 6.1.1.1)

;


#==============================================================================


# ATOMIC COORDINATES AND THERMAL PARAMETERS


loop_

_atom_site_label

_atom_site_fract_x

_atom_site_fract_y

_atom_site_fract_z

_atom_site_U_iso_or_equiv

_atom_site_occupancy

_atom_site_refinement_flags

_atom_site_adp_type

_atom_site_calc_flag

_atom_site_calc_attached_atom

Ni(0) 0.79338(4) 0.86187(4) 0.86457(3) 0.0215(2) 1.000   .  Uani d ?

Cl(1) 0.93137(8) 0.76101(8) 0.88223(7) 0.0303(3) 1.000   .  Uani d ?

Cl(2) 1.20892(10) 0.94784(13) 0.71385(9) 0.0686(6) 1.000   .  Uani d ?

O(1) 0.5894(2) 0.8538(2) 0.6653(2) 0.0293(9) 1.000   .  Uani d ?

O(2) 0.6740(2) 1.1210(2) 1.0101(2) 0.0287(9) 1.000   .  Uani d ?

O(3) 0.2539(3) 0.9436(3) 0.5278(3) 0.089(1) 1.000   .  Uiso d ?

O(4) 0.7543(5) 0.7871(5) 0.3468(4) 0.176(3) 1.000   .  Uiso d ?

N(1) 0.6752(2) 0.9533(3) 0.8456(2) 0.0183(10) 1.000   .  Uani d ?

N(2) 0.6943(3) 0.7562(3) 0.8381(2) 0.0219(11) 1.000   .  Uani d ?

N(3) 0.8429(3) 0.8614(3) 0.7285(2) 0.0230(10) 1.000   .  Uani d ?

N(4) 0.8807(3) 0.9810(3) 0.8934(2) 0.0219(11) 1.000   .  Uani d ?

N(5) 0.7268(3) 0.8711(3) 0.9925(2) 0.0239(11) 1.000   .  Uani d ?

C(1) 0.6403(3) 0.9479(3) 0.7738(3) 0.0209(13) 1.000   .  Uani d ?

C(2) 0.6067(3) 1.0253(3) 0.7369(3) 0.026(1) 1.000   .  Uani d ?

C(3) 0.6046(4) 1.1094(3) 0.7755(3) 0.032(2) 1.000   .  Uani d ?

C(4) 0.6358(3) 1.1134(3) 0.8523(3) 0.026(1) 1.000   .  Uani d ?

C(5) 0.6686(3) 1.0330(3) 0.8860(3) 0.0187(12) 1.000   .  Uani d ?

C(6) 0.6539(3) 0.8555(3) 0.7267(2) 0.0222(12) 1.000   .  Uani d ?

C(7) 0.4749(4) 0.8648(4) 0.6935(3) 0.042(2) 1.000   .  Uani d ?

C(8) 0.6373(3) 0.7653(3) 0.7782(3) 0.0197(12) 1.000   .  Uani d ?

C(9) 0.5729(3) 0.6949(4) 0.7598(3) 0.032(2) 1.000   .  Uani d ?

C(10) 0.5630(4) 0.6139(4) 0.8051(3) 0.038(2) 1.000   .  Uani d ?

C(11) 0.6222(4) 0.6027(3) 0.8651(3) 0.033(2) 1.000   .  Uani d ?

C(12) 0.6876(3) 0.6745(3) 0.8789(3) 0.026(1) 1.000   .  Uani d ?

C(13) 0.7703(3) 0.8564(3) 0.6801(2) 0.0215(12) 1.000   .  Uani d ?

C(14) 0.7947(3) 0.8539(4) 0.5945(3) 0.029(1) 1.000   .  Uani d ?

C(15) 0.9021(4) 0.8592(4) 0.5564(3) 0.032(1) 1.000   .  Uani d ?

C(16) 0.9780(3) 0.8636(3) 0.6042(3) 0.031(1) 1.000   .  Uani d ?

C(17) 0.9465(3) 0.8634(3) 0.6912(3) 0.0282(13) 1.000   .  Uani d ?

C(18) 0.7118(3) 1.0392(3) 0.9655(3) 0.0233(13) 1.000   .  Uani d ?

C(19) 0.5595(3) 1.1279(4) 1.0373(3) 0.035(2) 1.000   .  Uani d ?

C(20) 0.8332(3) 1.0513(3) 0.9408(2) 0.0228(13) 1.000   .  Uani d ?

C(21) 0.8867(3) 1.1247(3) 0.9667(3) 0.029(1) 1.000   .  Uani d ?

C(22) 0.9961(4) 1.1295(4) 0.9428(3) 0.030(1) 1.000   .  Uani d ?

C(23) 1.0470(3) 1.0597(4) 0.8931(3) 0.031(2) 1.000   .  Uani d ?

C(24) 0.9879(3) 0.9868(3) 0.8703(3) 0.028(1) 1.000   .  Uani d ?

C(25) 0.6966(3) 0.9549(3) 1.0245(2) 0.0214(13) 1.000   .  Uani d ?

C(26) 0.6672(3) 0.9684(4) 1.1099(3) 0.028(1) 1.000   .  Uani d ?

C(27) 0.6637(4) 0.8916(4) 1.1616(3) 0.035(2) 1.000   .  Uani d ?

C(28) 0.6919(4) 0.8058(4) 1.1292(3) 0.035(2) 1.000   .  Uani d ?

C(29) 0.7242(3) 0.8004(3) 1.0442(3) 0.032(2) 1.000   .  Uani d ?

C(30) 0.3615(5) 0.9676(5) 0.5075(4) 0.077(2) 1.000   .  Uiso d ?

C(31) 0.8110(7) 0.8475(8) 0.3790(6) 0.060(3) 0.600   S Uiso d ?

C(32) 0.8221(9) 0.8398(9) 0.2968(7) 0.040(3) 0.400   S Uiso d ?

H(1) 0.5847 1.0203 0.6848 0.031 1.000   .  Uiso c ?

H(2) 0.5834 1.1637 0.7503 0.038 1.000   .  Uiso c ?

H(3) 0.6341 1.1708 0.8813 0.032 1.000   .  Uiso c ?

H(4) 0.4371 0.8262 0.6614 0.050 1.000   .  Uiso c ?

H(5) 0.4569 0.8458 0.7513 0.050 1.000   .  Uiso c ?

H(6) 0.4556 0.9283 0.6890 0.050 1.000   .  Uiso c ?

H(7) 0.5349 0.7025 0.7157 0.038 1.000   .  Uiso c ?

H(8) 0.5155 0.5665 0.7944 0.044 1.000   .  Uiso c ?

H(9) 0.6182 0.5470 0.8966 0.040 1.000   .  Uiso c ?

H(10) 0.7312 0.6659 0.9196 0.032 1.000   .  Uiso c ?

H(11) 0.7402 0.8485 0.5626 0.035 1.000   .  Uiso c ?

H(12) 0.9216 0.8597 0.4975 0.038 1.000   .  Uiso c ?

H(13) 1.0513 0.8665 0.5792 0.037 1.000   .  Uiso c ?

H(14) 0.9998 0.8650 0.7246 0.033 1.000   .  Uiso c ?

H(15) 0.4057 0.9141 0.4971 0.098 1.000   .  Uiso c ?

H(16) 0.3723 1.0063 0.4579 0.098 1.000   .  Uiso c ?

H(17) 0.3815 1.0036 0.5518 0.098 1.000   .  Uiso c ?

H(18) 0.8488 1.1721 1.0005 0.034 1.000   .  Uiso c ?

H(19) 1.0353 1.1793 0.9602 0.035 1.000   .  Uiso c ?

H(20) 1.1224 1.0615 0.8749 0.036 1.000   .  Uiso c ?

H(21) 1.0242 0.9383 0.8370 0.033 1.000   .  Uiso c ?

H(22) 0.6494 1.0284 1.1321 0.034 1.000   .  Uiso c ?

H(23) 0.6419 0.8988 1.2200 0.041 1.000   .  Uiso c ?

H(24) 0.6893 0.7522 1.1633 0.042 1.000   .  Uiso c ?

H(25) 0.7466 0.7415 1.0210 0.039 1.000   .  Uiso c ?

H(27) 0.5304 1.0673 1.0498 0.044 1.000   .  Uiso c ?

H(28) 0.5444 1.1664 1.0860 0.044 1.000   .  Uiso c ?

H(29) 0.5291 1.1556 0.9940 0.044 1.000   .  Uiso c ?


loop_

_atom_site_aniso_label

_atom_site_aniso_U_11

_atom_site_aniso_U_22

_atom_site_aniso_U_33

_atom_site_aniso_U_12

_atom_site_aniso_U_13

_atom_site_aniso_U_23

   Ni(0)  0.0262(3)   0.0196(3)   0.0175(3)   -0.0007(3)  -0.0009(2)  -0.0011(3)

   Cl(1)  0.0350(7)   0.0276(7)   0.0291(7)   0.0042(6)   -0.0085(5)  -0.0038(6)

   Cl(2)  0.0464(9)   0.101(2)    0.0509(9)   -0.0131(9)  0.0112(7) 
-0.0240(10)

   O(1)   0.026(2)    0.040(2)    0.023(2)    0.003(2)    -0.0069(13) -0.003(2)

   O(2)   0.031(2)    0.024(2)    0.028(2)    -0.002(2)   0.003(1)    -0.008(2)

   N(1)   0.018(2)    0.020(2)    0.015(2)    -0.003(2)   0.002(2)    -0.000(2)

   N(2)   0.025(2)    0.021(2)    0.019(2)    0.001(2)    -0.003(2)   -0.000(2)

   N(3)   0.026(2)    0.024(2)    0.018(2)    0.001(2)    0.001(2)    -0.002(2)

   N(4)   0.023(2)    0.025(3)    0.017(2)    -0.002(2)   -0.002(2)   0.003(2)

   N(5)   0.033(2)    0.021(2)    0.017(2)    -0.006(2)   -0.003(2)   0.001(2)

   C(1)   0.019(2)    0.023(3)    0.019(3)    0.001(2)    0.000(2)    0.004(2)

   C(2)   0.028(3)    0.032(3)    0.017(3)    0.002(2)    -0.004(2)   -0.001(2)

   C(3)   0.033(3)    0.029(3)    0.031(3)    0.002(2)    -0.002(2)   0.008(2)

   C(4)   0.025(3)    0.023(3)    0.026(3)    -0.003(2)   0.005(2)    -0.005(2)

   C(5)   0.018(2)    0.016(3)    0.020(2)    -0.000(2)   0.002(2)    0.002(2)

   C(6)   0.025(2)    0.028(3)    0.015(2)    0.002(2)    -0.007(2)   -0.004(2)

   C(7)   0.043(3)    0.046(4)    0.040(3)    0.009(3)    -0.019(3)   -0.007(3)

   C(8)   0.020(2)    0.019(3)    0.018(2)    -0.002(2)   0.002(2)    -0.005(2)

   C(9)   0.031(3)    0.039(4)    0.027(3)    -0.007(3)   -0.007(2)   -0.009(3)

   C(10)  0.041(3)    0.030(4)    0.041(3)    -0.011(3)   -0.002(3)   -0.010(3)

   C(11)  0.047(3)    0.023(3)    0.027(3)    -0.006(3)   -0.000(2)   -0.003(2)

   C(12)  0.030(3)    0.028(3)    0.020(3)    0.000(2)    -0.003(2)   -0.004(2)

   C(13)  0.024(2)    0.014(3)    0.024(2)    0.001(2)    0.002(2)    -0.003(2)

   C(14)  0.032(3)    0.029(3)    0.025(3)    0.002(3)    -0.005(2)   -0.001(2)

   C(15)  0.046(3)    0.025(3)    0.021(2)    0.003(3)    0.002(2)    -0.002(3)

   C(16)  0.031(3)    0.025(3)    0.031(3)    0.005(3)    0.008(2)    -0.004(3)

   C(17)  0.031(3)    0.023(3)    0.030(3)    0.003(2)    -0.003(2)   0.000(3)

   C(18)  0.027(3)    0.015(3)    0.024(3)    -0.001(2)   0.005(2)    -0.002(2)

   C(19)  0.033(3)    0.040(4)    0.028(3)    0.012(3)    0.008(2)    -0.003(3)

   C(20)  0.025(3)    0.028(3)    0.015(2)    -0.003(2)   -0.003(2)   0.003(2)

   C(21)  0.031(3)    0.028(3)    0.026(3)    -0.003(2)   -0.001(2)   -0.005(2)

   C(22)  0.037(3)    0.033(3)    0.021(3)    -0.016(3)   -0.010(2)   0.001(3)

   C(23)  0.024(3)    0.043(4)    0.025(3)    -0.010(3)   -0.003(2)   0.008(3)

   C(24)  0.032(3)    0.030(3)    0.019(3)    0.002(2)    0.001(2)    -0.003(2)

   C(25)  0.023(3)    0.025(3)    0.016(2)    -0.008(2)   -0.000(2)   0.000(2)

   C(26)  0.029(3)    0.036(3)    0.017(3)    0.001(2)    -0.001(2)   -0.004(2)

   C(27)  0.026(3)    0.062(4)    0.013(3)    0.000(3)    0.005(2)    0.002(3)

   C(28)  0.042(3)    0.036(4)    0.025(3)    -0.006(3)   -0.002(2)   0.010(3)

   C(29)  0.042(3)    0.031(3)    0.025(3)    -0.003(3)   -0.012(2)   0.005(2)


#==============================================================================


# REFINEMENT DATA


_refine_special_details

;

   ?

;

_refine_ls_structure_factor_coef       Fsqd

_refine_ls_matrix_type                 full

_refine_ls_weighting_scheme            sigma

_refine_ls_weighting_details           'w = 1/[\s^2^(Fo) + 0.00005|Fo|^2^]'

_refine_ls_hydrogen_treatment          noref

_refine_ls_extinction_method           none

_refine_ls_extinction_coef             ?

_refine_ls_abs_structure_details       ?

_refine_ls_abs_structure_Flack         ?

_refine_ls_number_reflns               5180

_refine_ls_number_parameters           372

_refine_ls_number_restraints           0

_refine_ls_number_constraints          0

_refine_ls_R_factor_all                0.0984

_refine_ls_R_factor_gt                 ?

_refine_ls_wR_factor_all               0.0970

_refine_ls_wR_factor_ref               ?

_refine_ls_goodness_of_fit_all         1.207

_refine_ls_goodness_of_fit_ref         1.210

_refine_ls_shift/su_max                0.0100

_refine_ls_shift/su_mean               0.0004

_refine_diff_density_min               0.00

_refine_diff_density_max               0.00


#==============================================================================


# MOLECULAR GEOMETRY


_geom_special_details

;

   ?

;

loop_

_geom_bond_atom_site_label_1

_geom_bond_atom_site_label_2

_geom_bond_distance

_geom_bond_site_symmetry_1

_geom_bond_site_symmetry_2

_geom_bond_publ_flag

   Ni Cl(1) 2.3389(13) . . ?

   Ni N(1) 2.066(4) . . ?

   Ni N(2) 2.076(4) . . ?

   Ni N(3) 2.204(3) . . ?

   Ni N(4) 2.146(4) . . ?

   Ni N(5) 2.116(4) . . ?

   O(1) C(6) 1.416(4) . . ?

   O(1) C(7) 1.453(5) . . ?

   O(2) C(18) 1.421(5) . . ?

   O(2) C(19) 1.447(5) . . ?

   O(3) C(30) 1.392(7) . . ?

   O(4) C(31) 1.305(11) . . ?

   O(4) C(32) 1.32(1) . . ?

   N(1) C(1) 1.339(5) . . ?

   N(1) C(5) 1.320(6) . . ?

   N(2) C(8) 1.334(5) . . ?

   N(2) C(12) 1.348(6) . . ?

   N(3) C(13) 1.331(5) . . ?

   N(3) C(17) 1.347(5) . . ?

   N(4) C(20) 1.348(6) . . ?

   N(4) C(24) 1.350(5) . . ?

   N(5) C(25) 1.343(6) . . ?

   N(5) C(29) 1.321(6) . . ?

   C(1) C(2) 1.373(6) . . ?

   C(1) C(6) 1.531(6) . . ?

   C(2) C(3) 1.364(7) . . ?

   C(2) H(1) 0.95 . . no

   C(3) C(4) 1.393(6) . . ?

   C(3) H(2) 0.95 . . no

   C(4) C(5) 1.379(6) . . ?

   C(4) H(3) 0.95 . . no

   C(5) C(18) 1.513(6) . . ?

   C(6) C(8) 1.541(7) . . ?

   C(6) C(13) 1.537(6) . . ?

   C(7) H(4) 0.96 . . no

   C(7) H(5) 0.97 . . no

   C(7) H(6) 0.95 . . no

   C(8) C(9) 1.373(6) . . ?

   C(9) C(10) 1.375(7) . . ?

   C(9) H(7) 0.95 . . no

   C(10) C(11) 1.359(6) . . ?

   C(10) H(8) 0.95 . . no

   C(11) C(12) 1.373(7) . . ?

   C(11) H(9) 0.95 . . no

   C(12) H(10) 0.95 . . no

   C(13) C(14) 1.382(6) . . ?

   C(14) C(15) 1.396(6) . . ?

   C(14) H(11) 0.95 . . no

   C(15) C(16) 1.358(6) . . ?

   C(15) H(12) 0.95 . . no

   C(16) C(17) 1.409(6) . . ?

   C(16) H(13) 0.95 . . no

   C(17) H(14) 0.95 . . no

   C(18) C(20) 1.534(6) . . ?

   C(18) C(25) 1.541(6) . . ?

   C(19) H(27) 0.95 . . no

   C(19) H(28) 0.96 . . no

   C(19) H(29) 0.96 . . no

   C(20) C(21) 1.368(6) . . ?

   C(21) C(22) 1.377(6) . . ?

   C(21) H(18) 0.95 . . no

   C(22) C(23) 1.377(7) . . ?

   C(22) H(19) 0.95 . . no

   C(23) C(24) 1.384(7) . . ?

   C(23) H(20) 0.95 . . no

   C(24) H(21) 0.95 . . no

   C(25) C(26) 1.395(6) . . ?

   C(26) C(27) 1.389(7) . . ?

   C(26) H(22) 0.95 . . no

   C(27) C(28) 1.366(7) . . ?

   C(27) H(23) 0.95 . . no

   C(28) C(29) 1.381(6) . . ?

   C(28) H(24) 0.95 . . no

   C(29) H(25) 0.95 . . no

   C(30) H(15) 0.95 . . no

   C(30) H(16) 0.98 . . no

   C(30) H(17) 0.97 . . no

   C(31) C(32) 1.33(2) . . ?

#------------------------------------------------------------------------------

loop_

_geom_angle_atom_site_label_1

_geom_angle_atom_site_label_2

_geom_angle_atom_site_label_3

_geom_angle

_geom_angle_site_symmetry_1

_geom_angle_site_symmetry_2

_geom_angle_site_symmetry_3

_geom_angle_publ_flag

   Cl(1) Ni  N(1) 177.96(10) . . . ?

   Cl(1) Ni  N(2) 94.18(11) . . . ?

   Cl(1) Ni  N(3) 92.55(11) . . . ?

   Cl(1) Ni  N(4) 91.99(11) . . . ?

   Cl(1) Ni  N(5) 94.98(11) . . . ?

   N(1) Ni  N(2) 86.9(1) . . . ?

   N(1) Ni  N(3) 85.9(1) . . . ?

   N(1) Ni  N(4) 87.0(2) . . . ?

   N(1) Ni  N(5) 86.6(1) . . . ?

   N(2) Ni  N(3) 81.7(2) . . . ?

   N(2) Ni  N(4) 173.7(2) . . . ?

   N(2) Ni  N(5) 96.2(2) . . . ?

   N(3) Ni  N(4) 99.5(1) . . . ?

   N(3) Ni  N(5) 172.3(2) . . . ?

   N(4) Ni  N(5) 81.9(1) . . . ?

   C(6) O(1)  C(7) 117.0(3) . . . ?

   C(18) O(2)  C(19) 116.1(4) . . . ?

   C(31) O(4)  C(32) 61.2(8) . . . ?

   Ni N(1)  C(1) 117.9(3) . . . ?

   Ni N(1)  C(5) 117.2(3) . . . ?

   C(1) N(1)  C(5) 119.5(4) . . . ?

   Ni N(2)  C(8) 121.3(3) . . . ?

   Ni N(2)  C(12) 121.3(3) . . . ?

   C(8) N(2)  C(12) 117.3(4) . . . ?

   Ni N(3)  C(13) 120.4(3) . . . ?

   Ni N(3)  C(17) 122.0(3) . . . ?

   C(13) N(3)  C(17) 117.5(4) . . . ?

   Ni N(4)  C(20) 122.1(3) . . . ?

   Ni N(4)  C(24) 121.8(3) . . . ?

   C(20) N(4)  C(24) 115.9(4) . . . ?

   Ni N(5)  C(25) 118.5(3) . . . ?

   Ni N(5)  C(29) 123.1(4) . . . ?

   C(25) N(5)  C(29) 118.0(4) . . . ?

   N(1) C(1)  C(2) 121.6(5) . . . ?

   N(1) C(1)  C(6) 118.1(4) . . . ?

   C(2) C(1)  C(6) 119.7(4) . . . ?

   C(1) C(2)  C(3) 119.6(5) . . . ?

   C(1) C(2)  H(1) 120.2 . . . no

   C(3) C(2)  H(1) 120.2 . . . no

   C(2) C(3)  C(4) 118.3(5) . . . ?

   C(2) C(3)  H(2) 120.8 . . . no

   C(4) C(3)  H(2) 120.9 . . . no

   C(3) C(4)  C(5) 119.2(5) . . . ?

   C(3) C(4)  H(3) 120.4 . . . no

   C(5) C(4)  H(3) 120.5 . . . no

   N(1) C(5)  C(4) 121.5(4) . . . ?

   N(1) C(5)  C(18) 119.1(4) . . . ?

   C(4) C(5)  C(18) 118.9(4) . . . ?

   O(1) C(6)  C(1) 110.5(4) . . . ?

   O(1) C(6)  C(8) 109.7(4) . . . ?

   O(1) C(6)  C(13) 106.3(3) . . . ?

   C(1) C(6)  C(8) 117.6(4) . . . ?

   C(1) C(6)  C(13) 104.5(4) . . . ?

   C(8) C(6)  C(13) 107.5(4) . . . ?

   O(1) C(7)  H(4) 110.0 . . . no

   O(1) C(7)  H(5) 108.7 . . . no

   O(1) C(7)  H(6) 109.7 . . . no

   H(4) C(7)  H(5) 108.9 . . . no

   H(4) C(7)  H(6) 110.4 . . . no

   H(5) C(7)  H(6) 109.1 . . . no

   N(2) C(8)  C(6) 116.7(4) . . . ?

   N(2) C(8)  C(9) 121.4(5) . . . ?

   C(6) C(8)  C(9) 121.8(4) . . . ?

   C(8) C(9)  C(10) 120.3(5) . . . ?

   C(8) C(9)  H(7) 119.6 . . . no

   C(10) C(9)  H(7) 120.0 . . . no

   C(9) C(10)  C(11) 119.0(5) . . . ?

   C(9) C(10)  H(8) 120.4 . . . no

   C(11) C(10)  H(8) 120.6 . . . no

   C(10) C(11)  C(12) 117.9(5) . . . ?

   C(10) C(11)  H(9) 120.9 . . . no

   C(12) C(11)  H(9) 121.2 . . . no

   N(2) C(12)  C(11) 123.9(4) . . . ?

   N(2) C(12)  H(10) 118.0 . . . no

   C(11) C(12)  H(10) 118.0 . . . no

   N(3) C(13)  C(6) 114.7(4) . . . ?

   N(3) C(13)  C(14) 124.1(4) . . . ?

   C(6) C(13)  C(14) 121.2(4) . . . ?

   C(13) C(14)  C(15) 117.9(4) . . . ?

   C(13) C(14)  H(11) 121.0 . . . no

   C(15) C(14)  H(11) 121.0 . . . no

   C(14) C(15)  C(16) 119.3(4) . . . ?

   C(14) C(15)  H(12) 120.2 . . . no

   C(16) C(15)  H(12) 120.5 . . . no

   C(15) C(16)  C(17) 119.2(4) . . . ?

   C(15) C(16)  H(13) 120.2 . . . no

   C(17) C(16)  H(13) 120.6 . . . no

   N(3) C(17)  C(16) 122.0(4) . . . ?

   N(3) C(17)  H(14) 119.0 . . . no

   C(16) C(17)  H(14) 119.0 . . . no

   O(2) C(18)  C(5) 110.5(4) . . . ?

   O(2) C(18)  C(20) 105.7(4) . . . ?

   O(2) C(18)  C(25) 109.7(4) . . . ?

   C(5) C(18)  C(20) 106.9(4) . . . ?

   C(5) C(18)  C(25) 118.1(4) . . . ?

   C(20) C(18)  C(25) 105.0(4) . . . ?

   O(2) C(19)  H(27) 109.5 . . . no

   O(2) C(19)  H(28) 109.1 . . . no

   O(2) C(19)  H(29) 108.9 . . . no

   H(27) C(19)  H(28) 109.8 . . . no

   H(27) C(19)  H(29) 110.1 . . . no

   H(28) C(19)  H(29) 109.4 . . . no

   N(4) C(20)  C(18) 112.9(4) . . . ?

   N(4) C(20)  C(21) 124.2(4) . . . ?

   C(18) C(20)  C(21) 122.9(4) . . . ?

   C(20) C(21)  C(22) 119.3(5) . . . ?

   C(20) C(21)  H(18) 120.5 . . . no

   C(22) C(21)  H(18) 120.3 . . . no

   C(21) C(22)  C(23) 118.0(5) . . . ?

   C(21) C(22)  H(19) 121.1 . . . no

   C(23) C(22)  H(19) 120.9 . . . no

   C(22) C(23)  C(24) 119.6(4) . . . ?

   C(22) C(23)  H(20) 120.1 . . . no

   C(24) C(23)  H(20) 120.3 . . . no

   N(4) C(24)  C(23) 123.0(5) . . . ?

   N(4) C(24)  H(21) 118.2 . . . no

   C(23) C(24)  H(21) 118.8 . . . no

   N(5) C(25)  C(18) 117.9(4) . . . ?

   N(5) C(25)  C(26) 121.5(5) . . . ?

   C(18) C(25)  C(26) 119.9(5) . . . ?

   C(25) C(26)  C(27) 118.4(5) . . . ?

   C(25) C(26)  H(22) 120.9 . . . no

   C(27) C(26)  H(22) 120.7 . . . no

   C(26) C(27)  C(28) 120.3(5) . . . ?

   C(26) C(27)  H(23) 119.9 . . . no

   C(28) C(27)  H(23) 119.8 . . . no

   C(27) C(28)  C(29) 116.9(5) . . . ?

   C(27) C(28)  H(24) 121.8 . . . no

   C(29) C(28)  H(24) 121.3 . . . no

   N(5) C(29)  C(28) 124.9(5) . . . ?

   N(5) C(29)  H(25) 117.3 . . . no

   C(28) C(29)  H(25) 117.7 . . . no

   O(3) C(30)  H(15) 111.5 . . . no

   O(3) C(30)  H(16) 108.7 . . . no

   O(3) C(30)  H(17) 110.0 . . . no

   H(15) C(30)  H(16) 109.0 . . . no

   H(15) C(30)  H(17) 109.8 . . . no

   H(16) C(30)  H(17) 107.7 . . . no

   O(4) C(31)  C(32) 59.8(8) . . . ?

   O(4) C(32)  C(31) 59.0(8) . . . ?

#------------------------------------------------------------------------------

loop_

_geom_contact_atom_site_label_1

_geom_contact_atom_site_label_2

_geom_contact_distance

_geom_contact_site_symmetry_1

_geom_contact_site_symmetry_2

_geom_contact_publ_flag

   Cl(1)     C(3)      3.483(5)   . 2_646 no

   Cl(1)     C(22)     3.549(5)   . 3_777 no

   Cl(2)     O(3)      3.001(5)   . 1_655 no

   Cl(2)     C(32)     3.09(2)    . 3_776 no

   Cl(2)     C(31)     3.345(12)  . 3_776 no

   Cl(2)     C(24)     3.482(5)   . . no

   Cl(2)     C(7)      3.550(5)   . 1_655 no

   Cl(2)     C(30)     3.586(7)   . 1_655 no

   O(2)      O(4)      3.589(8)   . 2_656 no

   O(3)      C(12)     3.218(7)   . 4_464 no

   O(3)      C(31)     3.404(13)  . 3_676 no

   O(3)      C(11)     3.476(7)   . 4_464 no

   O(3)      C(29)     3.536(8)   . 4_464 no

   N(1)      C(19)     3.443(6)   . 3_677 no

   N(2)      C(3)      3.565(6)   . 2_646 no

   C(3)      C(27)     3.381(7)   . 3_677 no

   C(3)      C(12)     3.434(7)   . 2_656 no

   C(9)      C(32)     3.180(13)  . 4_465 no

   C(9)      C(31)     3.591(11)  . 4_465 no

   C(10)     C(32)     3.17(1)    . 4_465 no

   C(10)     C(31)     3.260(11)  . 4_465 no

   C(10)     C(24)     3.574(7)   . 2_646 no

   C(14)     C(31)     3.506(11)  . . no

   C(15)     C(31)     3.336(11)  . . no

   C(22)     C(24)     3.533(7)   . 3_777 no

   C(23)     C(32)     3.55(1)    . 3_776 no

   C(27)     C(32)     3.352(13)  . 1_556 no

   C(28)     C(32)     3.504(13)  . 1_556 no

#------------------------------------------------------------------------------

loop_

_geom_torsion_atom_site_label_1

_geom_torsion_atom_site_label_2

_geom_torsion_atom_site_label_3

_geom_torsion_atom_site_label_4

_geom_torsion_site_symmetry_1

_geom_torsion_site_symmetry_2

_geom_torsion_site_symmetry_3

_geom_torsion_site_symmetry_4

_geom_torsion

_geom_torsion_publ_flag

   Ni N(1) C(1) C(2) . . . . -147.2(4) no

   Ni N(1) C(1) C(6) . . . . 23.9(5) no

   Ni N(1) C(5) C(4) . . . . 147.4(4) no

   Ni N(1) C(5) C(18) . . . . -24.3(5) no

   Ni N(2) C(8) C(6) . . . . 3.4(5) no

   Ni N(2) C(8) C(9) . . . . 179.0(3) no

   Ni N(2) C(12) C(11) . . . . 178.8(4) no

   Ni N(3) C(13) C(6) . . . . 2.5(6) no

   Ni N(3) C(13) C(14) . . . . -178.6(4) no

   Ni N(3) C(17) C(16) . . . . -179.7(4) no

   Ni N(4) C(20) C(18) . . . . -3.9(5) no

   Ni N(4) C(20) C(21) . . . . 174.2(4) no

   Ni N(4) C(24) C(23) . . . . -175.3(4) no

   Ni N(5) C(25) C(18) . . . . 0.4(5) no

   Ni N(5) C(25) C(26) . . . . -170.2(3) no

   Ni N(5) C(29) C(28) . . . . 172.9(4) no

   Cl(1) Ni N(1) C(1) . . . . 66.9(33) no

   Cl(1) Ni N(1) C(5) . . . . -87.1(32) no

   Cl(1) Ni N(2) C(8) . . . . -138.7(3) no

   Cl(1) Ni N(2) C(12) . . . . 39.1(4) no

   Cl(1) Ni N(3) C(13) . . . . 138.1(4) no

   Cl(1) Ni N(3) C(17) . . . . -40.0(4) no

   Cl(1) Ni N(4) C(20) . . . . -139.3(3) no

   Cl(1) Ni N(4) C(24) . . . . 35.7(3) no

   Cl(1) Ni N(5) C(25) . . . . 136.3(3) no

   Cl(1) Ni N(5) C(29) . . . . -35.9(4) no

   O(1) C(6) C(1) N(1) . . . . 164.8(4) no

   O(1) C(6) C(1) C(2) . . . . -24.0(6) no

   O(1) C(6) C(8) N(2) . . . . 179.1(4) no

   O(1) C(6) C(8) C(9) . . . . 3.5(6) no

   O(1) C(6) C(13) N(3) . . . . 177.7(4) no

   O(1) C(6) C(13) C(14) . . . . -1.2(7) no

   O(2) C(18) C(5) N(1) . . . . -165.2(4) no

   O(2) C(18) C(5) C(4) . . . . 22.9(6) no

   O(2) C(18) C(20) N(4) . . . . -176.4(4) no

   O(2) C(18) C(20) C(21) . . . . 5.5(6) no

   O(2) C(18) C(25) N(5) . . . . 179.1(4) no

   O(2) C(18) C(25) C(26) . . . . -10.2(6) no

   N(1) Ni N(2) C(8) . . . . 39.5(3) no

   N(1) Ni N(2) C(12) . . . . -142.7(4) no

   N(1) Ni N(3) C(13) . . . . -43.2(4) no

   N(1) Ni N(3) C(17) . . . . 138.7(4) no

   N(1) Ni N(4) C(20) . . . . 42.5(4) no

   N(1) Ni N(4) C(24) . . . . -142.6(4) no

   N(1) Ni N(5) C(25) . . . . -42.4(3) no

   N(1) Ni N(5) C(29) . . . . 145.3(4) no

   N(1) C(1) C(2) C(3) . . . . -2.7(7) no

   N(1) C(1) C(6) C(8) . . . . 37.8(6) no

   N(1) C(1) C(6) C(13) . . . . -81.3(5) no

   N(1) C(5) C(4) C(3) . . . . 2.8(7) no

   N(1) C(5) C(18) C(20) . . . . 80.3(5) no

   N(1) C(5) C(18) C(25) . . . . -37.7(6) no

   N(2) Ni N(1) C(1) . . . . -54.0(3) no

   N(2) Ni N(1) C(5) . . . . 152.0(3) no

   N(2) Ni N(3) C(13) . . . . 44.3(4) no

   N(2) Ni N(3) C(17) . . . . -133.9(4) no

   N(2) Ni N(4) C(20) . . . . 27.9(15) no

   N(2) Ni N(4) C(24) . . . . -157.1(12) no

   N(2) Ni N(5) C(25) . . . . -128.9(3) no

   N(2) Ni N(5) C(29) . . . . 58.9(4) no

   N(2) C(8) C(6) C(1) . . . . -53.6(5) no

   N(2) C(8) C(6) C(13) . . . . 63.9(5) no

   N(2) C(8) C(9) C(10) . . . . 2.2(8) no

   N(2) C(12) C(11) C(10) . . . . 1.9(8) no

   N(3) Ni N(1) C(1) . . . . 27.8(3) no

   N(3) Ni N(1) C(5) . . . . -126.2(3) no

   N(3) Ni N(2) C(8) . . . . -46.7(3) no

   N(3) Ni N(2) C(12) . . . . 131.0(4) no

   N(3) Ni N(4) C(20) . . . . 127.8(3) no

   N(3) Ni N(4) C(24) . . . . -57.2(4) no

   N(3) Ni N(5) C(25) . . . . -55.7(13) no

   N(3) Ni N(5) C(29) . . . . 132.0(11) no

   N(3) C(13) C(6) C(1) . . . . 60.9(5) no

   N(3) C(13) C(6) C(8) . . . . -64.9(5) no

   N(3) C(13) C(14) C(15) . . . . -1.6(8) no

   N(3) C(17) C(16) C(15) . . . . -1.7(9) no

   N(4) Ni N(1) C(1) . . . . 127.6(3) no

   N(4) Ni N(1) C(5) . . . . -26.4(3) no

   N(4) Ni N(2) C(8) . . . . 54.1(14) no

   N(4) Ni N(2) C(12) . . . . -128.1(12) no

   N(4) Ni N(3) C(13) . . . . -129.4(4) no

   N(4) Ni N(3) C(17) . . . . 52.4(4) no

   N(4) Ni N(5) C(25) . . . . 45.0(3) no

   N(4) Ni N(5) C(29) . . . . -127.2(4) no

   N(4) C(20) C(18) C(5) . . . . -58.6(5) no

   N(4) C(20) C(18) C(25) . . . . 67.6(5) no

   N(4) C(20) C(21) C(22) . . . . 1.0(7) no

   N(4) C(24) C(23) C(22) . . . . 1.1(8) no

   N(5) Ni N(1) C(1) . . . . -150.4(3) no

   N(5) Ni N(1) C(5) . . . . 55.6(3) no

   N(5) Ni N(2) C(8) . . . . 125.8(3) no

   N(5) Ni N(2) C(12) . . . . -56.4(4) no

   N(5) Ni N(3) C(13) . . . . -29.9(14) no

   N(5) Ni N(3) C(17) . . . . 152.0(11) no

   N(5) Ni N(4) C(20) . . . . -44.6(3) no

   N(5) Ni N(4) C(24) . . . . 130.4(4) no

   N(5) C(25) C(18) C(5) . . . . 51.2(6) no

   N(5) C(25) C(18) C(20) . . . . -67.8(5) no

   N(5) C(25) C(26) C(27) . . . . -3.8(7) no

   N(5) C(29) C(28) C(27) . . . . -2.1(8) no

   C(1) N(1) C(5) C(4) . . . . -6.2(7) no

   C(1) N(1) C(5) C(18) . . . . -177.9(4) no

   C(1) C(2) C(3) C(4) . . . . -0.7(7) no

   C(1) C(6) O(1) C(7) . . . . -59.5(5) no

   C(1) C(6) C(8) C(9) . . . . 130.8(5) no

   C(1) C(6) C(13) C(14) . . . . -118.0(5) no

   C(2) C(1) N(1) C(5) . . . . 6.2(7) no

   C(2) C(1) C(6) C(8) . . . . -150.9(4) no

   C(2) C(1) C(6) C(13) . . . . 90.0(5) no

   C(2) C(3) C(4) C(5) . . . . 0.7(7) no

   C(3) C(2) C(1) C(6) . . . . -173.6(4) no

   C(3) C(4) C(5) C(18) . . . . 174.5(4) no

   C(4) C(5) C(18) C(20) . . . . -91.7(5) no

   C(4) C(5) C(18) C(25) . . . . 150.4(4) no

   C(5) N(1) C(1) C(6) . . . . 177.3(4) no

   C(5) C(18) O(2) C(19) . . . . 62.1(5) no

   C(5) C(18) C(20) C(21) . . . . 123.3(5) no

   C(5) C(18) C(25) C(26) . . . . -138.1(4) no

   C(6) C(8) N(2) C(12) . . . . -174.4(4) no

   C(6) C(8) C(9) C(10) . . . . 177.6(5) no

   C(6) C(13) N(3) C(17) . . . . -179.3(4) no

   C(6) C(13) C(14) C(15) . . . . 177.1(5) no

   C(7) O(1) C(6) C(8) . . . . 71.8(5) no

   C(7) O(1) C(6) C(13) . . . . -172.3(4) no

   C(8) N(2) C(12) C(11) . . . . -3.3(7) no

   C(8) C(6) C(13) C(14) . . . . 116.2(5) no

   C(8) C(9) C(10) C(11) . . . . -3.5(8) no

   C(9) C(8) N(2) C(12) . . . . 1.2(7) no

   C(9) C(8) C(6) C(13) . . . . -111.7(5) no

   C(9) C(10) C(11) C(12) . . . . 1.6(8) no

   C(13) N(3) C(17) C(16) . . . . 2.1(8) no

   C(13) C(14) C(15) C(16) . . . . 2.1(8) no

   C(14) C(13) N(3) C(17) . . . . -0.4(8) no

   C(14) C(15) C(16) C(17) . . . . -0.5(9) no

   C(18) C(20) N(4) C(24) . . . . -179.2(4) no

   C(18) C(20) C(21) C(22) . . . . 178.9(4) no

   C(18) C(25) N(5) C(29) . . . . 173.1(4) no

   C(18) C(25) C(26) C(27) . . . . -174.2(4) no

   C(19) O(2) C(18) C(20) . . . . 177.4(4) no

   C(19) O(2) C(18) C(25) . . . . -69.9(5) no

   C(20) N(4) C(24) C(23) . . . . 0.0(7) no

   C(20) C(18) C(25) C(26) . . . . 103.0(5) no

   C(20) C(21) C(22) C(23) . . . . 0.2(7) no

   C(21) C(20) N(4) C(24) . . . . -1.1(7) no

   C(21) C(20) C(18) C(25) . . . . -110.5(5) no

   C(21) C(22) C(23) C(24) . . . . -1.2(7) no

   C(25) N(5) C(29) C(28) . . . . 0.6(8) no

   C(25) C(26) C(27) C(28) . . . . 2.2(8) no

   C(26) C(25) N(5) C(29) . . . . 2.4(7) no

   C(26) C(27) C(28) C(29) . . . . 0.5(8) no

#------------------------------------------------------------------------------


#==============================================================================

# Additional structures and associated data_? identifiers

# should be added at this point if there is more than one

# structure analysis in the CIF.

#===END

data_General


#==============================================================================


_audit_creation_date                  '19100-09-01'

_audit_creation_method                'by teXsan for Windows v1.0'

_audit_update_record

;

?

;


#==============================================================================


# SUBMISSION DETAILS


_publ_requested_journal               ' ENTER JOURNAL NAME HERE'


_publ_requested_category            ' CHOOSE FI FM FO CI CM CO or AD'


_publ_contact_author_name           ' ENTER CONTACT NAME HERE'


_publ_contact_author_address

;

      ENTER ADDRESS

;

_publ_contact_letter

;

      ENTER TEXT OF LETTER

;


_publ_requested_coeditor_name          ?

_publ_contact_author_phone            ' ENTER PHONE NUMBER '

_publ_contact_author_fax              ' ENTER FAX NUMBER '

_publ_contact_author_email            ' ENTER EMAIL ADDRESS '


#==============================================================================


# PROCESSING SUMMARY (IUCr Office Use Only)


_journal_date_recd_electronic     ?

_journal_date_to_coeditor         ?

_journal_date_from_coeditor       ?

_journal_date_accepted            ?

_journal_date_printers_first      ?

_journal_date_printers_final      ?

_journal_date_proofs_out          ?

_journal_date_proofs_in           ?

_journal_coeditor_name            ?

_journal_coeditor_code            ?

_journal_coeditor_notes

; ?

;

_journal_techeditor_code          ?

_journal_techeditor_notes

; ?

;

_journal_coden_ASTM               ?

_journal_name_full                ?

_journal_year                     ?

_journal_volume                   ?

_journal_issue                    ?

_journal_page_first               ?

_journal_page_last                ?

_journal_suppl_publ_number        ?

_journal_suppl_publ_pages         ?


#==============================================================================


# TITLE AND AUTHOR LIST


_publ_section_title

;

      ENTER SECTION TITLE

;


_publ_section_title_footnote

;

      ENTER ANY FOOTNOTES TO TITLE

;

loop_

_publ_author_name

_publ_author_footnote

_publ_author_address

' FIRST AUTHORS NAME '

;

    FIRST AUTHORS FOOTNOTES

;

;

    FIRST AUTHORS ADDRESS

;


#==============================================================================


# TEXT


_publ_section_abstract

;

      ENTER ABSTRACT

;


_publ_section_exptl_refinement

;

      ENTER EXPERIMENTAL SECTION

;


_publ_section_comment

;

      ENTER TEXT

;


_publ_section_references

;

      ENTER OTHER REFERENCES


Molecular Structure Corporation. (1997-1998). teXsan for Windows version 1.03.

Single Crystal Structure Analysis Software. Version 1.04.

MSC, 3200 Research Forest Drive, The Woodlands, TX 77381, USA.


Sheldrick, G.M. (1985). In: "Crystallographic

Computing 3" (Eds G.M. Sheldrick, C. Kruger and

R. Goddard) Oxford University Press, pp. 175-189.

;


_publ_section_acknowledgements

;

      ENTER ACKNOWLEDGEMENTS

;


_publ_section_table_legends

;

      ENTER TABLE LEGENDS

;


_publ_section_figure_captions

;

      ENTER FIGURE CAPTIONS

;


#==============================================================================


loop_

_publ_manuscript_incl_extra_item

'_geom_extra_table_head_3'

'_geom_bond_atom_site_label_D'

'_geom_bond_atom_site_label_H'

'_geom_contact_atom_site_label_A'

'_geom_bond_distance_DH'

'_geom_contact_distance_HA'

'_geom_contact_distance_DA'

'_geom_angle_DHA'

'_geom_contact_site_symmetry_A'

#

#

#------------------------------------------------------------------------------

data__rtj64


#==============================================================================


_computing_data_collection            'MSC/AFC Diffractometer Control'

_computing_cell_refinement            'MSC/AFC Diffractometer Control'

_computing_data_reduction             'teXsan for Windows (MSC, 1997)'

_computing_structure_solution

;

SHELXS86 (Sheldrick, 1985)

;

_computing_structure_refinement       'teXsan for Windows (MSC, 1997)'

_computing_publication_material       'teXsan for Windows (MSC, 1997)'

#------------------------------------------------------------------------------

_cell_length_a                         10.7075(3)

_cell_length_b                         14.5730(2)

_cell_length_c                         18.7159(5)

_cell_angle_alpha                      90

_cell_angle_beta                       93.648(1)

_cell_angle_gamma                      90

_cell_volume                           2914.5(1)

_cell_formula_units_Z                  4

_cell_measurement_temperature          175

_cell_measurement_reflns_used          4695

_cell_measurement_theta_min            1.39

_cell_measurement_theta_max            26.1

#------------------------------------------------------------------------------

_symmetry_cell_setting                 monoclinic

_symmetry_space_group_name_H-M        'P 21/c     '

_symmetry_Int_Tables_number            14

_symmetry_space_group_name_Hall        ?

loop_

_symmetry_equiv_pos_as_xyz

    '   +x,   +y,   +z'

    '   -x,1/2+y,1/2-z'

    '   -x,   -y,   -z'

    '   +x,1/2-y,1/2+z'

#------------------------------------------------------------------------------


_publ_section_exptl_prep

;

      ENTER EXPERIMENTAL SECTION

;

_exptl_crystal_description            'rhombic'

_exptl_crystal_colour                 'colorless'

_exptl_crystal_size_max                0.17

_exptl_crystal_size_mid                0.13

_exptl_crystal_size_min                0.03

_exptl_crystal_density_diffrn          1.591

_exptl_crystal_density_meas            'not measured'

_chemical_formula_weight               697.99

_chemical_formula_analytical           ?

_chemical_formula_sum                  'C29 H27 Cl3 N5 O3 Zn1.50 '

_chemical_formula_moiety               '?'

_chemical_formula_structural           ?

_chemical_compound_source              ?

_exptl_crystal_F_000                   1424.00

_exptl_absorpt_coefficient_mu          1.560

_exptl_absorpt_correction_type         empirical

_exptl_special_details

;

   ?

;


#==============================================================================


# EXPERIMENTAL DATA


_diffrn_special_details

;

   ?

;

_diffrn_ambient_temperature            175

_diffrn_radiation_wavelength           0.7107

_diffrn_radiation_type                 'Mo K\a'

_diffrn_radiation_source              'X-ray tube'

_diffrn_radiation_monochromator        graphite

_diffrn_radiation_detector            'scintillation counter'

_diffrn_measurement_device            'unknown'

_diffrn_measurement_method            ?


_diffrn_standards_number              0

_diffrn_standards_interval_count      0

_diffrn_standards_decay_%             0.00

loop_

_diffrn_standard_refln_index_h

_diffrn_standard_refln_index_k

_diffrn_standard_refln_index_l


_diffrn_reflns_number                  13817

_reflns_number_total                   5344

_reflns_number_gt                      5108

_reflns_threshold_expression           I>0.00\s(I)

_diffrn_reflns_av_R_equivalents        0.07162

_diffrn_reflns_av_sigmaI/netI          0.174

_diffrn_reflns_limit_h_min             -13

_diffrn_reflns_limit_h_max             12

_diffrn_reflns_limit_k_min             -17

_diffrn_reflns_limit_k_max             10

_diffrn_reflns_limit_l_min             -21

_diffrn_reflns_limit_l_max             22

_diffrn_reflns_theta_min               1.39

_diffrn_reflns_theta_max               26.10

_diffrn_reflns_reduction_process      'Lp corrections applied'

_diffrn_orient_matrix_UB_11            0.00000

_diffrn_orient_matrix_UB_12            0.00000

_diffrn_orient_matrix_UB_13            0.00000

_diffrn_orient_matrix_UB_21            0.00000

_diffrn_orient_matrix_UB_22            0.00000

_diffrn_orient_matrix_UB_23            0.00000

_diffrn_orient_matrix_UB_31            0.00000

_diffrn_orient_matrix_UB_32            0.00000

_diffrn_orient_matrix_UB_33            0.00000

#------------------------------------------------------------------------------

loop_

_atom_type_symbol

_atom_type_oxidation_number

_atom_type_number_in_cell

_atom_type_scat_dispersion_real

_atom_type_scat_dispersion_imag

_atom_type_scat_source

    C  0   116 0.002 0.002

;International Tables for Crystallography

(1992, Vol. C, Table 6.1.1.2)

;

    H  0   108 0.000 0.000

;International Tables for Crystallography

(1992, Vol. C, Table 6.1.1.2)

;

    N  0    20 0.004 0.003

;International Tables for Crystallography

(1992, Vol. C, Table 6.1.1.2)

;

    O  0    12 0.008 0.006

;International Tables for Crystallography

(1992, Vol. C, Table 6.1.1.2)

;

    Cl 0    12 0.132 0.159

;International Tables for Crystallography

(1992, Vol. C, Tables 4.2.6.8 and 6.1.1.1)

;

    Zn 0     6 0.222 1.431

;International Tables for Crystallography

(1992, Vol. C, Tables 4.2.6.8 and 6.1.1.1)

;


#==============================================================================


# ATOMIC COORDINATES AND THERMAL PARAMETERS


loop_

_atom_site_label

_atom_site_fract_x

_atom_site_fract_y

_atom_site_fract_z

_atom_site_U_iso_or_equiv

_atom_site_occupancy

_atom_site_refinement_flags

_atom_site_adp_type

_atom_site_calc_flag

_atom_site_calc_attached_atom

Zn(1) 0.17523(8) -0.40296(6) 0.30971(5) 0.0207(2) 1.000   .  Uani d ?

Zn(2) 0.5255(2) 0.4875(2) 0.0266(1) 0.0578(8) 0.500   S Uani d ?

Cl(1) 0.3414(2) -0.3110(1) 0.2824(1) 0.0313(6) 1.000   .  Uani d ?

Cl(2) 0.6737(3) 0.4093(3) 0.0936(2) 0.0294(9) 0.500   S Uiso d ?

Cl(3) 0.4777(6) 0.6101(4) 0.0876(3) 0.085(2) 0.500   S Uiso d ?

Cl(4) 0.603(1) 0.5408(9) -0.0784(7) 0.224(5) 0.500   S Uiso d ?

Cl(5) 0.3310(7) 0.4101(6) 0.0254(4) 0.124(3) 0.500   S Uiso d ?

O(1) 0.1754(5) -0.6593(3) 0.4560(3) 0.027(2) 1.000   .  Uani d ?

O(2) -0.2421(4) -0.3930(4) 0.2288(3) 0.029(2) 1.000   .  Uani d ?

O(3) 0.4141(6) 0.2234(5) 0.0857(4) 0.094(3) 1.000   .  Uani d ?

N(1) 0.0227(5) -0.4923(4) 0.3351(3) 0.015(2) 1.000   .  Uani d ?

N(2) 0.2850(5) -0.5346(4) 0.3069(3) 0.019(2) 1.000   .  Uani d ?

N(3) 0.2261(5) -0.4153(4) 0.4249(3) 0.021(2) 1.000   .  Uani d ?

N(4) 0.0403(5) -0.2955(4) 0.3196(3) 0.017(2) 1.000   .  Uani d ?

N(5) 0.0850(5) -0.4041(4) 0.1969(3) 0.021(2) 1.000   .  Uani d ?

C(1) 0.0510(6) -0.5724(5) 0.3685(3) 0.016(2) 1.000   .  Uani d ?

C(2) -0.0244(7) -0.6490(5) 0.3592(4) 0.024(2) 1.000   .  Uani d ?

C(3) -0.1307(7) -0.6434(5) 0.3154(4) 0.030(3) 1.000   .  Uani d ?

C(4) -0.1629(7) -0.5617(5) 0.2817(4) 0.028(2) 1.000   .  Uani d ?

C(5) -0.0852(6) -0.4862(5) 0.2935(4) 0.018(2) 1.000   .  Uani d ?

C(6) 0.1788(6) -0.5811(5) 0.4113(4) 0.019(2) 1.000   .  Uani d ?

C(7) 0.0902(8) -0.6536(6) 0.5125(4) 0.039(3) 1.000   .  Uani d ?

C(8) 0.2769(6) -0.6002(5) 0.3575(4) 0.020(2) 1.000   .  Uani d ?

C(9) 0.3525(7) -0.6777(5) 0.3611(4) 0.026(2) 1.000   .  Uani d ?

C(10) 0.4419(6) -0.6873(5) 0.3117(4) 0.026(2) 1.000   .  Uani d ?

C(11) 0.4544(7) -0.6205(5) 0.2602(4) 0.029(2) 1.000   .  Uani d ?

C(12) 0.3749(7) -0.5450(5) 0.2594(4) 0.029(2) 1.000   .  Uani d ?

C(13) 0.2321(6) -0.4981(5) 0.4548(4) 0.020(2) 1.000   .  Uani d ?

C(14) 0.3001(7) -0.5148(5) 0.5196(4) 0.032(2) 1.000   .  Uani d ?

C(15) 0.3567(8) -0.4417(6) 0.5562(4) 0.036(3) 1.000   .  Uani d ?

C(16) 0.3463(8) -0.3555(6) 0.5263(4) 0.038(3) 1.000   .  Uani d ?

C(17) 0.2818(7) -0.3444(5) 0.4604(4) 0.031(2) 1.000   .  Uani d ?

C(18) -0.1145(6) -0.3947(5) 0.2536(4) 0.020(2) 1.000   .  Uani d ?

C(19) -0.337(1) -0.4028(7) 0.2817(6) 0.089(4) 1.000   .  Uani d ?

C(20) -0.0398(7) -0.3967(5) 0.1855(4) 0.021(2) 1.000   .  Uani d ?

C(21) -0.1008(7) -0.3921(5) 0.1184(4) 0.024(2) 1.000   .  Uani d ?

C(22) -0.0276(8) -0.3938(6) 0.0592(4) 0.035(3) 1.000   .  Uani d ?

C(23) 0.1012(8) -0.3991(6) 0.0703(4) 0.035(3) 1.000   .  Uani d ?

C(24) 0.1542(7) -0.4044(5) 0.1389(4) 0.028(2) 1.000   .  Uani d ?

C(25) -0.0797(7) -0.3062(5) 0.2955(4) 0.019(2) 1.000   .  Uani d ?

C(26) -0.1654(7) -0.2362(5) 0.3029(4) 0.026(2) 1.000   .  Uani d ?

C(27) -0.1315(7) -0.1562(5) 0.3376(4) 0.028(2) 1.000   .  Uani d ?

C(28) -0.0084(7) -0.1452(5) 0.3605(4) 0.025(2) 1.000   .  Uani d ?

C(29) 0.0735(7) -0.2153(5) 0.3498(4) 0.023(2) 1.000   .  Uani d ?

H(1) -0.0017 -0.7049 0.3826 0.029 1.000   .  Uiso c ?

H(2) -0.1844 -0.6953 0.3086 0.037 1.000   .  Uiso c ?

H(3) -0.2360 -0.5577 0.2500 0.036 1.000   .  Uiso c ?

H(4) 0.1127 -0.6032 0.5423 0.046 1.000   .  Uiso c ?

H(5) 0.0079 -0.6466 0.4921 0.046 1.000   .  Uiso c ?

H(6) 0.0961 -0.7089 0.5399 0.046 1.000   .  Uiso c ?

H(7) 0.3428 -0.7223 0.3979 0.032 1.000   .  Uiso c ?

H(8) 0.4955 -0.7407 0.3137 0.035 1.000   .  Uiso c ?

H(9) 0.5157 -0.6262 0.2264 0.037 1.000   .  Uiso c ?

H(10) 0.3837 -0.5001 0.2237 0.033 1.000   .  Uiso c ?

H(11) 0.3076 -0.5748 0.5383 0.040 1.000   .  Uiso c ?

H(12) 0.4013 -0.4511 0.6011 0.047 1.000   .  Uiso c ?

H(13) 0.3847 -0.3038 0.5501 0.048 1.000   .  Uiso c ?

H(14) 0.2770 -0.2853 0.4400 0.037 1.000   .  Uiso c ?

H(15) -0.3278 -0.3545 0.3172 0.128 1.000   .  Uiso c ?

H(16) -0.4192 -0.3991 0.2596 0.128 1.000   .  Uiso c ?

H(17) -0.3274 -0.4600 0.3062 0.128 1.000   .  Uiso c ?

H(18) -0.1889 -0.3871 0.1122 0.032 1.000   .  Uiso c ?

H(19) -0.0656 -0.3910 0.0125 0.041 1.000   .  Uiso c ?

H(20) 0.1532 -0.3999 0.0307 0.043 1.000   .  Uiso c ?

H(21) 0.2425 -0.4082 0.1459 0.034 1.000   .  Uiso c ?

H(22) -0.2500 -0.2451 0.2846 0.030 1.000   .  Uiso c ?

H(23) -0.1908 -0.1100 0.3447 0.037 1.000   .  Uiso c ?

H(24) 0.0193 -0.0896 0.3835 0.031 1.000   .  Uiso c ?

H(25) 0.1592 -0.2064 0.3653 0.029 1.000   .  Uiso c ?

H(26) 0.4102 0.2813 0.0616 0.119 1.000   .  Uiso c ?

H(28) 0.4921 0.1943 0.0744 0.119 1.000   .  Uiso c ?


loop_

_atom_site_aniso_label

_atom_site_aniso_U_11

_atom_site_aniso_U_22

_atom_site_aniso_U_33

_atom_site_aniso_U_12

_atom_site_aniso_U_13

_atom_site_aniso_U_23

   Zn(1)  0.0169(4)   0.0212(5)   0.0244(5)   -0.0019(5)  0.0029(3)   0.0011(5)

   Zn(2)  0.054(2)    0.074(2)    0.045(2)    0.026(1)    -0.003(1)   0.018(1)

   Cl(1)  0.022(1)    0.032(1)    0.041(1)    -0.0057(9)  0.0094(9)   0.006(1)

   O(1)   0.034(3)    0.020(3)    0.028(3)    0.001(2)    0.000(3)    0.007(2)

   O(2)   0.012(3)    0.037(3)    0.038(3)    -0.003(3)   -0.006(2)   0.013(3)

   O(3)   0.059(5)    0.115(7)    0.112(7)    -0.018(5)   0.025(5)    -0.027(5)

   N(1)   0.014(3)    0.017(3)    0.014(3)    0.001(3)    0.003(3)    -0.004(3)

   N(2)   0.015(3)    0.020(4)    0.022(3)    0.001(3)    0.005(3)    -0.009(3)

   N(3)   0.021(3)    0.019(4)    0.024(3)    -0.004(3)   -0.002(3)   -0.002(3)

   N(4)   0.020(4)    0.016(3)    0.016(3)    -0.003(3)   0.002(3)    -0.002(3)

   N(5)   0.025(4)    0.023(3)    0.016(3)    0.003(3)    0.005(3)    0.001(3)

   C(1)   0.019(4)    0.019(4)    0.012(4)    -0.000(3)   0.005(3)    -0.000(3)

   C(2)   0.029(5)    0.017(4)    0.026(5)    -0.000(4)   0.006(4)    0.009(4)

   C(3)   0.029(5)    0.024(5)    0.037(5)    -0.007(4)   0.002(4)    0.002(4)

   C(4)   0.020(4)    0.028(5)    0.035(5)    -0.010(4)   -0.004(4)   -0.003(4)

   C(5)   0.018(4)    0.019(4)    0.017(4)    0.003(3)    0.007(3)    -0.001(3)

   C(6)   0.019(4)    0.016(4)    0.022(4)    0.001(3)    0.003(3)    0.003(3)

   C(7)   0.053(6)    0.043(6)    0.020(5)    -0.010(5)   0.005(4)    0.011(4)

   C(8)   0.020(4)    0.012(4)    0.028(4)    0.004(4)    -0.006(3)   -0.007(4)

   C(9)   0.021(4)    0.026(5)    0.031(5)    -0.007(4)   -0.003(4)   -0.004(4)

   C(10)  0.016(4)    0.033(5)    0.030(5)    0.007(4)    -0.004(4)   -0.014(4)

   C(11)  0.023(4)    0.035(5)    0.029(5)    -0.003(4)   0.006(4)    -0.017(4)

   C(12)  0.029(5)    0.029(5)    0.028(5)    -0.006(4)   -0.001(4)   -0.013(4)

   C(13)  0.016(4)    0.017(4)    0.025(4)    -0.000(3)   0.004(3)    -0.000(4)

   C(14)  0.039(5)    0.026(5)    0.029(5)    -0.004(4)   -0.001(4)   0.002(4)

   C(15)  0.049(6)    0.041(6)    0.018(5)    -0.002(5)   -0.007(4)   0.008(4)

   C(16)  0.041(6)    0.039(6)    0.031(5)    -0.010(5)   -0.005(4)   -0.012(4)

   C(17)  0.029(5)    0.027(5)    0.036(5)    -0.002(4)   -0.000(4)   -0.003(4)

   C(18)  0.019(4)    0.021(4)    0.021(4)    0.001(4)    -0.003(3)   0.007(4)

   C(19)  0.069(8)    0.044(7)    0.15(1)     -0.031(6)   -0.060(8)   0.036(8)

   C(20)  0.033(5)    0.011(4)    0.019(4)    -0.005(4)   0.001(3)    -0.001(4)

   C(21)  0.029(4)    0.017(4)    0.025(4)    0.002(4)    -0.001(4)   0.002(4)

   C(22)  0.056(6)    0.028(5)    0.020(4)    0.003(5)    -0.003(4)   -0.009(4)

   C(23)  0.049(5)    0.028(5)    0.028(5)    0.010(5)    0.017(4)    0.003(4)

   C(24)  0.030(4)    0.025(4)    0.029(5)    0.005(4)    0.005(4)    -0.003(4)

   C(25)  0.021(4)    0.017(4)    0.021(4)    -0.002(4)   0.008(3)    0.004(4)

   C(26)  0.025(5)    0.025(5)    0.028(5)    0.000(4)    -0.000(4)   0.005(4)

   C(27)  0.029(5)    0.020(5)    0.037(5)    0.014(4)    0.005(4)    0.002(4)

   C(28)  0.042(5)    0.013(4)    0.021(4)    0.004(4)    0.002(4)    -0.004(3)

   C(29)  0.024(4)    0.028(5)    0.017(4)    -0.002(4)   0.002(3)    -0.001(4)


#==============================================================================


# REFINEMENT DATA


_refine_special_details

;

   ?

;

_refine_ls_structure_factor_coef       Fsqd

_refine_ls_matrix_type                 full

_refine_ls_weighting_scheme            sigma

_refine_ls_weighting_details           'w = 1/[\s^2^(Fo) + 0.00022|Fo|^2^]'

_refine_ls_hydrogen_treatment          noref

_refine_ls_extinction_method           none

_refine_ls_extinction_coef             ?

_refine_ls_abs_structure_details       ?

_refine_ls_abs_structure_Flack         ?

_refine_ls_number_reflns               5108

_refine_ls_number_parameters           377

_refine_ls_number_restraints           0

_refine_ls_number_constraints          0

_refine_ls_R_factor_all                0.1642

_refine_ls_R_factor_gt                 ?

_refine_ls_wR_factor_all               0.1910

_refine_ls_wR_factor_ref               ?

_refine_ls_goodness_of_fit_all         1.678

_refine_ls_goodness_of_fit_ref         1.680

_refine_ls_shift/su_max                0.5300

_refine_ls_shift/su_mean               0.0138

_refine_diff_density_min               -1.81

_refine_diff_density_max               2.48


#==============================================================================


# MOLECULAR GEOMETRY


_geom_special_details

;

   ?

;

loop_

_geom_bond_atom_site_label_1

_geom_bond_atom_site_label_2

_geom_bond_distance

_geom_bond_site_symmetry_1

_geom_bond_site_symmetry_2

_geom_bond_publ_flag

         ?  ?    ?      ? ?  ?

# -- ENTER BONDS HERE, ONE PER LINE --

# e.g. C1 C2 1.541(1) . . yes

#------------------------------------------------------------------------------

loop_

_geom_angle_atom_site_label_1

_geom_angle_atom_site_label_2

_geom_angle_atom_site_label_3

_geom_angle

_geom_angle_site_symmetry_1

_geom_angle_site_symmetry_2

_geom_angle_site_symmetry_3

_geom_angle_publ_flag

# -- ENTER ANGLES HERE, ONE PER LINE --

# e.g. C1 C2 C3 109.4(3) . . . yes

         ?  ?  ?     ?     ? ? ?  ?

#------------------------------------------------------------------------------

loop_

_geom_contact_atom_site_label_1

_geom_contact_atom_site_label_2

_geom_contact_distance

_geom_contact_site_symmetry_1

_geom_contact_site_symmetry_2

_geom_contact_publ_flag

#------------------------------------------------------------------------------

loop_

_geom_torsion_atom_site_label_1

_geom_torsion_atom_site_label_2

_geom_torsion_atom_site_label_3

_geom_torsion_atom_site_label_4

_geom_torsion_site_symmetry_1

_geom_torsion_site_symmetry_2

_geom_torsion_site_symmetry_3

_geom_torsion_site_symmetry_4

_geom_torsion

_geom_torsion_publ_flag

         ?  ?  ?  ?   ?   ? ? ? ?  ?

# -- ENTER TORSION ANGLES HERE, ONE PER LINE --

# e.g. C1 C2 C3 C4 52.8(1) . . . . yes

#------------------------------------------------------------------------------

loop_

_geom_bond_atom_site_label_D

_geom_bond_atom_site_label_H

_geom_contact_atom_site_label_A

_geom_bond_distance_DH

_geom_contact_distance_HA

_geom_contact_distance_DA

_geom_angle_DHA

_geom_contact_site_symmetry_A


#==============================================================================

# Additional structures and associated data_? identifiers

# should be added at this point if there is more than one

# structure analysis in the CIF.

#===END
